# Supplementary material for: DFT study of the Ring Opening Polymerization of ε-caprolactone by grafted lanthanide complexes: 1—Effect of the grafting mode on the reactivity of borohydride complexes
Source: Royal Society of Chemistry journal article supplement (doi:10.1039/c1dt10566c), 2011-01-01
Supplement: c1dt10566c.pdf [file c1dt10566c.pdf]

# DFT study of the Ring Opening Polymerization of $\epsilon$ -caprolactone by grafted lanthanide complexes : 1- Effect of the grafting mode on the reactivity of borohydride complexes

Iker Del Rosal, Romuald Poteau and Laurent Maron\*

1. Université de Toulouse ; INSA, UPS ; LPCNO (IRSAMC) ; 135 avenue de Rangueil, F-31077 Toulouse, France

2. CNRS ; UMR 5215 (IRSAMC) ; F-31077 Toulouse, France

e-mail: [laurent.maron@irsamc.ups-tlse.fr](mailto:laurent.maron@irsamc.ups-tlse.fr)

## 4 - Study of the initiation step of ROP of $\epsilon$ -Caprolactone

### 4.1 $(\text{BH}_4)\text{La@c-1}$ as catalyst form

Study of the hydride transfer and  $\text{BH}_3$  trapping steps of the  $\epsilon$ -CL ROP reaction with  $(\text{BH}_4)\text{La@c-1}$

$(\text{BH}_4)\text{La@c-1}$  :

59

|    |           |           |           |
|----|-----------|-----------|-----------|
| O  | 0.723489  | 0.573913  | 3.530641  |
| Si | 1.154245  | 1.701256  | 4.716543  |
| Si | -0.294809 | 0.537507  | 2.253826  |
| O  | -0.090582 | -0.909368 | 1.488470  |
| Si | 0.071736  | -1.879268 | 0.156005  |
| O  | 0.385321  | -3.411704 | 0.640046  |
| Si | -0.511308 | -4.840910 | 0.695962  |
| O  | -1.872946 | 0.617240  | 2.831357  |
| Si | -3.201192 | 0.474325  | 1.871466  |
| N  | -4.263153 | -0.628899 | 2.608068  |
| O  | -0.152225 | 1.835402  | 1.250203  |
| Si | 0.995915  | 2.475645  | 0.240982  |
| O  | 1.944670  | 3.440651  | 1.189473  |
| O  | -4.082022 | 1.888366  | 1.525414  |
| La | -4.065497 | 1.862761  | -1.170849 |
| O  | -2.397436 | 3.242801  | -1.692533 |
| Si | -0.860189 | 3.507071  | -2.156451 |
| O  | 0.260468  | 3.378367  | -0.915716 |
| O  | -2.703335 | 0.252951  | 0.299965  |
| Si | -2.114669 | -0.496507 | -1.126631 |
| O  | -1.401197 | -1.920538 | -0.669850 |
| Si | -5.009058 | 2.824882  | 2.642862  |
| O  | -3.379964 | -0.241668 | -2.080344 |
| O  | -0.840356 | 0.488472  | -1.568212 |
| Si | -0.172004 | 0.801206  | -3.074214 |
| O  | -0.821905 | -0.103572 | -4.273245 |
| Si | -2.108333 | 0.096319  | -5.356166 |
| B  | -6.701098 | 2.392594  | -1.295011 |
| O  | -0.383643 | 2.411989  | -3.347946 |
| O  | 1.417546  | 0.369240  | -2.882821 |
| Si | 2.063030  | -0.011092 | -1.395464 |
| O  | 1.320285  | -1.376065 | -0.792436 |
| O  | -0.672255 | 5.012700  | -2.802532 |
| Si | 0.520320  | 6.190508  | -2.666292 |
| O  | 1.961199  | 1.273511  | -0.366469 |
| O  | 3.673338  | -0.313852 | -1.552064 |
| H  | 0.797201  | 1.115058  | 6.040934  |
| H  | 2.796360  | 3.665152  | 0.802742  |
| H  | 0.248963  | 7.199709  | -3.729717 |
| H  | -0.806267 | -5.321061 | -0.684374 |

|   |           |           |           |
|---|-----------|-----------|-----------|
| H | -6.388734 | 2.273760  | 2.699083  |
| H | 3.885670  | -1.129443 | -2.015363 |
| H | -1.533330 | 0.388160  | -6.701290 |
| H | 1.881122  | 5.606312  | -2.864896 |
| H | 0.456252  | 6.846415  | -1.326039 |
| H | 2.624694  | 1.918876  | 4.635700  |
| H | -4.340663 | 2.748066  | 3.970062  |
| H | -4.997233 | 4.210525  | 2.105890  |
| H | 0.420311  | 2.982675  | 4.512593  |
| H | -2.872846 | -1.178934 | -5.389662 |
| H | -2.987265 | 1.227805  | -4.939615 |
| H | 0.330363  | -5.833950 | 1.419513  |
| H | -1.789167 | -4.622218 | 1.437794  |
| H | -5.161390 | -0.852904 | 2.206667  |
| H | -3.886448 | -1.372559 | 3.176811  |
| H | -6.141395 | 2.393971  | -2.410900 |
| H | -7.858862 | 2.685610  | -1.392606 |
| H | -6.540934 | 1.267725  | -0.800390 |
| H | -6.089892 | 3.215097  | -0.585602 |

A:

77

|    |           |           |           |
|----|-----------|-----------|-----------|
| O  | 0.265511  | 0.712258  | 3.676062  |
| Si | 0.916995  | 1.846978  | 4.660629  |
| O  | 0.172454  | 3.311054  | 4.536098  |
| Si | -1.261478 | 4.000811  | 4.982701  |
| O  | -1.926081 | 3.129979  | 6.229310  |
| Si | -1.922841 | 2.865303  | 7.860533  |
| O  | -3.353086 | 2.193241  | 8.329019  |
| Si | -0.100912 | 0.603052  | 2.031086  |
| O  | 0.893070  | 1.224821  | 6.188427  |
| Si | 0.798122  | 1.317252  | 7.836509  |
| O  | -0.711253 | 1.807285  | 8.300238  |
| O  | 2.500832  | 2.110372  | 4.190418  |
| Si | 3.542462  | 3.147119  | 4.943938  |
| O  | 2.764713  | 3.785932  | 6.273277  |
| Si | 2.188858  | 3.860762  | 7.872087  |
| O  | 0.593886  | 4.331321  | 7.713922  |
| Si | -0.461029 | 5.267083  | 8.593352  |
| O  | -1.825342 | 4.316131  | 8.670003  |
| O  | 1.027353  | -0.177580 | 8.474524  |
| Si | 2.352182  | -0.961083 | 9.163566  |
| O  | 2.036470  | 2.294044  | 8.421303  |
| N  | 5.031604  | 2.345896  | 5.115264  |
| O  | 3.830694  | 4.633896  | 4.198354  |
| Si | 4.757667  | 4.940566  | 2.787082  |
| O  | -2.250773 | 3.853391  | 3.666108  |
| O  | -1.068632 | 5.591044  | 5.343896  |
| Si | -0.212722 | 6.805011  | 6.130148  |
| O  | -0.894918 | 8.231842  | 5.626982  |
| Si | -2.215300 | 8.566631  | 4.647106  |
| La | 3.547398  | 6.276566  | 6.460710  |
| O  | 1.385471  | 6.784262  | 5.922319  |
| O  | 3.114660  | 5.025011  | 8.465832  |
| O  | -0.649086 | 6.676227  | 7.766936  |
| O  | 0.029821  | 5.602474  | 10.130090 |
| Si | -0.508564 | 5.024569  | 11.626719 |
| H  | 0.714358  | -0.506270 | 1.455700  |
| H  | -3.122935 | 4.243032  | 3.777293  |
| H  | -2.395568 | 10.048421 | 4.666488  |
| H  | 2.645882  | -0.394506 | 10.511633 |
| H  | 6.202292  | 4.717172  | 3.053975  |
| H  | -3.342130 | 1.231733  | 8.342413  |

|   |           |           |           |
|---|-----------|-----------|-----------|
| H | -1.905557 | 5.477511  | 11.884387 |
| H | -3.458174 | 7.914342  | 5.161572  |
| H | -1.971527 | 8.117137  | 3.243518  |
| H | -1.550232 | 0.283771  | 1.900571  |
| H | 4.273268  | 4.038258  | 1.704148  |
| H | 4.487813  | 6.364134  | 2.446175  |
| H | 0.214575  | 1.880114  | 1.328527  |
| H | -0.428453 | 3.537331  | 11.681934 |
| H | 0.409467  | 5.619365  | 12.641377 |
| H | 1.974040  | -2.397305 | 9.284963  |
| H | 3.555471  | -0.827331 | 8.288891  |
| H | 5.818213  | 2.835441  | 5.519551  |
| H | 5.050562  | 1.350254  | 5.276432  |
| O | 3.797843  | 8.946362  | 6.552057  |
| C | 3.500352  | 9.189857  | 7.714622  |
| O | 3.247672  | 8.111339  | 8.472512  |
| C | 2.831175  | 8.145312  | 9.869748  |
| C | 1.491469  | 8.826009  | 10.076361 |
| C | 1.522247  | 10.354564 | 10.038635 |
| C | 1.969770  | 10.958074 | 8.707442  |
| C | 3.400923  | 10.569742 | 8.287164  |
| H | 4.079364  | 10.647654 | 9.147407  |
| H | 3.772000  | 11.238847 | 7.508723  |
| H | 1.940677  | 12.050209 | 8.782968  |
| H | 1.269494  | 10.685917 | 7.908414  |
| H | 0.521234  | 10.732526 | 10.274564 |
| H | 2.184122  | 10.722136 | 10.836122 |
| H | 1.132036  | 8.500761  | 11.059741 |
| H | 0.777662  | 8.422556  | 9.349023  |
| H | 2.778992  | 7.083775  | 10.113202 |
| H | 3.637188  | 8.609897  | 10.449139 |
| H | 5.931471  | 6.834720  | 7.227472  |
| B | 6.268532  | 6.202081  | 6.215853  |
| H | 7.460184  | 6.185596  | 6.063523  |
| H | 5.796837  | 5.058799  | 6.340546  |
| H | 5.703037  | 6.728529  | 5.238242  |

TS<sub>A→AB</sub>

77

|    |           |           |          |
|----|-----------|-----------|----------|
| O  | 0.951268  | 0.642039  | 3.449871 |
| Si | 1.160155  | 1.823867  | 4.560770 |
| O  | 0.146312  | 3.106133  | 4.358308 |
| Si | -1.478787 | 3.405895  | 4.464334 |
| O  | -2.182987 | 2.364196  | 5.544415 |
| Si | -2.373680 | 1.963641  | 7.132780 |
| O  | -3.652839 | 0.926177  | 7.170839 |
| Si | 0.860440  | 0.556466  | 1.764603 |
| O  | 1.049752  | 1.124794  | 6.050309 |
| Si | 0.591247  | 1.085329  | 7.640773 |
| O  | -1.048860 | 1.182329  | 7.776115 |
| O  | 2.699888  | 2.464547  | 4.374338 |
| Si | 3.330215  | 3.646564  | 5.334627 |
| O  | 2.240409  | 3.994539  | 6.543711 |
| Si | 1.293238  | 3.871710  | 7.960380 |
| O  | -0.281521 | 3.986123  | 7.411187 |
| Si | -1.654958 | 4.578642  | 8.162348 |
| O  | -2.725617 | 3.317542  | 8.036606 |
| O  | 1.058793  | -0.341732 | 8.299988 |
| Si | 2.336139  | -0.801357 | 9.300827 |
| O  | 1.404569  | 2.298218  | 8.483733 |
| N  | 4.926368  | 3.215125  | 5.717671 |
| O  | 3.347408  | 5.224426  | 4.704766 |
| Si | 4.164038  | 5.826008  | 3.315304 |

|    |           |           |           |
|----|-----------|-----------|-----------|
| O  | -2.101074 | 3.060937  | 2.971542  |
| O  | -1.724544 | 4.990724  | 4.814166  |
| Si | -1.448378 | 6.311667  | 5.812232  |
| O  | -2.376138 | 7.540146  | 5.210918  |
| Si | -3.631485 | 7.583461  | 4.095310  |
| La | 2.182778  | 6.581814  | 6.769024  |
| O  | 0.109546  | 6.750837  | 5.941655  |
| O  | 1.740082  | 5.218673  | 8.707706  |
| O  | -2.110968 | 5.915868  | 7.314630  |
| O  | -1.448287 | 4.919520  | 9.752336  |
| Si | -1.027207 | 6.297302  | 10.633081 |
| H  | 1.973272  | -0.321102 | 1.298170  |
| H  | -3.054224 | 2.931946  | 2.960981  |
| H  | -4.237281 | 8.943814  | 4.184674  |
| H  | 2.122281  | -0.285457 | 10.683748 |
| H  | 5.623436  | 5.570744  | 3.433853  |
| H  | -3.736831 | 0.431194  | 7.991095  |
| H  | -2.251290 | 6.791664  | 11.329509 |
| H  | -4.670315 | 6.554843  | 4.404747  |
| H  | -3.114905 | 7.359987  | 2.711690  |
| H  | -0.449645 | -0.050203 | 1.399575  |
| H  | 3.602616  | 5.150274  | 2.113188  |
| H  | 3.863326  | 7.282727  | 3.299913  |
| H  | 0.996376  | 1.911661  | 1.157465  |
| H  | -0.003550 | 5.902512  | 11.639832 |
| H  | -0.498128 | 7.372977  | 9.745796  |
| H  | 2.350361  | -2.291158 | 9.307058  |
| H  | 3.631863  | -0.284785 | 8.766742  |
| H  | 5.509546  | 3.843486  | 6.251921  |
| H  | 5.161789  | 2.242425  | 5.844751  |
| O  | 3.306272  | 8.751511  | 6.604151  |
| C  | 3.949572  | 8.775027  | 7.709786  |
| O  | 3.193897  | 8.103137  | 8.695531  |
| C  | 3.728186  | 7.928418  | 10.022449 |
| C  | 3.314856  | 9.084526  | 10.917916 |
| C  | 3.981073  | 10.425455 | 10.599860 |
| C  | 3.858284  | 10.898274 | 9.146221  |
| C  | 4.664708  | 10.051034 | 8.150384  |
| H  | 5.641935  | 9.811991  | 8.582948  |
| H  | 4.849075  | 10.599426 | 7.222867  |
| H  | 4.238769  | 11.924370 | 9.085330  |
| H  | 2.806331  | 10.944312 | 8.838945  |
| H  | 3.551837  | 11.188752 | 11.259765 |
| H  | 5.048423  | 10.368507 | 10.857135 |
| H  | 3.541141  | 8.803873  | 11.954519 |
| H  | 2.223852  | 9.182021  | 10.854689 |
| H  | 3.304386  | 6.984260  | 10.371444 |
| H  | 4.816822  | 7.811166  | 9.953209  |
| H  | 5.044273  | 7.956943  | 7.623555  |
| B  | 5.548157  | 6.788901  | 7.218539  |
| H  | 6.540719  | 6.654649  | 7.886781  |
| H  | 4.662802  | 6.000420  | 7.527195  |
| H  | 5.676023  | 6.996842  | 6.036979  |

**AB :**

77

|    |           |          |          |
|----|-----------|----------|----------|
| O  | 0.855818  | 0.755147 | 3.328880 |
| Si | 1.109212  | 1.874979 | 4.493565 |
| O  | 0.116906  | 3.184865 | 4.374524 |
| Si | -1.505073 | 3.491053 | 4.515842 |
| O  | -2.200455 | 2.401830 | 5.554487 |
| Si | -2.374266 | 1.941510 | 7.128415 |
| O  | -3.669092 | 0.923273 | 7.146230 |

|    |           |           |           |
|----|-----------|-----------|-----------|
| Si | 0.739252  | 0.763781  | 1.642715  |
| O  | 1.014034  | 1.106127  | 5.949507  |
| Si | 0.583500  | 0.998830  | 7.544811  |
| O  | -1.051555 | 1.114822  | 7.717406  |
| O  | 2.660038  | 2.491168  | 4.309269  |
| Si | 3.333103  | 3.601158  | 5.323786  |
| O  | 2.252957  | 3.927789  | 6.547220  |
| Si | 1.336744  | 3.757256  | 7.985135  |
| O  | -0.242966 | 3.928033  | 7.460322  |
| Si | -1.597144 | 4.500538  | 8.260704  |
| O  | -2.689182 | 3.263130  | 8.091149  |
| O  | 1.040678  | -0.464451 | 8.127414  |
| Si | 2.354036  | -0.995297 | 9.042964  |
| O  | 1.430080  | 2.158761  | 8.428384  |
| N  | 4.917628  | 3.099676  | 5.677939  |
| O  | 3.410569  | 5.204577  | 4.769818  |
| Si | 4.372545  | 5.804829  | 3.472809  |
| O  | -2.146949 | 3.220505  | 3.015976  |
| O  | -1.739742 | 5.057259  | 4.946130  |
| Si | -1.432996 | 6.340804  | 5.984327  |
| O  | -2.380476 | 7.590055  | 5.461077  |
| Si | -3.714354 | 7.664358  | 4.442590  |
| La | 2.211105  | 6.490752  | 6.856322  |
| O  | 0.126848  | 6.776457  | 6.079664  |
| O  | 1.820666  | 5.062016  | 8.777333  |
| O  | -2.048659 | 5.885074  | 7.490287  |
| O  | -1.359688 | 4.758378  | 9.862143  |
| Si | -0.886812 | 6.077346  | 10.804006 |
| H  | 1.842858  | -0.087567 | 1.110220  |
| H  | -3.103103 | 3.115977  | 3.007432  |
| H  | -4.302256 | 9.025948  | 4.604090  |
| H  | 2.211907  | -0.549326 | 10.458839 |
| H  | 5.752110  | 6.063929  | 3.961852  |
| H  | -3.748336 | 0.397198  | 7.947390  |
| H  | -2.082897 | 6.558608  | 11.556091 |
| H  | -4.735144 | 6.635359  | 4.806405  |
| H  | -3.302632 | 7.466875  | 3.020424  |
| H  | -0.577496 | 0.179662  | 1.265417  |
| H  | 4.370521  | 4.791395  | 2.382329  |
| H  | 3.707952  | 7.063196  | 3.041387  |
| H  | 0.868840  | 2.151079  | 1.111815  |
| H  | 0.153875  | 5.611378  | 11.761163 |
| H  | -0.359178 | 7.188819  | 9.960300  |
| H  | 2.343853  | -2.483354 | 8.970691  |
| H  | 3.632611  | -0.469808 | 8.476735  |
| H  | 5.511966  | 3.669550  | 6.263153  |
| H  | 5.123381  | 2.113809  | 5.741017  |
| O  | 3.659316  | 8.384843  | 6.493862  |
| C  | 4.190738  | 8.567502  | 7.663728  |
| O  | 3.262270  | 8.077482  | 8.641213  |
| C  | 3.557391  | 8.194965  | 10.044329 |
| C  | 2.973434  | 9.483026  | 10.602550 |
| C  | 3.665012  | 10.765691 | 10.133086 |
| C  | 3.813006  | 10.925232 | 8.614719  |
| C  | 4.801249  | 9.934077  | 7.983870  |
| H  | 5.671355  | 9.816888  | 8.640139  |
| H  | 5.172400  | 10.304076 | 7.024084  |
| H  | 4.182148  | 11.937179 | 8.412141  |
| H  | 2.837876  | 10.851852 | 8.117727  |
| H  | 3.106898  | 11.622599 | 10.528914 |
| H  | 4.665280  | 10.821394 | 10.585985 |
| H  | 3.016841  | 9.427695  | 11.697946 |
| H  | 1.909169  | 9.510173  | 10.336152 |

|   |          |          |           |
|---|----------|----------|-----------|
| H | 3.101500 | 7.317450 | 10.509110 |
| H | 4.642033 | 8.125333 | 10.188634 |
| H | 5.185017 | 7.819879 | 7.826984  |
| B | 5.780823 | 6.557870 | 7.787906  |
| H | 6.159618 | 6.445555 | 8.922267  |
| H | 4.813474 | 5.880464 | 7.486895  |
| H | 6.573812 | 6.765340 | 6.910295  |

TS<sub>AB→B</sub>

|    |           |           |           |
|----|-----------|-----------|-----------|
| 77 |           |           |           |
| C  | 3.103754  | 8.903504  | 9.824304  |
| C  | 1.988975  | 9.897122  | 9.528935  |
| C  | 2.368811  | 11.034355 | 8.577006  |
| C  | 3.028966  | 10.604855 | 7.260466  |
| C  | 4.428896  | 10.007541 | 7.444828  |
| C  | 4.474360  | 8.505365  | 7.743452  |
| O  | 3.395505  | 8.097774  | 8.679940  |
| La | 2.554400  | 6.252028  | 7.120643  |
| O  | 4.288321  | 7.715753  | 6.664136  |
| Si | 3.416759  | 3.488759  | 5.157684  |
| O  | 3.610629  | 5.139621  | 4.838670  |
| Si | 4.570286  | 5.877877  | 3.615381  |
| O  | 2.560902  | 2.604493  | 4.061107  |
| Si | 0.988578  | 2.073138  | 4.310985  |
| O  | 0.954367  | 1.134271  | 5.666513  |
| Si | 0.629854  | 0.830364  | 7.259991  |
| O  | 1.625119  | 1.787710  | 8.225644  |
| Si | 1.662207  | 3.432462  | 7.988857  |
| O  | 2.316902  | 4.572630  | 8.898346  |
| O  | 0.557182  | 1.126278  | 3.048466  |
| Si | 0.328169  | 1.353929  | 1.389610  |
| O  | 0.087519  | 3.447985  | 4.437590  |
| Si | -1.497825 | 3.819054  | 4.745082  |
| O  | -1.615742 | 5.318063  | 5.400929  |
| Si | -1.111701 | 6.462691  | 6.522775  |
| O  | -1.567896 | 5.869676  | 8.039497  |
| Si | -1.169626 | 4.364445  | 8.576112  |
| O  | -0.786995 | 4.381910  | 10.170548 |
| Si | -0.047499 | 5.489751  | 11.208511 |
| O  | -2.182752 | 2.639483  | 5.688884  |
| Si | -2.264938 | 2.027534  | 7.217538  |
| O  | -2.374257 | 3.248300  | 8.343706  |
| O  | -2.256962 | 3.785419  | 3.276462  |
| O  | -3.640953 | 1.122349  | 7.250518  |
| O  | -0.972540 | 1.041544  | 7.584051  |
| O  | 1.011386  | -0.729936 | 7.591312  |
| Si | 2.168606  | -1.473009 | 8.566909  |
| O  | 2.481246  | 3.709287  | 6.511800  |
| N  | 4.962588  | 2.786363  | 5.283622  |
| O  | 0.076132  | 3.818486  | 7.599830  |
| O  | -2.052347 | 7.798343  | 6.259095  |
| Si | -3.427785 | 8.050954  | 5.329633  |
| O  | 0.466920  | 6.811882  | 6.470510  |
| B  | 6.813049  | 6.309238  | 8.345704  |
| H  | 1.325913  | 0.504915  | 0.675103  |
| H  | -3.217591 | 3.784791  | 3.325235  |
| H  | -3.952947 | 9.398075  | 5.698476  |
| H  | 1.938994  | -1.136797 | 10.001868 |
| H  | 5.970840  | 6.007585  | 4.098426  |
| H  | -3.733332 | 0.568116  | 8.030977  |
| H  | -1.085518 | 5.973149  | 12.166922 |
| H  | -4.470615 | 7.017617  | 5.608273  |
| H  | -3.095449 | 8.032114  | 3.873152  |

|   |           |           |           |
|---|-----------|-----------|-----------|
| H | -1.051177 | 0.910173  | 1.046384  |
| H | 4.512752  | 5.015819  | 2.401454  |
| H | 3.955626  | 7.205035  | 3.356438  |
| H | 0.525521  | 2.785085  | 1.021270  |
| H | 1.036912  | 4.791795  | 11.949362 |
| H | 0.495159  | 6.659193  | 10.456541 |
| H | 2.014187  | -2.939713 | 8.354494  |
| H | 3.542605  | -1.047236 | 8.164729  |
| H | 5.665441  | 3.173184  | 5.895543  |
| H | 5.057124  | 1.789681  | 5.156101  |
| H | 4.960523  | 10.561269 | 8.230382  |
| H | 5.022886  | 10.124116 | 6.532251  |
| H | 3.110733  | 11.488844 | 6.617652  |
| H | 2.384757  | 9.900935  | 6.717536  |
| H | 1.464385  | 11.613317 | 8.355129  |
| H | 3.050984  | 11.723584 | 9.095421  |
| H | 1.644129  | 10.320104 | 10.481661 |
| H | 1.139860  | 9.333912  | 9.119553  |
| H | 2.801319  | 8.210935  | 10.616299 |
| H | 4.022991  | 9.402426  | 10.157993 |
| H | 5.421300  | 8.276094  | 8.284497  |
| H | 7.404153  | 7.055893  | 9.067178  |
| H | 5.842669  | 5.738547  | 8.751853  |
| H | 7.224899  | 6.090289  | 7.246462  |

**B:**

77

|    |           |           |           |
|----|-----------|-----------|-----------|
| C  | 2.617043  | 9.064317  | 9.761227  |
| C  | 1.607228  | 9.896838  | 8.985547  |
| C  | 2.212683  | 10.977242 | 8.086499  |
| C  | 3.305710  | 10.495191 | 7.125517  |
| C  | 4.581891  | 10.029380 | 7.836022  |
| C  | 4.590675  | 8.580668  | 8.308108  |
| O  | 3.327502  | 8.159828  | 8.896620  |
| La | 2.845283  | 6.115707  | 7.391783  |
| O  | 4.747134  | 7.695850  | 7.247711  |
| Si | 3.506777  | 3.442936  | 5.294489  |
| O  | 3.584637  | 5.098965  | 4.943880  |
| Si | 4.323264  | 5.892801  | 3.610092  |
| O  | 2.670861  | 2.492800  | 4.238124  |
| Si | 1.075129  | 2.016492  | 4.427789  |
| O  | 0.952263  | 1.075157  | 5.775121  |
| Si | 0.589625  | 0.783008  | 7.362619  |
| O  | 1.611963  | 1.704888  | 8.336728  |
| Si | 1.690217  | 3.346865  | 8.098084  |
| O  | 2.307727  | 4.478002  | 9.056195  |
| O  | 0.651054  | 1.092129  | 3.146355  |
| Si | 0.453911  | 1.342940  | 1.486902  |
| O  | 0.225555  | 3.425505  | 4.530652  |
| Si | -1.341208 | 3.874668  | 4.821861  |
| O  | -1.375384 | 5.372998  | 5.493854  |
| Si | -0.819341 | 6.457262  | 6.646757  |
| O  | -1.386104 | 5.889665  | 8.136650  |
| Si | -1.095548 | 4.351264  | 8.650734  |
| O  | -0.736356 | 4.304285  | 10.248913 |
| Si | 0.069871  | 5.290398  | 11.355887 |
| O  | -2.109160 | 2.718593  | 5.730527  |
| Si | -2.253643 | 2.089278  | 7.249190  |
| O  | -2.357820 | 3.311760  | 8.375535  |
| O  | -2.088570 | 3.909096  | 3.346853  |
| O  | -3.658200 | 1.228529  | 7.234418  |
| O  | -1.011555 | 1.053051  | 7.651988  |
| O  | 0.893846  | -0.789516 | 7.710730  |

|    |           |           |           |
|----|-----------|-----------|-----------|
| Si | 2.148022  | -1.599818 | 8.495871  |
| O  | 2.610421  | 3.625154  | 6.689149  |
| N  | 5.095311  | 2.854142  | 5.392371  |
| O  | 0.121866  | 3.747133  | 7.669651  |
| O  | -1.621734 | 7.878224  | 6.366094  |
| Si | -3.059266 | 8.229346  | 5.569257  |
| O  | 0.784964  | 6.688999  | 6.669568  |
| B  | 5.852291  | 6.613417  | 7.269207  |
| H  | 1.420860  | 0.455118  | 0.777930  |
| H  | -3.047719 | 3.850644  | 3.390038  |
| H  | -3.457272 | 9.604809  | 5.990392  |
| H  | 2.117549  | -1.308060 | 9.958070  |
| H  | 5.746995  | 5.483844  | 3.494111  |
| H  | -3.742104 | 0.597401  | 7.955230  |
| H  | -0.932963 | 5.718689  | 12.376347 |
| H  | -4.137755 | 7.263474  | 5.936984  |
| H  | -2.857804 | 8.205971  | 4.089412  |
| H  | -0.940125 | 0.966315  | 1.122385  |
| H  | 3.568482  | 5.533067  | 2.377168  |
| H  | 4.191098  | 7.343816  | 3.907361  |
| H  | 0.719509  | 2.766914  | 1.133624  |
| H  | 1.148516  | 4.503439  | 12.009238 |
| H  | 0.626147  | 6.507420  | 10.695412 |
| H  | 1.920029  | -3.053015 | 8.259053  |
| H  | 3.469539  | -1.196150 | 7.929003  |
| H  | 5.787403  | 3.364717  | 5.922570  |
| H  | 5.268955  | 1.861334  | 5.352736  |
| H  | 4.789875  | 10.688729 | 8.688546  |
| H  | 5.449563  | 10.110708 | 7.172789  |
| H  | 3.566220  | 11.324515 | 6.458508  |
| H  | 2.921379  | 9.699790  | 6.473691  |
| H  | 1.403153  | 11.438729 | 7.509384  |
| H  | 2.633391  | 11.775781 | 8.714484  |
| H  | 0.928681  | 10.365114 | 9.710121  |
| H  | 0.991782  | 9.211255  | 8.389348  |
| H  | 2.111641  | 8.428378  | 10.493355 |
| H  | 3.340766  | 9.683964  | 10.304096 |
| H  | 5.381404  | 8.414798  | 9.052182  |
| H  | 6.588144  | 6.780909  | 8.216804  |
| H  | 5.264010  | 5.506986  | 7.424070  |
| H  | 6.407377  | 6.601016  | 6.192430  |

Study of the ring opening step of the  $\epsilon$ -CL ROP reaction with  $(\text{BH}_4)\text{La@c-1}$

$\text{TS}_{\text{B}\rightarrow\text{c}}$

77

|    |           |           |          |
|----|-----------|-----------|----------|
| C  | 2.367942  | 9.207990  | 9.753488 |
| O  | 2.696523  | 8.432992  | 8.632480 |
| La | 2.165593  | 6.547080  | 7.422336 |
| O  | 3.328005  | 5.557772  | 5.094957 |
| Si | 3.803599  | 6.395074  | 3.677490 |
| C  | 2.096350  | 10.656772 | 9.375418 |
| C  | 3.307042  | 11.405579 | 8.815500 |
| C  | 3.938993  | 10.828054 | 7.537079 |
| C  | 5.106673  | 9.840711  | 7.728508 |
| C  | 4.800261  | 8.417890  | 8.125527 |
| O  | 4.549568  | 7.511994  | 7.176271 |
| B  | 6.049445  | 7.089275  | 7.227094 |
| O  | 2.517312  | 3.967832  | 6.831392 |
| Si | 1.489294  | 3.625400  | 8.143525 |
| O  | -0.069827 | 3.793930  | 7.547272 |
| Si | -1.457896 | 4.208556  | 8.395715 |
| O  | -1.968316 | 5.651311  | 7.782321 |



|    |           |           |           |
|----|-----------|-----------|-----------|
| Si | -1.386013 | 6.276342  | 6.318335  |
| O  | -2.411319 | 7.509054  | 5.910787  |
| Si | -4.026737 | 7.816419  | 6.254933  |
| Si | 3.505916  | 3.919096  | 5.494390  |
| N  | 5.163384  | 3.614893  | 5.699186  |
| O  | 1.830525  | 4.873904  | 9.095560  |
| O  | 0.143749  | 6.788999  | 6.449061  |
| O  | 2.920240  | 2.822280  | 4.412293  |
| Si | 1.412126  | 2.095587  | 4.501247  |
| O  | 1.254708  | 1.065177  | 3.240365  |
| Si | 1.178744  | 1.216735  | 1.558932  |
| O  | 1.334337  | 1.202502  | 5.884010  |
| Si | 0.857956  | 0.898792  | 7.439116  |
| O  | 1.370814  | -0.593222 | 7.885539  |
| Si | 2.707090  | -1.158936 | 8.745631  |
| O  | 0.349091  | 3.352768  | 4.461267  |
| Si | -1.286531 | 3.577667  | 4.591076  |
| O  | -1.942877 | 2.348290  | 5.491622  |
| Si | -2.126791 | 1.741282  | 7.012551  |
| O  | -2.501849 | 2.960022  | 8.083968  |
| O  | -0.785242 | 0.915418  | 7.559015  |
| O  | 1.611048  | 2.001526  | 8.468434  |
| O  | -3.381203 | 0.677921  | 6.920838  |
| O  | -1.624317 | 5.070397  | 5.179279  |
| O  | -1.866150 | 3.445669  | 3.048320  |
| O  | -1.230038 | 4.297025  | 10.016142 |
| Si | -0.714709 | 5.494819  | 11.091242 |
| H  | 2.345409  | 0.483798  | 0.985941  |
| H  | -2.815702 | 3.574355  | 2.965964  |
| H  | -4.182217 | 8.296086  | 7.660842  |
| H  | 2.545627  | -0.869406 | 10.199658 |
| H  | 5.284649  | 6.365279  | 3.543127  |
| H  | -3.424519 | 0.055067  | 7.652333  |
| H  | -1.881568 | 5.843616  | 11.955772 |
| H  | -4.868054 | 6.598470  | 6.052037  |
| H  | -4.469619 | 8.888414  | 5.315753  |
| H  | -0.090110 | 0.592820  | 1.092260  |
| H  | 3.150243  | 5.766364  | 2.497703  |
| H  | 3.315088  | 7.788447  | 3.873377  |
| H  | 1.235896  | 2.651451  | 1.157166  |
| H  | 0.383922  | 4.944281  | 11.928261 |
| H  | -0.270417 | 6.722349  | 10.368268 |
| H  | 2.760611  | -2.630708 | 8.519974  |
| H  | 3.961664  | -0.523466 | 8.242451  |
| H  | 5.743071  | 4.252075  | 6.227922  |
| H  | 5.502765  | 2.665033  | 5.701332  |
| H  | 5.803884  | 10.251153 | 8.468420  |
| H  | 5.648619  | 9.768021  | 6.779889  |
| H  | 4.367736  | 11.658371 | 6.963085  |
| H  | 3.170262  | 10.379479 | 6.900163  |
| H  | 2.992194  | 12.434115 | 8.600926  |
| H  | 4.078796  | 11.492178 | 9.594226  |
| H  | 1.726268  | 11.190593 | 10.261115 |
| H  | 1.282890  | 10.671312 | 8.637896  |
| H  | 1.483646  | 8.790630  | 10.260938 |
| H  | 3.188406  | 9.170185  | 10.495533 |
| H  | 4.815194  | 8.099228  | 9.164678  |
| H  | 6.476651  | 7.912575  | 8.082651  |
| H  | 6.154604  | 5.989390  | 7.717322  |
| H  | 6.598607  | 7.356095  | 6.190872  |

|    |           |           |           |
|----|-----------|-----------|-----------|
| C  | 2.895033  | 3.440025  | 7.313781  |
| O  | 4.034434  | 4.244314  | 7.383415  |
| La | 5.507674  | 5.842990  | 7.212891  |
| O  | 4.409826  | 7.750995  | 7.752897  |
| Si | 3.659299  | 9.144806  | 7.431717  |
| O  | 3.077494  | 9.205198  | 5.842532  |
| Si | 4.085369  | 9.238883  | 4.541333  |
| O  | 5.610807  | 8.870443  | 5.108946  |
| Si | 6.632339  | 7.574034  | 4.860669  |
| O  | 7.497703  | 7.442932  | 6.316944  |
| Si | 8.783139  | 7.326991  | 7.347597  |
| N  | 10.107314 | 6.331012  | 6.937806  |
| C  | 3.142022  | 1.956838  | 7.606516  |
| C  | 3.851561  | 1.112891  | 6.536322  |
| C  | 5.351711  | 1.384816  | 6.335077  |
| C  | 5.665400  | 2.479348  | 5.313098  |
| C  | 7.074310  | 3.041069  | 5.407564  |
| O  | 7.263401  | 3.696614  | 6.695340  |
| B  | 7.861680  | 3.053363  | 7.727166  |
| O  | 5.838079  | 6.179307  | 4.851179  |
| O  | 7.938749  | 6.606201  | 8.629693  |
| Si | 8.339707  | 6.520117  | 10.287494 |
| O  | 7.697552  | 8.138807  | 3.714360  |
| Si | 8.199617  | 9.738225  | 3.785364  |
| O  | 8.839702  | 10.038320 | 5.283728  |
| Si | 8.810605  | 10.229083 | 6.919973  |
| O  | 9.391592  | 8.831668  | 7.645339  |
| O  | 9.385884  | 9.891775  | 2.662972  |
| Si | 9.722075  | 11.056713 | 1.488570  |
| O  | 6.997919  | 10.817404 | 3.428088  |
| Si | 5.706126  | 11.615723 | 4.114906  |
| O  | 4.292454  | 10.760440 | 3.901538  |
| O  | 5.527526  | 13.070001 | 3.356348  |
| O  | 5.992551  | 11.945803 | 5.704546  |
| Si | 5.962464  | 11.365695 | 7.258121  |
| O  | 7.301058  | 10.434843 | 7.539660  |
| O  | 9.831337  | 11.455472 | 7.287246  |
| Si | 10.200872 | 12.363186 | 8.662183  |
| O  | 6.109798  | 12.659198 | 8.278561  |
| O  | 4.599686  | 10.527950 | 7.616654  |
| O  | 3.554910  | 8.253804  | 3.343666  |
| Si | 2.669527  | 6.814956  | 3.290357  |
| O  | 2.337986  | 9.380938  | 8.402495  |
| Si | 1.729726  | 10.739432 | 9.176186  |
| H  | 11.049394 | 10.693896 | 0.914982  |
| H  | 2.591947  | 11.122447 | 10.335139 |
| H  | 8.683428  | 11.026985 | 0.417762  |
| H  | 11.680042 | 12.302271 | 8.848788  |
| H  | 9.517111  | 11.806432 | 9.865082  |
| H  | 5.464381  | 13.356583 | 8.129937  |
| H  | 1.623568  | 11.902246 | 8.242689  |
| H  | 0.369244  | 10.380326 | 9.673421  |
| H  | 9.641198  | 5.816592  | 10.460996 |
| H  | 4.916102  | 13.041139 | 2.614404  |
| H  | 1.314645  | 7.131106  | 2.748786  |
| H  | 9.779092  | 13.772694 | 8.430186  |
| H  | 8.395132  | 7.889427  | 10.865789 |
| H  | 7.235607  | 5.731225  | 10.906099 |
| H  | 3.371689  | 5.881178  | 2.367248  |
| H  | 2.532508  | 6.210326  | 4.645707  |
| H  | 9.784731  | 12.417424 | 2.096572  |
| H  | 9.959495  | 5.369836  | 6.669918  |
| H  | 10.865654 | 6.757740  | 6.424560  |

|   |          |          |          |
|---|----------|----------|----------|
| H | 4.952415 | 3.301856 | 5.417116 |
| H | 5.543739 | 2.088192 | 4.294658 |
| H | 5.857059 | 0.460265 | 6.026815 |
| H | 5.778190 | 1.645532 | 7.313956 |
| H | 3.732620 | 0.060338 | 6.821990 |
| H | 3.325244 | 1.219027 | 5.576811 |
| H | 2.157300 | 1.502315 | 7.784414 |
| H | 3.688938 | 1.878317 | 8.556825 |
| H | 2.145327 | 3.802346 | 8.035628 |
| H | 2.428548 | 3.528564 | 6.316458 |
| H | 7.236853 | 3.813523 | 4.653191 |
| H | 7.836190 | 2.258830 | 5.316094 |
| H | 8.402933 | 1.999322 | 7.559124 |
| H | 7.836374 | 3.613914 | 8.785107 |

TS<sub>B→BCro</sub>

77

|    |           |           |           |
|----|-----------|-----------|-----------|
| O  | 9.305477  | 9.280189  | 7.695035  |
| O  | 8.624857  | 10.450386 | 5.350371  |
| Si | 8.597610  | 10.624530 | 6.990036  |
| H  | 9.275138  | 8.484205  | 0.849258  |
| O  | 6.708278  | 11.071999 | 3.527314  |
| Si | 7.976577  | 10.076526 | 3.875127  |
| O  | 9.113103  | 10.307620 | 2.713090  |
| O  | 7.576862  | 8.440646  | 3.841361  |
| O  | 7.078890  | 10.688454 | 7.623380  |
| Si | 5.693002  | 11.561243 | 7.387227  |
| O  | 5.665554  | 12.171484 | 5.845158  |
| Si | 5.408163  | 11.821657 | 4.254665  |
| O  | 4.043677  | 10.884051 | 4.082098  |
| Si | 3.954603  | 9.348859  | 4.706199  |
| O  | 3.515274  | 8.337705  | 3.492014  |
| O  | 2.939809  | 9.219223  | 5.997056  |
| H  | 2.278308  | 11.204683 | 10.440213 |
| Si | 3.505341  | 9.225330  | 7.591321  |
| O  | 4.317710  | 7.871116  | 7.948727  |
| O  | 5.832508  | 6.406132  | 5.039583  |
| Si | 6.575560  | 7.829154  | 5.023941  |
| O  | 4.381107  | 10.649116 | 7.760381  |
| O  | 5.500451  | 9.081714  | 5.286008  |
| O  | 7.484587  | 7.732649  | 6.455202  |
| Si | 8.756906  | 7.733243  | 7.522080  |
| O  | 7.902806  | 7.072157  | 8.825168  |
| Si | 8.431186  | 6.762139  | 10.420098 |
| La | 5.590627  | 6.089604  | 7.422355  |
| O  | 7.064506  | 3.916238  | 6.406144  |
| B  | 7.831015  | 3.506533  | 7.728478  |
| N  | 10.106233 | 6.738792  | 7.239241  |
| O  | 9.505622  | 11.937809 | 7.351605  |
| Si | 9.870795  | 12.815607 | 8.747008  |
| O  | 5.790757  | 12.846949 | 8.423619  |
| O  | 5.177913  | 13.275841 | 3.514001  |
| Si | 10.093478 | 9.270970  | 1.817276  |
| Si | 2.698324  | 6.866171  | 3.382955  |
| O  | 2.166720  | 9.406059  | 8.548297  |
| Si | 1.463303  | 10.745896 | 9.275058  |
| O  | 4.186556  | 4.375988  | 7.297506  |
| C  | 2.864270  | 3.928587  | 7.191513  |
| C  | 2.720080  | 2.408439  | 7.270648  |
| C  | 3.592396  | 1.664553  | 6.251043  |
| C  | 5.028849  | 1.407538  | 6.749140  |
| C  | 6.149989  | 1.783185  | 5.739736  |
| C  | 6.321254  | 3.247796  | 5.653998  |

|   |           |           |           |
|---|-----------|-----------|-----------|
| H | 11.353743 | 12.799151 | 8.912765  |
| H | 9.222774  | 12.205161 | 9.943455  |
| H | 5.164487  | 13.552390 | 8.235741  |
| H | 1.308781  | 11.876020 | 8.309504  |
| H | 0.116687  | 10.317161 | 9.754661  |
| H | 9.496833  | 5.723306  | 10.421452 |
| H | 5.302472  | 13.255428 | 2.560646  |
| H | 1.369893  | 7.122308  | 2.751646  |
| H | 9.400489  | 14.216186 | 8.557947  |
| H | 8.923351  | 8.025564  | 11.034769 |
| H | 7.219531  | 6.265835  | 11.133343 |
| H | 3.494770  | 5.960049  | 2.507973  |
| H | 2.499392  | 6.250279  | 4.724831  |
| H | 11.059972 | 10.134957 | 1.082463  |
| H | 10.836511 | 8.337666  | 2.716907  |
| H | 9.996877  | 5.734259  | 7.213953  |
| H | 10.869861 | 7.077381  | 6.673867  |
| H | 5.902311  | 1.397736  | 4.745314  |
| H | 7.093958  | 1.345854  | 6.078040  |
| H | 5.169902  | 0.346479  | 6.980582  |
| H | 5.211756  | 1.958063  | 7.674451  |
| H | 3.129621  | 0.704117  | 5.997339  |
| H | 3.603090  | 2.239285  | 5.315158  |
| H | 1.662129  | 2.167928  | 7.102468  |
| H | 2.958327  | 2.060182  | 8.284594  |
| H | 2.238676  | 4.380931  | 7.978612  |
| H | 2.435161  | 4.257146  | 6.228701  |
| H | 5.817469  | 3.844972  | 4.887061  |
| H | 7.706532  | 2.334728  | 7.963605  |
| H | 8.965562  | 3.879891  | 7.545056  |
| H | 7.256693  | 4.203773  | 8.564430  |

**BC<sub>77</sub>**

77

|    |           |           |           |
|----|-----------|-----------|-----------|
| C  | 2.915139  | 3.971335  | 7.099391  |
| O  | 4.287307  | 4.233779  | 7.070269  |
| La | 5.927947  | 5.722203  | 6.989208  |
| O  | 4.722138  | 7.520205  | 7.613172  |
| Si | 3.814329  | 8.824922  | 7.314064  |
| O  | 3.257918  | 8.860917  | 5.714582  |
| Si | 4.293117  | 9.106115  | 4.457132  |
| O  | 5.835670  | 8.907152  | 5.068548  |
| Si | 6.945053  | 7.689413  | 4.775612  |
| O  | 7.814011  | 7.515442  | 6.219074  |
| Si | 9.059142  | 7.515089  | 7.312296  |
| N  | 10.485648 | 6.639929  | 6.987812  |
| C  | 2.555714  | 2.600102  | 7.677773  |
| C  | 2.907009  | 1.361880  | 6.843242  |
| C  | 4.405663  | 1.043342  | 6.712749  |
| C  | 5.082617  | 1.776419  | 5.509862  |
| C  | 6.484140  | 1.972388  | 5.897603  |
| O  | 6.926597  | 3.097873  | 6.181912  |
| B  | 8.288805  | 3.399910  | 6.920548  |
| O  | 6.217246  | 6.259994  | 4.676964  |
| O  | 8.226463  | 6.724418  | 8.554323  |
| Si | 8.788961  | 6.327468  | 10.114472 |
| O  | 7.963198  | 8.390237  | 3.660740  |
| Si | 8.296787  | 10.028292 | 3.793249  |
| O  | 8.874300  | 10.352383 | 5.311467  |
| Si | 8.803032  | 10.431604 | 6.955935  |
| O  | 9.520206  | 9.071966  | 7.616402  |
| O  | 9.479470  | 10.331883 | 2.696254  |
| Si | 9.813262  | 11.644032 | 1.691056  |

|    |           |           |           |
|----|-----------|-----------|-----------|
| O  | 7.003556  | 11.003034 | 3.443984  |
| Si | 5.646216  | 11.653249 | 4.163556  |
| O  | 4.321901  | 10.675148 | 3.907638  |
| O  | 5.343571  | 13.125405 | 3.481796  |
| O  | 5.881269  | 11.951799 | 5.767259  |
| Si | 5.865876  | 11.275419 | 7.283334  |
| O  | 7.266993  | 10.438797 | 7.548451  |
| O  | 9.671210  | 11.744790 | 7.412453  |
| Si | 10.006289 | 12.513023 | 8.877136  |
| O  | 5.869000  | 12.523493 | 8.369970  |
| O  | 4.570762  | 10.305356 | 7.557581  |
| O  | 3.937929  | 8.139582  | 3.181819  |
| Si | 3.355291  | 6.570804  | 2.961693  |
| O  | 2.457017  | 8.858433  | 8.263926  |
| Si | 1.630033  | 10.110893 | 9.014610  |
| H  | 11.189282 | 11.425384 | 1.160654  |
| H  | 2.389520  | 10.616020 | 10.197950 |
| H  | 8.839357  | 11.688919 | 0.560914  |
| H  | 11.482954 | 12.465181 | 9.089487  |
| H  | 9.312986  | 11.831550 | 10.008124 |
| H  | 5.251549  | 13.229072 | 8.155380  |
| H  | 1.374671  | 11.244689 | 8.074929  |
| H  | 0.325255  | 9.548833  | 9.473530  |
| H  | 9.775454  | 5.213842  | 10.040816 |
| H  | 4.981034  | 13.076041 | 2.592352  |
| H  | 2.054297  | 6.685074  | 2.235555  |
| H  | 9.560254  | 13.930813 | 8.773982  |
| H  | 9.398490  | 7.525847  | 10.754032 |
| H  | 7.577876  | 5.886913  | 10.865272 |
| H  | 4.322806  | 5.814090  | 2.121077  |
| H  | 3.125467  | 5.876614  | 4.260150  |
| H  | 9.759250  | 12.925515 | 2.453448  |
| H  | 10.419118 | 5.660104  | 6.750187  |
| H  | 11.225773 | 7.111380  | 6.487942  |
| H  | 4.623197  | 2.751835  | 5.349390  |
| H  | 5.013433  | 1.150623  | 4.613299  |
| H  | 4.560540  | -0.033669 | 6.588007  |
| H  | 4.896093  | 1.325189  | 7.652430  |
| H  | 2.435509  | 0.493007  | 7.319412  |
| H  | 2.454892  | 1.438755  | 5.844980  |
| H  | 1.469262  | 2.590054  | 7.840232  |
| H  | 3.015885  | 2.509139  | 8.671551  |
| H  | 2.392366  | 4.733346  | 7.699790  |
| H  | 2.488042  | 4.041444  | 6.081903  |
| H  | 7.156318  | 1.115604  | 6.047741  |
| H  | 8.881888  | 2.362198  | 7.079422  |
| H  | 8.831607  | 4.218246  | 6.213951  |
| H  | 7.890815  | 3.886259  | 7.972780  |

TS<sub>BCro→C</sub>

77

|    |           |          |          |
|----|-----------|----------|----------|
| C  | 2.783226  | 3.545595 | 7.723403 |
| O  | 3.983258  | 4.254833 | 7.828472 |
| La | 5.479423  | 5.819801 | 7.538504 |
| O  | 4.362779  | 7.743394 | 7.925880 |
| Si | 3.588086  | 9.105945 | 7.529619 |
| O  | 2.981994  | 9.057064 | 5.948779 |
| Si | 3.979027  | 9.038269 | 4.638671 |
| O  | 5.507815  | 8.692715 | 5.208590 |
| Si | 6.527800  | 7.384437 | 5.035675 |
| O  | 7.414847  | 7.350715 | 6.482040 |
| Si | 8.725299  | 7.260626 | 7.493366 |
| N  | 10.046074 | 6.258814 | 7.138515 |

|    |           |           |           |
|----|-----------|-----------|-----------|
| C  | 2.934206  | 2.164388  | 7.069315  |
| C  | 3.739335  | 2.207574  | 5.762459  |
| C  | 5.243998  | 2.104323  | 6.046198  |
| C  | 6.153063  | 2.788340  | 5.003152  |
| C  | 7.427941  | 3.249888  | 5.579733  |
| O  | 7.467197  | 3.957803  | 6.629955  |
| B  | 8.478593  | 2.904688  | 7.485639  |
| O  | 5.731738  | 5.991222  | 5.123509  |
| O  | 7.891081  | 6.572681  | 8.808386  |
| Si | 8.428798  | 6.343798  | 10.417126 |
| O  | 7.573343  | 7.871036  | 3.836369  |
| Si | 8.076427  | 9.472872  | 3.811289  |
| O  | 8.725242  | 9.861122  | 5.284135  |
| Si | 8.716352  | 10.140917 | 6.909128  |
| O  | 9.307487  | 8.791092  | 7.707421  |
| O  | 9.251746  | 9.555366  | 2.669721  |
| Si | 9.620961  | 10.683413 | 1.469856  |
| O  | 6.871155  | 10.529907 | 3.400368  |
| Si | 5.602641  | 11.385177 | 4.064520  |
| O  | 4.181125  | 10.526936 | 3.926941  |
| O  | 5.427177  | 12.799699 | 3.234166  |
| O  | 5.914968  | 11.811038 | 5.625027  |
| Si | 5.884289  | 11.315174 | 7.208239  |
| O  | 7.214020  | 10.387977 | 7.533469  |
| O  | 9.739269  | 11.389232 | 7.188438  |
| Si | 10.153313 | 12.344426 | 8.517749  |
| O  | 6.039932  | 12.660372 | 8.157298  |
| O  | 4.514132  | 10.507142 | 7.607725  |
| O  | 3.433119  | 7.999397  | 3.492309  |
| Si | 2.456885  | 6.622256  | 3.513433  |
| O  | 2.279024  | 9.384101  | 8.504223  |
| Si | 1.678882  | 10.774423 | 9.227627  |
| H  | 10.946206 | 10.282608 | 0.917471  |
| H  | 2.563827  | 11.215001 | 10.348100 |
| H  | 8.591010  | 10.643692 | 0.390691  |
| H  | 11.627130 | 12.221274 | 8.716777  |
| H  | 9.438153  | 11.887772 | 9.744153  |
| H  | 5.403353  | 13.355680 | 7.966638  |
| H  | 1.545320  | 11.890687 | 8.242536  |
| H  | 0.331903  | 10.430318 | 9.769844  |
| H  | 9.663824  | 5.514683  | 10.434508 |
| H  | 4.931825  | 12.710258 | 2.414629  |
| H  | 1.104277  | 6.995501  | 3.004958  |
| H  | 9.803415  | 13.758956 | 8.208382  |
| H  | 8.662755  | 7.666626  | 11.057266 |
| H  | 7.304412  | 5.627243  | 11.086135 |
| H  | 3.074546  | 5.621005  | 2.598413  |
| H  | 2.336025  | 6.059872  | 4.888384  |
| H  | 9.701206  | 12.058558 | 2.042271  |
| H  | 9.956822  | 5.252428  | 7.116394  |
| H  | 10.824629 | 6.618754  | 6.608550  |
| H  | 5.691236  | 3.741405  | 4.676571  |
| H  | 6.333028  | 2.179849  | 4.113237  |
| H  | 5.544403  | 1.054167  | 6.137896  |
| H  | 5.430305  | 2.566280  | 7.017383  |
| H  | 3.427645  | 1.402939  | 5.086143  |
| H  | 3.521496  | 3.149280  | 5.241579  |
| H  | 1.925716  | 1.771906  | 6.886837  |
| H  | 3.413703  | 1.466780  | 7.769664  |
| H  | 2.326685  | 3.418121  | 8.717711  |
| H  | 2.064116  | 4.128801  | 7.122880  |
| H  | 8.376115  | 3.074181  | 5.054071  |
| H  | 8.308873  | 1.814147  | 6.957582  |

|   |          |          |          |
|---|----------|----------|----------|
| H | 9.597110 | 3.334548 | 7.364993 |
| H | 7.941076 | 2.925439 | 8.562827 |

TS<sub>BCro→BC'ro</sub>

77

|    |           |           |           |
|----|-----------|-----------|-----------|
| C  | 2.935683  | 3.738447  | 7.488506  |
| C  | 2.974230  | 2.206764  | 7.433542  |
| C  | 3.867280  | 1.677487  | 6.302785  |
| C  | 5.296989  | 1.428675  | 6.791745  |
| C  | 6.357453  | 1.321111  | 5.660971  |
| C  | 6.616487  | 2.658269  | 5.081963  |
| O  | 7.336048  | 3.535389  | 5.587750  |
| B  | 8.156337  | 3.501851  | 6.929392  |
| O  | 4.200985  | 4.332733  | 7.489344  |
| La | 5.540537  | 6.066878  | 7.285243  |
| O  | 5.784642  | 6.460104  | 4.929346  |
| Si | 6.571083  | 7.860086  | 4.956497  |
| O  | 7.579709  | 8.491844  | 3.791189  |
| Si | 8.005854  | 10.118390 | 3.892576  |
| O  | 9.169070  | 10.372857 | 2.762133  |
| Si | 10.167744 | 9.351362  | 1.868888  |
| O  | 6.761334  | 11.146723 | 3.554604  |
| Si | 5.438575  | 11.868948 | 4.268367  |
| O  | 5.216937  | 13.339283 | 3.557049  |
| O  | 8.631988  | 10.424640 | 5.393719  |
| Si | 8.573844  | 10.574597 | 7.035048  |
| O  | 9.493385  | 11.868489 | 7.436614  |
| Si | 9.836287  | 12.720041 | 8.853670  |
| O  | 5.658016  | 12.184458 | 5.871825  |
| Si | 5.670550  | 11.542697 | 7.401351  |
| O  | 5.770176  | 12.810277 | 8.460097  |
| O  | 4.082281  | 10.929966 | 4.040453  |
| Si | 3.982287  | 9.390848  | 4.653452  |
| O  | 3.570458  | 8.381967  | 3.427763  |
| Si | 2.857118  | 6.856221  | 3.315952  |
| O  | 4.348951  | 10.634588 | 7.749389  |
| Si | 3.482228  | 9.213004  | 7.525880  |
| O  | 2.128291  | 9.362112  | 8.466356  |
| Si | 1.393756  | 10.682194 | 9.198345  |
| O  | 7.043950  | 10.650688 | 7.636742  |
| O  | 9.245470  | 9.210373  | 7.738128  |
| Si | 8.710530  | 7.668051  | 7.493379  |
| O  | 7.802574  | 6.973522  | 8.750491  |
| Si | 8.356535  | 6.627082  | 10.332372 |
| N  | 10.079081 | 6.686413  | 7.254910  |
| O  | 7.489512  | 7.690030  | 6.373232  |
| O  | 5.520133  | 9.125779  | 5.260754  |
| O  | 4.293395  | 7.851214  | 7.853835  |
| O  | 2.942860  | 9.251388  | 5.923080  |
| H  | 10.867665 | 8.380745  | 2.763352  |
| H  | 2.177434  | 11.131258 | 10.388496 |
| H  | 9.373906  | 8.606552  | 0.848654  |
| H  | 11.315075 | 12.685371 | 9.051374  |
| H  | 9.156207  | 12.097558 | 10.025832 |
| H  | 5.171310  | 13.535902 | 8.260051  |
| H  | 1.247021  | 11.825881 | 8.247695  |
| H  | 0.041919  | 10.230879 | 9.641467  |
| H  | 9.115134  | 5.345466  | 10.331274 |
| H  | 5.346542  | 13.337975 | 2.604142  |
| H  | 1.532024  | 7.030414  | 2.649250  |
| H  | 9.384970  | 14.128555 | 8.677382  |
| H  | 9.203658  | 7.747165  | 10.823856 |
| H  | 7.120977  | 6.488217  | 11.154710 |

|   |           |           |          |
|---|-----------|-----------|----------|
| H | 3.723937  | 5.990612  | 2.469062 |
| H | 2.649543  | 6.239630  | 4.657387 |
| H | 11.169505 | 10.224964 | 1.194949 |
| H | 9.951647  | 5.696399  | 7.085835 |
| H | 10.871767 | 7.072707  | 6.763630 |
| H | 6.007809  | 0.649840  | 4.870342 |
| H | 7.290522  | 0.936108  | 6.083691 |
| H | 5.337506  | 0.495353  | 7.364673 |
| H | 5.592233  | 2.231865  | 7.470818 |
| H | 3.461801  | 0.748107  | 5.883721 |
| H | 3.862561  | 2.409382  | 5.483409 |
| H | 1.943797  | 1.851121  | 7.308581 |
| H | 3.324228  | 1.807637  | 8.395340 |
| H | 2.363311  | 4.043041  | 8.379612 |
| H | 2.359738  | 4.089702  | 6.614057 |
| H | 6.133620  | 2.959634  | 4.145229 |
| H | 8.055223  | 2.439123  | 7.483053 |
| H | 9.279510  | 3.795282  | 6.591989 |
| H | 7.647910  | 4.406240  | 7.584195 |

**BC'**<sub>ro</sub>

|    |           |           |           |
|----|-----------|-----------|-----------|
| 77 |           |           |           |
| Si | 10.069939 | 8.196161  | 2.103637  |
| O  | 9.437183  | 9.485199  | 2.989222  |
| O  | 9.755660  | 11.315084 | 7.539619  |
| Si | 10.182337 | 12.231107 | 8.895889  |
| O  | 6.364712  | 13.466671 | 3.168127  |
| O  | 6.327546  | 12.469426 | 5.588756  |
| O  | 4.615963  | 11.473296 | 3.705406  |
| Si | 6.044872  | 12.000691 | 7.153532  |
| O  | 6.466364  | 13.262462 | 8.135230  |
| Si | 6.143247  | 12.064273 | 4.001455  |
| H  | 9.238600  | 11.976906 | 10.021477 |
| O  | 7.276437  | 10.953399 | 3.494180  |
| O  | 8.730877  | 9.903838  | 5.541340  |
| Si | 8.163534  | 9.663542  | 4.004299  |
| O  | 8.813343  | 8.843175  | 8.024833  |
| Si | 8.574665  | 10.257119 | 7.144965  |
| O  | 7.293476  | 8.218403  | 3.954575  |
| Si | 7.946362  | 7.467343  | 7.770051  |
| O  | 6.836623  | 7.731659  | 6.574359  |
| Si | 6.078494  | 7.966367  | 5.056255  |
| O  | 5.354153  | 9.467391  | 5.232456  |
| O  | 7.063967  | 10.759644 | 7.567591  |
| O  | 4.488499  | 11.567510 | 7.431201  |
| O  | 2.890958  | 10.430695 | 5.583966  |
| Si | 3.219923  | 10.480859 | 7.240851  |
| O  | 1.905725  | 11.187122 | 7.950811  |
| O  | 3.510405  | 9.001400  | 7.829994  |
| Si | 2.322829  | 7.835433  | 3.253714  |
| O  | 3.433828  | 9.111381  | 3.274569  |
| Si | 4.023196  | 10.106897 | 4.434545  |
| O  | 4.970711  | 6.811754  | 5.116578  |
| O  | 6.799829  | 7.060758  | 8.965928  |
| Si | 7.160949  | 6.570252  | 10.574468 |
| N  | 9.054173  | 6.177663  | 7.661024  |
| La | 4.483137  | 6.994485  | 7.492750  |
| O  | 3.478360  | 5.235252  | 8.289323  |
| C  | 2.717360  | 4.162464  | 8.751261  |
| C  | 2.854736  | 2.938195  | 7.844161  |
| C  | 2.089912  | 1.701643  | 8.324981  |
| C  | 0.564605  | 1.821417  | 8.237363  |
| C  | -0.158548 | 0.553176  | 8.686846  |



|    |           |           |           |
|----|-----------|-----------|-----------|
| C  | -0.102341 | 0.301422  | 10.143879 |
| O  | -0.534972 | -0.714999 | 10.697334 |
| B  | -1.228131 | -1.932168 | 9.911416  |
| Si | 1.565389  | 12.766126 | 8.412768  |
| H  | 1.929693  | 7.435541  | 4.637322  |
| H  | 10.400616 | 7.055973  | 3.010356  |
| H  | 2.304405  | 13.117146 | 9.662855  |
| H  | 9.096082  | 7.747559  | 1.067343  |
| H  | 11.562721 | 11.823925 | 9.289126  |
| H  | 6.092671  | 14.110636 | 7.877866  |
| H  | 1.930830  | 13.737479 | 7.337711  |
| H  | 0.097630  | 12.833861 | 8.669060  |
| H  | 7.397627  | 5.099878  | 10.587804 |
| H  | 6.383496  | 13.366537 | 2.211827  |
| H  | 1.110197  | 8.307254  | 2.522611  |
| H  | 10.167230 | 13.669152 | 8.511295  |
| H  | 8.357127  | 7.312210  | 11.053164 |
| H  | 5.950353  | 6.911776  | 11.370125 |
| H  | 2.940750  | 6.692750  | 2.530212  |
| H  | 11.312625 | 8.703318  | 1.457689  |
| H  | 8.748731  | 5.238296  | 7.454394  |
| H  | 9.977986  | 6.372053  | 7.302511  |
| H  | 0.214642  | -0.354536 | 8.187576  |
| H  | -1.230185 | 0.557913  | 8.427057  |
| H  | 0.279386  | 2.038593  | 7.201624  |
| H  | 0.207964  | 2.672693  | 8.831396  |
| H  | 2.402642  | 0.833342  | 7.730559  |
| H  | 2.387004  | 1.473685  | 9.360303  |
| H  | 3.922318  | 2.695458  | 7.769677  |
| H  | 2.528193  | 3.210286  | 6.831309  |
| H  | 3.032950  | 3.883564  | 9.771981  |
| H  | 1.658436  | 4.459512  | 8.824037  |
| H  | 0.331198  | 1.062458  | 10.809217 |
| H  | -0.377660 | -2.323672 | 9.133585  |
| H  | -1.519312 | -2.715654 | 10.775581 |
| H  | -2.173187 | -1.425852 | 9.336535  |

TS<sub>BCRO→C</sub>

77

|    |           |           |           |
|----|-----------|-----------|-----------|
| Si | 9.984884  | 8.182439  | 2.076240  |
| O  | 9.386312  | 9.471172  | 2.985434  |
| O  | 9.739456  | 11.283395 | 7.540221  |
| Si | 10.182707 | 12.186129 | 8.899952  |
| O  | 6.359421  | 13.487684 | 3.185943  |
| O  | 6.313650  | 12.481364 | 5.602615  |
| O  | 4.589269  | 11.511875 | 3.716418  |
| Si | 6.031982  | 12.010878 | 7.167091  |
| O  | 6.469493  | 13.265022 | 8.151583  |
| Si | 6.123157  | 12.084534 | 4.014137  |
| H  | 9.235940  | 11.943185 | 10.025458 |
| O  | 7.243733  | 10.963269 | 3.501248  |
| O  | 8.692954  | 9.890773  | 5.540303  |
| Si | 8.117433  | 9.661777  | 4.004695  |
| O  | 8.769819  | 8.821254  | 8.020173  |
| Si | 8.544818  | 10.240734 | 7.145478  |
| O  | 7.231153  | 8.226703  | 3.953018  |
| Si | 7.885042  | 7.457295  | 7.762126  |
| O  | 6.773507  | 7.742599  | 6.573029  |
| Si | 6.015137  | 7.985610  | 5.056315  |
| O  | 5.306665  | 9.493429  | 5.235735  |
| O  | 7.041417  | 10.759476 | 7.573652  |
| O  | 4.472653  | 11.592135 | 7.449245  |
| O  | 2.857049  | 10.487061 | 5.598332  |

|    |           |           |           |
|----|-----------|-----------|-----------|
| Si | 3.189558  | 10.522719 | 7.254994  |
| O  | 1.886305  | 11.242898 | 7.970903  |
| O  | 3.462495  | 9.036625  | 7.835100  |
| Si | 2.241758  | 7.910374  | 3.263153  |
| O  | 3.375110  | 9.166568  | 3.283843  |
| Si | 3.981001  | 10.151471 | 4.444427  |
| O  | 4.897713  | 6.840553  | 5.116253  |
| O  | 6.739535  | 7.057327  | 8.960725  |
| Si | 7.099336  | 6.556904  | 10.566358 |
| N  | 8.977109  | 6.155100  | 7.640253  |
| La | 4.416163  | 7.020310  | 7.493887  |
| O  | 3.406937  | 5.257673  | 8.273516  |
| C  | 2.657640  | 4.165683  | 8.710474  |
| C  | 3.107584  | 2.868799  | 8.035327  |
| C  | 2.375988  | 1.611202  | 8.515200  |
| C  | 0.893651  | 1.569455  | 8.127547  |
| C  | 0.192106  | 0.213932  | 8.391024  |
| C  | 0.118610  | -0.056707 | 9.858073  |
| O  | -0.888850 | 0.121321  | 10.559570 |
| B  | -1.740020 | -1.388274 | 10.047538 |
| Si | 1.574615  | 12.819406 | 8.460047  |
| H  | 1.851763  | 7.508400  | 4.646881  |
| H  | 10.302231 | 7.023722  | 2.964027  |
| H  | 2.324585  | 13.138239 | 9.712297  |
| H  | 8.992889  | 7.766520  | 1.043436  |
| H  | 11.556496 | 11.754433 | 9.290391  |
| H  | 6.091901  | 14.115217 | 7.906924  |
| H  | 1.952230  | 13.801935 | 7.399267  |
| H  | 0.109309  | 12.908064 | 8.723424  |
| H  | 7.320517  | 5.084010  | 10.573303 |
| H  | 6.368237  | 13.391997 | 2.229049  |
| H  | 1.032608  | 8.406193  | 2.542347  |
| H  | 10.191591 | 13.625817 | 8.521291  |
| H  | 8.305156  | 7.283649  | 11.044424 |
| H  | 5.894935  | 6.908317  | 11.366881 |
| H  | 2.836444  | 6.762023  | 2.528898  |
| H  | 11.230979 | 8.674068  | 1.424744  |
| H  | 8.658877  | 5.220884  | 7.429606  |
| H  | 9.900602  | 6.340646  | 7.276261  |
| H  | 0.764924  | -0.588754 | 7.910947  |
| H  | -0.820585 | 0.224233  | 7.982407  |
| H  | 0.798326  | 1.771031  | 7.053531  |
| H  | 0.333853  | 2.361108  | 8.638197  |
| H  | 2.875832  | 0.729758  | 8.091663  |
| H  | 2.487448  | 1.527488  | 9.605359  |
| H  | 4.183221  | 2.751355  | 8.220316  |
| H  | 2.989331  | 2.977815  | 6.948556  |
| H  | 2.753458  | 4.049894  | 9.804045  |
| H  | 1.588811  | 4.342266  | 8.509836  |
| H  | 1.068809  | -0.319111 | 10.362162 |
| H  | -0.848444 | -2.085119 | 9.593439  |
| H  | -2.084202 | -1.731088 | 11.143247 |
| H  | -2.538011 | -0.992235 | 9.244628  |

C' :

77

|    |           |           |          |
|----|-----------|-----------|----------|
| Si | 10.315038 | 8.324846  | 2.379634 |
| O  | 9.601290  | 9.564707  | 3.272837 |
| O  | 9.511618  | 11.231344 | 7.906928 |
| Si | 9.805171  | 12.077795 | 9.341019 |
| O  | 6.412268  | 13.462306 | 3.339962 |
| O  | 6.211495  | 12.387298 | 5.718427 |
| O  | 4.692803  | 11.400713 | 3.667836 |

|    |           |           |           |
|----|-----------|-----------|-----------|
| Si | 5.833234  | 11.852972 | 7.241823  |
| O  | 6.162708  | 13.084643 | 8.294962  |
| Si | 6.169510  | 12.027329 | 4.110363  |
| H  | 8.781982  | 11.740595 | 10.371482 |
| O  | 7.376681  | 10.968831 | 3.667183  |
| O  | 8.704153  | 9.873871  | 5.778004  |
| Si | 8.252160  | 9.678984  | 4.196728  |
| O  | 8.594502  | 8.722428  | 8.221280  |
| Si | 8.397414  | 10.160921 | 7.373450  |
| O  | 7.422968  | 8.220580  | 4.028828  |
| Si | 7.774284  | 7.339014  | 7.868962  |
| O  | 6.773949  | 7.604530  | 6.579838  |
| Si | 6.131270  | 7.894086  | 5.019208  |
| O  | 5.359808  | 9.372964  | 5.201989  |
| O  | 6.843445  | 10.612999 | 7.679126  |
| O  | 4.270305  | 11.384377 | 7.394900  |
| O  | 2.855875  | 10.279953 | 5.386197  |
| Si | 3.049154  | 10.275874 | 7.065395  |
| O  | 1.665505  | 10.932062 | 7.687395  |
| O  | 3.327168  | 8.783994  | 7.624716  |
| Si | 2.548490  | 7.704403  | 2.986296  |
| O  | 3.601028  | 9.025239  | 3.096016  |
| Si | 4.078370  | 10.004572 | 4.320014  |
| O  | 5.048138  | 6.719369  | 4.934817  |
| O  | 6.532925  | 6.893929  | 8.947851  |
| Si | 6.730439  | 6.403733  | 10.584798 |
| N  | 8.909989  | 6.069145  | 7.838844  |
| La | 4.360094  | 6.803404  | 7.279034  |
| O  | 3.389438  | 4.997225  | 7.986295  |
| C  | 2.667055  | 3.875276  | 8.402480  |
| C  | 2.497931  | 2.861208  | 7.271010  |
| C  | 1.787927  | 1.566246  | 7.679306  |
| C  | 0.320582  | 1.750261  | 8.079979  |
| C  | -0.443673 | 0.441444  | 8.299683  |
| C  | 0.048108  | -0.405134 | 9.465630  |
| O  | -0.128729 | 0.295646  | 10.696966 |
| B  | 0.881405  | 0.520604  | 11.553609 |
| Si | 1.263923  | 12.482370 | 8.192949  |
| H  | 2.079908  | 7.269236  | 4.335624  |
| H  | 10.610402 | 7.153380  | 3.258204  |
| H  | 1.908037  | 12.791484 | 9.505119  |
| H  | 9.420117  | 7.902548  | 1.264005  |
| H  | 11.159988 | 11.679586 | 9.823001  |
| H  | 5.798486  | 13.936771 | 8.037091  |
| H  | 1.681776  | 13.507489 | 7.188972  |
| H  | -0.219132 | 12.514664 | 8.349614  |
| H  | 7.009398  | 4.941323  | 10.619716 |
| H  | 6.488399  | 13.395175 | 2.383634  |
| H  | 1.366887  | 8.142642  | 2.185891  |
| H  | 9.783816  | 13.534761 | 9.035864  |
| H  | 7.845801  | 7.177640  | 11.192150 |
| H  | 5.431677  | 6.706631  | 11.244628 |
| H  | 3.253236  | 6.598233  | 2.286819  |
| H  | 11.586508 | 8.879749  | 1.836621  |
| H  | 8.634670  | 5.126922  | 7.604503  |
| H  | 9.852951  | 6.280619  | 7.545948  |
| H  | -0.387742 | -0.179634 | 7.395061  |
| H  | -1.505402 | 0.661944  | 8.463065  |
| H  | -0.191911 | 2.320629  | 7.294029  |
| H  | 0.245603  | 2.357882  | 8.989589  |
| H  | 1.839016  | 0.859689  | 6.839364  |
| H  | 2.346391  | 1.096749  | 8.501310  |
| H  | 3.496902  | 2.622482  | 6.883401  |

|   |           |           |           |
|---|-----------|-----------|-----------|
| H | 1.952285  | 3.341943  | 6.447203  |
| H | 3.184369  | 3.385623  | 9.245279  |
| H | 1.680100  | 4.185725  | 8.779277  |
| H | 1.102489  | -0.686225 | 9.347578  |
| H | -0.542769 | -1.326159 | 9.529823  |
| H | 1.994170  | 0.129853  | 11.307334 |
| H | 0.614542  | 1.120081  | 12.555447 |

Study of the alternative mechanism of the  $\epsilon$ -CL ROP reaction with  $(\text{BH}_4)\text{La@c-1}$

$\text{TS}_{\text{AB} \rightarrow \text{Bro}}$

|    |           |           |           |
|----|-----------|-----------|-----------|
| 77 |           |           |           |
| Si | 3.511189  | 3.426981  | 5.225252  |
| O  | 2.331154  | 3.592223  | 6.378690  |
| Si | 1.889730  | 2.979677  | 7.904855  |
| O  | 0.244592  | 3.206435  | 7.872259  |
| O  | -1.462467 | 4.880311  | 5.687030  |
| O  | -0.837088 | 3.393478  | 10.416193 |
| Si | -1.098072 | 3.491422  | 8.800029  |
| O  | -1.641621 | 4.992475  | 8.381380  |
| Si | -1.113451 | 5.838772  | 7.018881  |
| O  | 0.438515  | 6.287455  | 7.129455  |
| O  | 2.666563  | 3.975858  | 8.888588  |
| O  | 2.779037  | 2.752307  | 3.904876  |
| Si | 1.260905  | 2.043092  | 4.020931  |
| O  | 1.285551  | 0.918098  | 5.230963  |
| Si | 1.113653  | 0.404620  | 6.793570  |
| O  | -0.473750 | 0.420747  | 7.243280  |
| Si | -1.878356 | 1.292948  | 7.038692  |
| H  | -3.222521 | 3.654429  | 3.599267  |
| O  | -2.137399 | 2.273104  | 8.359633  |
| Si | -1.357264 | 3.498334  | 4.808844  |
| O  | 2.077392  | 1.325292  | 7.818820  |
| O  | 0.190110  | 3.268231  | 4.272684  |
| La | 2.613869  | 6.015591  | 7.612825  |
| O  | 3.929024  | 5.057138  | 5.114105  |
| Si | 5.026641  | 5.764328  | 4.009389  |
| O  | 1.665614  | -1.138999 | 6.887550  |
| Si | 2.735521  | -1.935783 | 7.917175  |
| N  | 4.934161  | 2.536050  | 5.543869  |
| O  | 0.972687  | 1.236399  | 2.625210  |
| Si | 0.634418  | 1.660209  | 1.027060  |
| Si | -0.690510 | 4.529199  | 11.657046 |
| O  | -3.139113 | 0.240836  | 6.892815  |
| O  | -1.874208 | 2.164213  | 5.642149  |
| O  | -2.274093 | 3.638305  | 3.440269  |
| O  | -2.115747 | 7.153422  | 6.897490  |
| Si | -3.428788 | 7.475884  | 5.904060  |
| O  | 2.999351  | 7.510489  | 9.191756  |
| C  | 2.571747  | 8.369420  | 10.207338 |
| C  | 1.571473  | 9.421566  | 9.713726  |
| C  | 2.125452  | 10.591230 | 8.890354  |
| C  | 2.923937  | 10.234313 | 7.626461  |
| C  | 4.375345  | 9.832563  | 7.916179  |
| C  | 4.858219  | 8.538853  | 7.374479  |
| O  | 4.302013  | 7.799996  | 6.575945  |
| H  | -4.421912 | 6.358688  | 5.926577  |
| H  | 1.653392  | 0.997239  | 0.161751  |
| H  | -4.071236 | 8.716200  | 6.429782  |
| H  | 2.325086  | -1.769673 | 9.341816  |
| H  | 6.332491  | 5.980253  | 4.694109  |
| H  | -3.186694 | -0.419795 | 7.589985  |
| H  | -2.046456 | 4.973578  | 12.093537 |

|   |           |           |           |
|---|-----------|-----------|-----------|
| H | -2.987836 | 7.708373  | 4.495498  |
| H | -0.724504 | 1.157301  | 0.680878  |
| H | 5.198568  | 4.851679  | 2.844864  |
| H | 4.441767  | 7.061688  | 3.576282  |
| H | 0.702162  | 3.139003  | 0.843661  |
| H | 0.003640  | 3.840215  | 12.780913 |
| H | 0.105518  | 5.708235  | 11.210408 |
| H | 2.690420  | -3.375852 | 7.536670  |
| H | 4.121401  | -1.410528 | 7.730676  |
| H | 5.505764  | 2.754319  | 6.347194  |
| H | 4.918949  | 1.544425  | 5.350892  |
| H | 4.584774  | 9.783335  | 8.993396  |
| H | 5.097384  | 10.578941 | 7.544749  |
| H | 2.930432  | 11.099037 | 6.954142  |
| H | 2.415897  | 9.435134  | 7.076811  |
| H | 1.276311  | 11.216931 | 8.589807  |
| H | 2.749028  | 11.230003 | 9.532944  |
| H | 1.059544  | 9.846281  | 10.587993 |
| H | 0.800922  | 8.897138  | 9.132948  |
| H | 2.092739  | 7.789928  | 11.012872 |
| H | 3.435740  | 8.873846  | 10.679701 |
| H | 5.880771  | 8.250236  | 7.736724  |
| H | 7.834349  | 8.971510  | 8.787077  |
| H | 7.904499  | 7.178138  | 7.751579  |
| H | 7.954226  | 8.971928  | 6.719094  |
| B | 7.885566  | 8.374045  | 7.752472  |

**BC<sub>ro</sub> :**

|    |           |           |           |
|----|-----------|-----------|-----------|
| 77 |           |           |           |
| Si | 3.555690  | 3.171761  | 5.526221  |
| O  | 2.138784  | 3.368882  | 6.398713  |
| Si | 2.028152  | 2.829216  | 8.008312  |
| O  | 0.782565  | 3.795826  | 8.599921  |
| O  | 0.028697  | 4.911207  | 4.890100  |
| O  | -1.457783 | 4.476161  | 9.884361  |
| Si | -0.855438 | 4.035488  | 8.422342  |
| O  | -1.143743 | 5.211444  | 7.306657  |
| Si | -0.175028 | 5.978074  | 6.169640  |
| O  | 1.233613  | 6.479707  | 6.775062  |
| O  | 3.359784  | 3.399513  | 8.692576  |
| O  | 3.076706  | 2.696105  | 4.011531  |
| Si | 1.760048  | 1.677221  | 3.870220  |
| O  | 1.781587  | 0.702658  | 5.220251  |
| Si | 0.976755  | 0.363716  | 6.625988  |
| O  | -0.634301 | 0.642397  | 6.410537  |
| Si | -1.799689 | 1.816756  | 6.538566  |
| H  | -2.340102 | 3.573611  | 2.680856  |
| O  | -1.568787 | 2.608980  | 7.974525  |
| Si | -0.741955 | 3.632138  | 4.219527  |
| O  | 1.590567  | 1.230365  | 7.920805  |
| O  | 0.354390  | 2.505757  | 3.674996  |
| La | 3.015962  | 5.718351  | 7.975995  |
| O  | 4.198969  | 4.730727  | 5.588509  |
| Si | 5.548138  | 5.272893  | 4.682258  |
| O  | 1.201334  | -1.225411 | 6.964262  |
| Si | 1.705114  | -2.076714 | 8.331322  |
| N  | 4.753375  | 2.098403  | 6.115279  |
| O  | 1.996543  | 0.732188  | 2.550663  |
| Si | 1.177857  | 0.529592  | 1.089632  |
| Si | -2.547078 | 5.665170  | 10.381603 |
| O  | -3.286657 | 1.110553  | 6.495271  |
| O  | -1.770036 | 2.857309  | 5.266770  |
| O  | -1.630429 | 4.170172  | 2.937662  |

|    |           |           |           |
|----|-----------|-----------|-----------|
| O  | -1.099431 | 7.252400  | 5.626990  |
| Si | -0.707622 | 8.721976  | 4.918648  |
| O  | 3.002077  | 6.877588  | 9.825144  |
| C  | 2.809703  | 7.545418  | 11.034647 |
| C  | 2.417881  | 9.018024  | 10.871336 |
| C  | 3.510197  | 10.006976 | 10.440986 |
| C  | 4.108155  | 9.791558  | 9.041456  |
| C  | 5.275665  | 8.765427  | 9.049069  |
| C  | 5.518547  | 8.269725  | 7.670735  |
| O  | 5.006121  | 7.252467  | 7.206832  |
| H  | -0.281105 | 8.479301  | 3.518011  |
| H  | 1.931192  | -0.508481 | 0.331076  |
| H  | -1.915615 | 9.556863  | 5.114978  |
| H  | 0.830278  | -1.760815 | 9.498186  |
| H  | 6.741138  | 5.333880  | 5.573175  |
| H  | -3.452492 | 0.481248  | 7.203271  |
| H  | -3.822228 | 5.565477  | 9.613193  |
| H  | 0.578110  | 8.871030  | 5.965107  |
| H  | -0.219257 | 0.065177  | 1.335073  |
| H  | 5.790231  | 4.319180  | 3.564519  |
| H  | 5.217863  | 6.623264  | 4.152993  |
| H  | 1.155515  | 1.808282  | 0.321351  |
| H  | -2.804588 | 5.413966  | 11.828239 |
| H  | -1.952447 | 7.021726  | 10.202185 |
| H  | 1.592074  | -3.521854 | 7.986382  |
| H  | 3.122150  | -1.740955 | 8.657270  |
| H  | 4.974469  | 2.183642  | 7.100916  |
| H  | 4.684702  | 1.131256  | 5.829089  |
| H  | 4.995649  | 7.914591  | 9.674320  |
| H  | 6.180600  | 9.247669  | 9.435417  |
| H  | 4.478890  | 10.741570 | 8.640275  |
| H  | 3.316385  | 9.453574  | 8.363932  |
| H  | 3.072609  | 11.012722 | 10.462110 |
| H  | 4.318145  | 10.017593 | 11.186258 |
| H  | 2.025153  | 9.365183  | 11.837026 |
| H  | 1.580632  | 9.068889  | 10.162504 |
| H  | 2.015377  | 7.045397  | 11.610829 |
| H  | 3.721090  | 7.483687  | 11.658257 |
| H  | 6.166483  | 8.868788  | 7.004718  |
| H  | 0.576197  | 10.719420 | 6.612212  |
| H  | 1.992569  | 9.956917  | 5.286504  |
| H  | 0.171019  | 10.438269 | 4.673076  |
| B  | 0.850353  | 10.083490 | 5.633356  |

TS<sub>AB→B<sub>intra</sub></sub>  
77

|    |          |           |          |
|----|----------|-----------|----------|
| C  | 3.175218 | 8.710439  | 9.915277 |
| C  | 1.999438 | 9.629186  | 9.611034 |
| C  | 2.286995 | 10.740207 | 8.599015 |
| C  | 2.915986 | 10.281192 | 7.277964 |
| C  | 4.341824 | 9.740669  | 7.434870 |
| C  | 4.456608 | 8.251405  | 7.769768 |
| O  | 3.466711 | 7.841409  | 8.815873 |
| La | 2.415571 | 6.065212  | 7.299475 |
| O  | 4.194806 | 7.427730  | 6.734159 |
| Si | 2.866765 | 3.461514  | 5.010189 |
| O  | 3.182597 | 5.113250  | 4.828301 |
| Si | 4.145073 | 5.885883  | 3.628546 |
| O  | 1.845166 | 2.760928  | 3.921127 |
| Si | 0.284494 | 2.280167  | 4.312433 |
| O  | 0.352898 | 1.203348  | 5.561151 |
| Si | 0.219084 | 0.758101  | 7.149226 |
| O  | 1.384530 | 1.560281  | 8.063805 |

|    |           |           |           |
|----|-----------|-----------|-----------|
| Si | 1.486949  | 3.217794  | 8.008609  |
| O  | 2.366687  | 4.206543  | 8.904420  |
| O  | -0.347622 | 1.492364  | 3.025713  |
| Si | -0.760284 | 1.886567  | 1.435561  |
| O  | -0.518708 | 3.669742  | 4.687651  |
| Si | -2.023920 | 4.083805  | 5.240711  |
| O  | -1.961354 | 5.510080  | 6.048022  |
| Si | -1.279952 | 6.511806  | 7.211456  |
| O  | -1.597810 | 5.786987  | 8.706039  |
| Si | -1.218379 | 4.224608  | 9.064952  |
| O  | -0.680173 | 4.084780  | 10.608062 |
| Si | 0.150864  | 5.086323  | 11.682596 |
| O  | -2.651199 | 2.851337  | 6.155342  |
| Si | -2.582985 | 2.084991  | 7.612860  |
| O  | -2.490898 | 3.179400  | 8.863777  |
| O  | -2.969036 | 4.238787  | 3.892986  |
| O  | -3.992240 | 1.239508  | 7.726594  |
| O  | -1.309258 | 1.015837  | 7.709702  |
| O  | 0.540467  | -0.845142 | 7.276742  |
| Si | 1.792665  | -1.742038 | 7.962233  |
| O  | 2.045031  | 3.625313  | 6.443314  |
| N  | 4.346761  | 2.621877  | 4.945045  |
| O  | -0.104808 | 3.731757  | 7.922665  |
| O  | -2.175097 | 7.904019  | 7.190041  |
| Si | -3.628230 | 8.306103  | 6.451330  |
| O  | 0.298257  | 6.804863  | 7.009331  |
| B  | 6.239950  | 6.506725  | 10.154123 |
| H  | 0.075945  | 1.044467  | 0.530979  |
| H  | -3.912405 | 4.290086  | 4.073642  |
| H  | -4.041678 | 9.626961  | 7.009120  |
| H  | 1.844349  | -1.528168 | 9.437279  |
| H  | 5.568775  | 5.877733  | 4.058149  |
| H  | -4.028273 | 0.623865  | 8.464522  |
| H  | -0.815913 | 5.572052  | 12.710808 |
| H  | -4.686844 | 7.291865  | 6.741160  |
| H  | -3.456272 | 8.426319  | 4.972137  |
| H  | -2.200772 | 1.566342  | 1.235840  |
| H  | 3.979636  | 5.130462  | 2.354470  |
| H  | 3.617320  | 7.267619  | 3.496474  |
| H  | -0.502473 | 3.329820  | 1.162605  |
| H  | 1.218891  | 4.277954  | 12.330557 |
| H  | 0.743641  | 6.260998  | 10.977984 |
| H  | 1.497141  | -3.171042 | 7.661321  |
| H  | 3.102639  | -1.360456 | 7.353567  |
| H  | 5.122991  | 2.878445  | 5.536474  |
| H  | 4.339329  | 1.639865  | 4.712009  |
| H  | 4.878972  | 10.335609 | 8.185509  |
| H  | 4.901906  | 9.852489  | 6.500230  |
| H  | 2.940650  | 11.138942 | 6.596074  |
| H  | 2.276809  | 9.533838  | 6.789005  |
| H  | 1.347995  | 11.265683 | 8.388623  |
| H  | 2.955228  | 11.482170 | 9.059594  |
| H  | 1.663420  | 10.077007 | 10.555537 |
| H  | 1.167916  | 9.005974  | 9.255976  |
| H  | 2.940121  | 8.056503  | 10.761171 |
| H  | 4.079395  | 9.273771  | 10.180047 |
| H  | 5.449328  | 8.056873  | 8.226300  |
| H  | 5.387971  | 6.144995  | 10.907814 |
| H  | 6.502928  | 5.853835  | 9.187752  |
| H  | 6.854492  | 7.507664  | 10.378881 |

|    |           |           |           |
|----|-----------|-----------|-----------|
| C  | 2.358458  | 9.244654  | 9.205872  |
| C  | 1.814708  | 9.837487  | 7.914487  |
| C  | 2.749467  | 10.717298 | 7.074596  |
| C  | 3.877659  | 10.039614 | 6.282005  |
| C  | 5.096649  | 9.613216  | 7.109072  |
| C  | 5.149226  | 8.186299  | 7.545158  |
| O  | 3.292804  | 8.195122  | 8.962538  |
| La | 2.766450  | 5.894592  | 7.951090  |
| O  | 4.710391  | 7.239007  | 6.880539  |
| Si | 2.900348  | 3.565082  | 5.206856  |
| O  | 3.442220  | 5.160684  | 5.176830  |
| Si | 4.410511  | 5.891845  | 3.970134  |
| O  | 1.857686  | 3.105635  | 4.011076  |
| Si | 0.298055  | 2.578002  | 4.336594  |
| O  | 0.374528  | 1.333069  | 5.418393  |
| Si | 0.366262  | 0.667390  | 6.933280  |
| O  | 1.612228  | 1.334238  | 7.846682  |
| Si | 1.677886  | 2.976663  | 8.113204  |
| O  | 2.702628  | 3.763165  | 9.058832  |
| O  | -0.335386 | 1.979154  | 2.950999  |
| Si | -0.933684 | 2.624188  | 1.509706  |
| O  | -0.519874 | 3.893028  | 4.897840  |
| Si | -1.950781 | 4.222425  | 5.659936  |
| O  | -1.767248 | 5.493972  | 6.681001  |
| Si | -0.987299 | 6.261351  | 7.951297  |
| O  | -1.361051 | 5.378596  | 9.340114  |
| Si | -1.022192 | 3.771260  | 9.512398  |
| O  | -0.533161 | 3.427131  | 11.035500 |
| Si | -0.041301 | 4.327425  | 12.380805 |
| O  | -2.520101 | 2.860709  | 6.413035  |
| Si | -2.404005 | 1.888027  | 7.739017  |
| O  | -2.306816 | 2.787212  | 9.135080  |
| O  | -3.017695 | 4.615693  | 4.459584  |
| O  | -3.798594 | 1.009642  | 7.753298  |
| O  | -1.113258 | 0.838701  | 7.639444  |
| O  | 0.682257  | -0.938067 | 6.804731  |
| Si | 1.981893  | -1.915976 | 7.245375  |
| O  | 2.022277  | 3.708880  | 6.609380  |
| N  | 4.259062  | 2.534538  | 5.127660  |
| O  | 0.089785  | 3.409870  | 8.334455  |
| O  | -1.739180 | 7.727351  | 8.127489  |
| Si | -3.270417 | 8.268474  | 7.699009  |
| O  | 0.609378  | 6.455086  | 7.741136  |
| B  | 3.626968  | 7.325974  | 10.163757 |
| H  | -0.206738 | 1.959101  | 0.389303  |
| H  | -3.939975 | 4.604445  | 4.732511  |
| H  | -3.515158 | 9.522357  | 8.470797  |
| H  | 2.155593  | -1.926127 | 8.726451  |
| H  | 5.838628  | 5.866693  | 4.390911  |
| H  | -3.808070 | 0.290899  | 8.392179  |
| H  | -1.249354 | 4.771365  | 13.137180 |
| H  | -4.323418 | 7.263397  | 8.035425  |
| H  | -3.329272 | 8.572173  | 6.237276  |
| H  | -2.388552 | 2.317344  | 1.419658  |
| H  | 4.235007  | 5.133960  | 2.699082  |
| H  | 3.930719  | 7.290007  | 3.805433  |
| H  | -0.708268 | 4.097388  | 1.455618  |
| H  | 0.772770  | 3.409344  | 13.225534 |
| H  | 0.764138  | 5.507625  | 11.963778 |
| H  | 1.660554  | -3.286376 | 6.756791  |
| H  | 3.240512  | -1.436248 | 6.597502  |
| H  | 5.007985  | 2.610040  | 5.800265  |
| H  | 4.119494  | 1.584071  | 4.816230  |



|   |          |           |           |
|---|----------|-----------|-----------|
| H | 5.233107 | 10.245054 | 7.993545  |
| H | 6.020594 | 9.737046  | 6.518842  |
| H | 4.217713 | 10.747813 | 5.518570  |
| H | 3.491760 | 9.171826  | 5.734042  |
| H | 2.122102 | 11.245750 | 6.346007  |
| H | 3.181955 | 11.501522 | 7.712751  |
| H | 0.954216 | 10.454436 | 8.203780  |
| H | 1.393894 | 9.026950  | 7.305328  |
| H | 1.523797 | 8.839462  | 9.794408  |
| H | 2.849383 | 10.014334 | 9.819300  |
| H | 5.748630 | 7.975801  | 8.445339  |
| H | 2.617753 | 6.644247  | 10.421613 |
| H | 4.507025 | 6.548364  | 9.757784  |
| H | 4.001239 | 7.936101  | 11.133947 |

B<sub>BH3</sub>

73

|    |           |           |          |
|----|-----------|-----------|----------|
| C  | 3.816023  | 2.939502  | 5.273555 |
| C  | 2.476204  | 3.278136  | 5.915560 |
| C  | 2.239514  | 2.655834  | 7.293296 |
| C  | 3.361980  | 2.865457  | 8.317492 |
| C  | 4.651210  | 2.115216  | 7.969248 |
| C  | 5.624583  | 2.857830  | 7.050157 |
| O  | 6.329970  | 3.832743  | 7.666769 |
| La | 6.021837  | 5.786833  | 6.504740 |
| O  | 4.898102  | 3.578283  | 5.953440 |
| O  | 7.296853  | 8.270083  | 6.050292 |
| Si | 7.113671  | 7.729181  | 4.435455 |
| O  | 7.919723  | 8.832243  | 3.500271 |
| Si | 8.398100  | 10.389491 | 3.862901 |
| O  | 9.492599  | 10.801946 | 2.714963 |
| Si | 10.916073 | 11.708231 | 2.713957 |
| Si | 8.676671  | 7.934629  | 6.943087 |
| N  | 10.064280 | 7.317654  | 6.158447 |
| O  | 9.048687  | 9.329227  | 7.750717 |
| Si | 8.843118  | 10.791661 | 6.961457 |
| O  | 9.994965  | 11.828137 | 7.491888 |
| Si | 9.962426  | 13.220666 | 8.452204 |
| O  | 8.075939  | 6.691620  | 7.929785 |
| Si | 8.992949  | 5.843166  | 9.124658 |
| O  | 5.449001  | 7.815591  | 4.232755 |
| Si | 4.183694  | 8.888181  | 4.115266 |
| O  | 4.720183  | 10.321577 | 3.483225 |
| Si | 5.510695  | 11.633564 | 4.120512 |
| O  | 5.191435  | 11.793448 | 5.722018 |
| Si | 5.712528  | 11.323327 | 7.223740 |
| O  | 5.193096  | 12.401315 | 8.357629 |
| O  | 7.447781  | 6.165931  | 4.552600 |
| O  | 3.098000  | 8.227425  | 3.073338 |
| Si | 1.441286  | 8.434318  | 2.832547 |
| O  | 3.492404  | 9.117900  | 5.591532 |
| Si | 3.967694  | 8.740488  | 7.159552 |
| O  | 2.669626  | 9.145627  | 8.116132 |
| Si | 1.754388  | 8.186291  | 9.150364 |
| O  | 5.197514  | 9.801742  | 7.576232 |
| O  | 4.417437  | 7.195933  | 7.315442 |
| O  | 9.133008  | 10.474352 | 5.351546 |
| O  | 7.365416  | 11.439416 | 7.255357 |
| O  | 7.133880  | 11.444014 | 3.825711 |
| O  | 4.989408  | 13.020353 | 3.404381 |
| H  | 4.312077  | 12.208914 | 8.693730 |
| H  | 0.718455  | 9.079929  | 9.746588 |
| H  | 11.386767 | 13.613764 | 8.647189 |

|   |           |           |           |
|---|-----------|-----------|-----------|
| H | 1.080637  | 7.077799  | 8.408333  |
| H | 10.715975 | 13.003210 | 3.427281  |
| H | 9.648435  | 4.669848  | 8.489721  |
| H | 5.123865  | 13.055171 | 2.452761  |
| H | 1.044231  | 9.854867  | 3.056888  |
| H | 2.596468  | 7.609451  | 10.240971 |
| H | 9.221664  | 14.309081 | 7.753058  |
| H | 10.001681 | 6.787137  | 9.678664  |
| H | 8.016329  | 5.427584  | 10.164111 |
| H | 9.326344  | 12.928636 | 9.768808  |
| H | 1.161367  | 8.040271  | 1.422432  |
| H | 0.683894  | 7.545389  | 3.762166  |
| H | 12.010634 | 10.934640 | 3.370484  |
| H | 11.255249 | 11.955906 | 1.284727  |
| H | 9.914192  | 6.558764  | 5.503806  |
| H | 10.739005 | 7.985329  | 5.811434  |
| H | 4.400130  | 1.137777  | 7.535634  |
| H | 5.234367  | 1.907897  | 8.872798  |
| H | 3.003087  | 2.511913  | 9.290896  |
| H | 3.571982  | 3.935126  | 8.448437  |
| H | 1.302005  | 3.058280  | 7.695664  |
| H | 2.078655  | 1.574549  | 7.175496  |
| H | 1.678614  | 2.961260  | 5.230656  |
| H | 2.404537  | 4.372085  | 5.981836  |
| H | 3.845878  | 3.299567  | 4.239325  |
| H | 3.995473  | 1.856761  | 5.246253  |
| H | 6.271423  | 2.129185  | 6.527090  |

TS<sub>BBH3→Bro-BH3</sub>

73

|    |           |           |          |
|----|-----------|-----------|----------|
| C  | 3.483466  | 3.374798  | 5.187723 |
| C  | 2.351048  | 3.463075  | 6.217487 |
| C  | 2.439480  | 2.553591  | 7.449707 |
| C  | 3.698791  | 2.674611  | 8.323218 |
| C  | 4.914275  | 1.930649  | 7.754856 |
| C  | 6.157557  | 2.707057  | 7.513236 |
| O  | 6.412979  | 3.829806  | 7.948568 |
| La | 5.831508  | 5.747611  | 6.311506 |
| O  | 4.648101  | 4.026681  | 5.596844 |
| O  | 7.238025  | 8.309290  | 6.014749 |
| Si | 7.096262  | 7.756352  | 4.408443 |
| O  | 7.899426  | 8.860757  | 3.473234 |
| Si | 8.418450  | 10.400165 | 3.857912 |
| O  | 9.535646  | 10.793873 | 2.724350 |
| Si | 10.985216 | 11.656178 | 2.749600 |
| Si | 8.581018  | 7.903851  | 6.929841 |
| N  | 9.966579  | 7.262940  | 6.152548 |
| O  | 8.992546  | 9.286250  | 7.746860 |
| Si | 8.827008  | 10.754391 | 6.963264 |
| O  | 9.987601  | 11.767624 | 7.522801 |
| Si | 9.959643  | 13.159264 | 8.482251 |
| O  | 7.950737  | 6.676608  | 7.907140 |
| Si | 8.845091  | 5.871028  | 9.130720 |
| O  | 5.424348  | 7.810318  | 4.197543 |
| Si | 4.189648  | 8.921819  | 4.053634 |
| O  | 4.793609  | 10.331076 | 3.429863 |
| Si | 5.551139  | 11.655907 | 4.080440 |
| O  | 5.204729  | 11.815319 | 5.676258 |
| Si | 5.703290  | 11.344385 | 7.185625 |
| O  | 5.193375  | 12.439774 | 8.308159 |
| O  | 7.437754  | 6.194940  | 4.523675 |
| O  | 3.096807  | 8.305597  | 2.993451 |
| Si | 1.411920  | 8.348040  | 2.917480 |

|    |           |           |           |
|----|-----------|-----------|-----------|
| O  | 3.481222  | 9.179388  | 5.517584  |
| Si | 3.929544  | 8.781905  | 7.089090  |
| O  | 2.615421  | 9.173016  | 8.031393  |
| Si | 1.692896  | 8.196193  | 9.040538  |
| O  | 5.147268  | 9.839009  | 7.545192  |
| O  | 4.364546  | 7.232024  | 7.224369  |
| O  | 9.141480  | 10.455581 | 5.353444  |
| O  | 7.356842  | 11.430625 | 7.235482  |
| O  | 7.181901  | 11.487995 | 3.814349  |
| O  | 5.021820  | 13.034850 | 3.354297  |
| H  | 4.304167  | 12.266931 | 8.632959  |
| H  | 0.652401  | 9.077996  | 9.646787  |
| H  | 11.386362 | 13.529612 | 8.705053  |
| H  | 1.023861  | 7.099484  | 8.276998  |
| H  | 11.347107 | 11.911690 | 1.327101  |
| H  | 9.487857  | 4.656244  | 8.556677  |
| H  | 5.144916  | 13.057109 | 2.400739  |
| H  | 0.905679  | 9.728787  | 3.169718  |
| H  | 2.525514  | 7.599126  | 10.128459 |
| H  | 9.251026  | 14.261955 | 7.771928  |
| H  | 9.874848  | 6.802926  | 9.666578  |
| H  | 7.868881  | 5.497418  | 10.189359 |
| H  | 9.295245  | 12.878994 | 9.787617  |
| H  | 1.041608  | 7.911817  | 1.541179  |
| H  | 0.829669  | 7.406771  | 3.918548  |
| H  | 10.818603 | 12.948062 | 3.477067  |
| H  | 12.049967 | 10.841899 | 3.406207  |
| H  | 9.789924  | 6.535802  | 5.468247  |
| H  | 10.655034 | 7.925764  | 5.822759  |
| H  | 4.687929  | 1.433733  | 6.802319  |
| H  | 5.232437  | 1.102116  | 8.411117  |
| H  | 3.475792  | 2.272698  | 9.317335  |
| H  | 3.949105  | 3.729336  | 8.480314  |
| H  | 1.568035  | 2.766250  | 8.081118  |
| H  | 2.327011  | 1.505065  | 7.137153  |
| H  | 1.405456  | 3.233363  | 5.707307  |
| H  | 2.277336  | 4.510909  | 6.538572  |
| H  | 3.124229  | 3.814044  | 4.243006  |
| H  | 3.690844  | 2.312675  | 4.959483  |
| H  | 6.934198  | 2.174911  | 6.930626  |

B<sub>roBH3</sub>  
73

|    |           |           |          |
|----|-----------|-----------|----------|
| C  | 3.454675  | 3.450589  | 4.949874 |
| C  | 2.296746  | 3.023770  | 5.858452 |
| C  | 2.582448  | 1.965838  | 6.933286 |
| C  | 3.574451  | 2.371388  | 8.035768 |
| C  | 5.051531  | 2.116175  | 7.626125 |
| C  | 5.959319  | 2.905556  | 8.497384 |
| O  | 6.364297  | 4.033697  | 8.224070 |
| La | 5.746491  | 5.795424  | 6.362602 |
| O  | 4.390268  | 4.269364  | 5.580852 |
| O  | 7.239009  | 8.335776  | 6.029341 |
| Si | 7.041685  | 7.763720  | 4.438095 |
| O  | 7.835720  | 8.840467  | 3.462929 |
| Si | 8.399243  | 10.371495 | 3.816544 |
| O  | 9.488034  | 10.730279 | 2.643870 |
| Si | 10.948991 | 11.572469 | 2.612940 |
| Si | 8.588010  | 7.906693  | 6.923898 |
| N  | 9.934200  | 7.213160  | 6.122151 |
| O  | 9.060016  | 9.293335  | 7.702265 |
| Si | 8.907821  | 10.752397 | 6.900858 |
| O  | 10.106631 | 11.746018 | 7.414738 |

|    |           |           |           |
|----|-----------|-----------|-----------|
| Si | 10.134263 | 13.156533 | 8.345339  |
| O  | 7.943518  | 6.724541  | 7.942067  |
| Si | 8.778133  | 6.011407  | 9.255773  |
| O  | 5.364505  | 7.848771  | 4.277150  |
| Si | 4.149635  | 8.985094  | 4.160505  |
| O  | 4.764807  | 10.373074 | 3.500749  |
| Si | 5.566970  | 11.690900 | 4.109835  |
| O  | 5.268266  | 11.881409 | 5.711880  |
| Si | 5.806782  | 11.419280 | 7.210398  |
| O  | 5.358103  | 12.541460 | 8.333140  |
| O  | 7.352414  | 6.196277  | 4.559496  |
| O  | 3.008602  | 8.386611  | 3.141428  |
| Si | 1.322127  | 8.410302  | 3.158425  |
| O  | 3.495398  | 9.272518  | 5.643645  |
| Si | 3.981651  | 8.889165  | 7.208329  |
| O  | 2.702386  | 9.320293  | 8.182622  |
| Si | 1.762468  | 8.355515  | 9.186483  |
| O  | 5.228918  | 9.933441  | 7.612322  |
| O  | 4.388096  | 7.334486  | 7.359382  |
| O  | 9.171773  | 10.426677 | 5.287110  |
| O  | 7.462754  | 11.469439 | 7.202883  |
| O  | 7.186117  | 11.486373 | 3.801502  |
| O  | 5.045371  | 13.069789 | 3.377460  |
| H  | 4.481216  | 12.384196 | 8.697078  |
| H  | 0.745183  | 9.254950  | 9.806586  |
| H  | 11.574261 | 13.497135 | 8.527307  |
| H  | 1.064194  | 7.279722  | 8.419080  |
| H  | 11.266164 | 11.811741 | 1.176869  |
| H  | 9.314304  | 4.684485  | 8.840363  |
| H  | 5.137692  | 13.072666 | 2.420182  |
| H  | 0.815255  | 9.788246  | 3.424515  |
| H  | 2.585019  | 7.730114  | 10.266680 |
| H  | 9.435651  | 14.262545 | 7.630074  |
| H  | 9.891826  | 6.911324  | 9.664247  |
| H  | 7.800919  | 5.854364  | 10.367201 |
| H  | 9.495344  | 12.919559 | 9.671962  |
| H  | 0.882547  | 7.957757  | 1.807816  |
| H  | 0.803009  | 7.473024  | 4.197238  |
| H  | 10.825553 | 12.872786 | 3.334130  |
| H  | 12.024916 | 10.749239 | 3.239534  |
| H  | 9.714468  | 6.481057  | 5.455577  |
| H  | 10.624909 | 7.853834  | 5.755054  |
| H  | 5.191674  | 2.449168  | 6.595325  |
| H  | 5.276962  | 1.048372  | 7.723197  |
| H  | 3.363424  | 1.814996  | 8.956340  |
| H  | 3.431709  | 3.433113  | 8.267170  |
| H  | 1.629732  | 1.719676  | 7.418584  |
| H  | 2.924463  | 1.034960  | 6.459451  |
| H  | 1.498673  | 2.628738  | 5.214772  |
| H  | 1.889973  | 3.926187  | 6.334292  |
| H  | 3.026935  | 3.976059  | 4.081663  |
| H  | 3.943698  | 2.544723  | 4.545161  |
| H  | 6.258798  | 2.473392  | 9.470296  |

TS<sub>B→Csurf</sub>

77

|   |          |           |           |
|---|----------|-----------|-----------|
| C | 3.153071 | 8.781976  | 9.960671  |
| C | 2.828037 | 10.230888 | 10.284919 |
| C | 3.555459 | 11.268578 | 9.422542  |
| C | 3.087326 | 11.279915 | 7.959751  |
| C | 3.687746 | 10.214664 | 7.029601  |
| C | 3.994168 | 8.841968  | 7.628032  |
| O | 4.045979 | 7.860405  | 6.698768  |

|    |           |           |           |
|----|-----------|-----------|-----------|
| La | 2.398170  | 6.305705  | 7.243238  |
| O  | 2.218295  | 3.803751  | 6.512197  |
| Si | 3.076805  | 3.625727  | 5.101271  |
| O  | 2.142838  | 2.772896  | 4.042416  |
| Si | 0.647596  | 2.133193  | 4.457413  |
| O  | 0.129026  | 1.196098  | 3.219622  |
| Si | -0.343582 | 1.452666  | 1.618127  |
| O  | 2.920829  | 8.440591  | 8.592620  |
| O  | 0.195174  | 6.691670  | 6.886390  |
| Si | -1.352989 | 6.290645  | 7.117565  |
| O  | -1.616994 | 5.643825  | 8.660354  |
| Si | -1.090817 | 4.152851  | 9.119478  |
| O  | -0.575206 | 4.164250  | 10.677193 |
| Si | -0.002618 | 5.343117  | 11.738227 |
| O  | 3.244893  | 5.286147  | 4.815973  |
| Si | 4.116776  | 6.057896  | 3.549920  |
| Si | 1.719284  | 3.401371  | 8.098857  |
| O  | 1.827950  | 1.749037  | 8.230781  |
| Si | 0.755306  | 0.776090  | 7.381496  |
| O  | 0.829245  | 1.152460  | 5.770778  |
| O  | 2.482601  | 4.524532  | 8.945814  |
| O  | -2.363374 | 7.597468  | 7.006483  |
| Si | -3.841211 | 7.825129  | 6.244723  |
| O  | -1.961471 | 5.155047  | 6.036930  |
| Si | -1.857962 | 3.696237  | 5.295009  |
| O  | -2.315562 | 2.438604  | 6.276042  |
| Si | -2.185067 | 1.796191  | 7.787662  |
| O  | -3.493495 | 0.809496  | 7.972631  |
| O  | 0.074364  | 3.691347  | 8.021998  |
| O  | -2.245186 | 2.966848  | 8.970677  |
| O  | -0.797573 | 0.885144  | 7.942447  |
| O  | 1.281083  | -0.762795 | 7.591428  |
| Si | 0.503390  | -2.220302 | 7.936629  |
| N  | 4.625736  | 2.917470  | 5.096209  |
| O  | -0.322284 | 3.436182  | 4.735355  |
| O  | -2.829698 | 3.671760  | 3.957595  |
| B  | 5.403842  | 5.511646  | 8.357516  |
| H  | 0.614421  | 0.718730  | 0.740273  |
| H  | -3.772055 | 3.677919  | 4.149959  |
| H  | -4.369011 | 9.139760  | 6.713689  |
| H  | -0.032028 | -2.202019 | 9.329443  |
| H  | 5.533929  | 6.232694  | 3.967409  |
| H  | -3.696099 | 0.596973  | 8.888491  |
| H  | -1.120773 | 5.771153  | 12.629043 |
| H  | -4.811953 | 6.746169  | 6.602025  |
| H  | -3.675551 | 7.861042  | 4.760205  |
| H  | -1.714209 | 0.896252  | 1.444666  |
| H  | 4.029036  | 5.199682  | 2.335250  |
| H  | 3.450369  | 7.366603  | 3.325351  |
| H  | -0.323545 | 2.905815  | 1.284818  |
| H  | 1.084559  | 4.728114  | 12.548785 |
| H  | 0.516921  | 6.530659  | 10.998429 |
| H  | -0.606981 | -2.466967 | 6.971443  |
| H  | 1.538982  | -3.284273 | 7.806676  |
| H  | 5.361456  | 3.268864  | 5.690819  |
| H  | 4.697516  | 1.923861  | 4.931516  |
| H  | 4.635271  | 10.570801 | 6.605422  |
| H  | 3.016636  | 10.050825 | 6.178886  |
| H  | 3.299244  | 12.263018 | 7.523227  |
| H  | 1.994670  | 11.183307 | 7.956943  |
| H  | 3.362814  | 12.256921 | 9.856588  |
| H  | 4.643359  | 11.122337 | 9.484375  |
| H  | 3.071048  | 10.386861 | 11.344673 |

|   |          |           |           |
|---|----------|-----------|-----------|
| H | 1.745506 | 10.383249 | 10.186427 |
| H | 2.527096 | 8.109236  | 10.556051 |
| H | 4.204444 | 8.561868  | 10.202383 |
| H | 4.908102 | 8.889901  | 8.251420  |
| H | 4.758156 | 6.266433  | 9.014768  |
| H | 4.963522 | 5.027206  | 7.355928  |
| H | 6.514096 | 5.230162  | 8.688550  |

C<sub>surf</sub>

|    |           |           |           |
|----|-----------|-----------|-----------|
| 77 |           |           |           |
| C  | 4.031730  | 8.807412  | 9.349027  |
| C  | 3.939681  | 10.223051 | 9.893500  |
| C  | 4.224864  | 11.333672 | 8.875090  |
| C  | 3.140415  | 11.468655 | 7.795054  |
| C  | 3.214659  | 10.490849 | 6.610987  |
| C  | 3.738276  | 9.087211  | 6.904321  |
| O  | 3.359722  | 8.172037  | 5.977617  |
| La | 2.222567  | 6.515193  | 7.084789  |
| O  | 2.398179  | 3.928206  | 6.791509  |
| Si | 3.252614  | 3.690039  | 5.370684  |
| O  | 2.346273  | 2.837098  | 4.291844  |
| Si | 0.791916  | 2.235541  | 4.431038  |
| O  | 0.349936  | 1.607179  | 2.989212  |
| Si | -0.013747 | 2.210564  | 1.452541  |
| O  | 3.194509  | 8.595721  | 8.205521  |
| O  | -0.012058 | 6.712236  | 6.898630  |
| Si | -1.491240 | 6.168248  | 7.244548  |
| O  | -1.563524 | 5.453025  | 8.770458  |
| Si | -0.953270 | 4.008469  | 9.269296  |
| O  | -0.644622 | 4.022628  | 10.875808 |
| Si | -0.558187 | 5.208463  | 12.077069 |
| O  | 3.359581  | 5.332968  | 4.997370  |
| Si | 4.285506  | 6.113477  | 3.764008  |
| Si | 1.946143  | 3.128104  | 8.230614  |
| O  | 1.925199  | 1.505724  | 7.935379  |
| Si | 0.808523  | 0.574322  | 7.121088  |
| O  | 0.776449  | 1.002497  | 5.524031  |
| O  | 2.957998  | 3.597788  | 9.388967  |
| O  | -2.627411 | 7.368544  | 7.262789  |
| Si | -4.177417 | 7.498244  | 6.631829  |
| O  | -2.046261 | 5.022720  | 6.145363  |
| Si | -1.763676 | 3.629439  | 5.333705  |
| O  | -2.211747 | 2.317956  | 6.244404  |
| Si | -2.061728 | 1.648209  | 7.743519  |
| O  | -3.387655 | 0.695863  | 7.963426  |
| O  | 0.399020  | 3.706065  | 8.351443  |
| O  | -2.017233 | 2.769746  | 8.963159  |
| O  | -0.686075 | 0.716617  | 7.806727  |
| O  | 1.314347  | -0.977988 | 7.230793  |
| Si | 0.601120  | -2.425949 | 7.727076  |
| N  | 4.793961  | 2.977219  | 5.460000  |
| O  | -0.160341 | 3.501909  | 4.913021  |
| O  | -2.604007 | 3.590658  | 3.912577  |
| B  | 3.300922  | 5.046950  | 9.484288  |
| H  | 1.036423  | 1.718426  | 0.513681  |
| H  | -3.559700 | 3.538847  | 4.008453  |
| H  | -4.739484 | 8.785880  | 7.132574  |
| H  | 0.261017  | -2.361852 | 9.178291  |
| H  | 5.551847  | 6.615921  | 4.356715  |
| H  | -3.621416 | 0.559777  | 8.886455  |
| H  | -1.936292 | 5.533257  | 12.549009 |
| H  | -5.044445 | 6.368023  | 7.085029  |
| H  | -4.143516 | 7.518256  | 5.138198  |

|   |           |           |           |
|---|-----------|-----------|-----------|
| H | -1.343818 | 1.677642  | 1.049177  |
| H | 4.574690  | 5.077778  | 2.730498  |
| H | 3.443566  | 7.194533  | 3.198444  |
| H | -0.023538 | 3.701471  | 1.463016  |
| H | 0.236368  | 4.623326  | 13.192206 |
| H | 0.101993  | 6.440698  | 11.560060 |
| H | -0.629276 | -2.698972 | 6.929409  |
| H | 1.615308  | -3.490543 | 7.486987  |
| H | 5.436634  | 3.255644  | 6.187810  |
| H | 4.879440  | 1.999296  | 5.223087  |
| H | 3.864707  | 10.893470 | 5.823862  |
| H | 2.222405  | 10.377930 | 6.159915  |
| H | 3.162091  | 12.487471 | 7.390968  |
| H | 2.164371  | 11.364796 | 8.284695  |
| H | 4.286180  | 12.280775 | 9.424273  |
| H | 5.214489  | 11.189522 | 8.418927  |
| H | 4.645408  | 10.293202 | 10.732011 |
| H | 2.938219  | 10.378207 | 10.315442 |
| H | 3.714156  | 8.078295  | 10.100217 |
| H | 5.068643  | 8.567594  | 9.070040  |
| H | 4.834181  | 9.108423  | 7.054513  |
| H | 2.255865  | 5.761522  | 9.447101  |
| H | 4.007182  | 5.408743  | 8.504317  |
| H | 3.890682  | 5.318552  | 10.501613 |

TS<sub>Csurf→Csurf\_ro</sub>

77

|    |           |           |           |
|----|-----------|-----------|-----------|
| H  | -3.834222 | 0.873571  | 8.520355  |
| O  | -3.498924 | 1.000266  | 7.627750  |
| O  | 1.070156  | -0.997789 | 7.054082  |
| O  | -0.798064 | 0.832755  | 7.653370  |
| Si | -2.097818 | 1.865803  | 7.564482  |
| Si | 0.703775  | 0.597696  | 7.008350  |
| O  | 0.759987  | 1.098895  | 5.431876  |
| O  | -2.089127 | 2.639516  | 6.107440  |
| Si | -1.486060 | 3.955037  | 5.299117  |
| Si | 0.981000  | 2.381790  | 4.421917  |
| O  | 2.590883  | 2.839079  | 4.436291  |
| O  | 0.107377  | 3.703498  | 4.900492  |
| O  | -1.652038 | 5.316908  | 6.191431  |
| H  | 4.808368  | 1.575692  | 5.679843  |
| Si | 3.481729  | 3.511131  | 5.651095  |
| N  | 4.869047  | 2.558872  | 5.904528  |
| Si | -1.071316 | 6.324975  | 7.405007  |
| O  | 2.507105  | 3.861643  | 6.963167  |
| O  | -1.341448 | 5.530848  | 8.865577  |
| Si | 1.971304  | 2.983154  | 8.327592  |
| Si | -0.916416 | 4.004286  | 9.313921  |
| O  | -2.076563 | 2.902673  | 8.858319  |
| O  | 1.871893  | 1.390672  | 7.891251  |
| O  | 2.997473  | 3.287267  | 9.528911  |
| O  | -0.728744 | 3.902630  | 10.935623 |
| O  | -2.286397 | 4.089259  | 3.859648  |
| O  | 0.608613  | 1.877075  | 2.912556  |
| Si | -3.668556 | 7.869406  | 6.947926  |
| O  | -2.072424 | 7.643350  | 7.414806  |
| H  | 5.436759  | 2.725310  | 6.724148  |
| B  | 3.413435  | 4.714108  | 9.688217  |
| La | 2.695836  | 6.474043  | 7.341122  |
| O  | 3.901844  | 5.116513  | 5.319552  |
| Si | 4.842054  | 5.689078  | 3.995028  |
| O  | 0.444878  | 3.592454  | 8.464740  |
| Si | 0.215802  | -2.389572 | 7.482928  |

|    |           |           |           |
|----|-----------|-----------|-----------|
| O  | 0.472972  | 6.742604  | 7.201491  |
| Si | 0.297777  | 2.596398  | 1.416114  |
| Si | -0.515478 | 5.020241  | 12.187180 |
| O  | 3.491700  | 8.320380  | 8.326613  |
| C  | 3.615625  | 9.197790  | 6.163276  |
| O  | 3.444839  | 8.128923  | 5.545513  |
| C  | 4.287172  | 9.104456  | 9.167400  |
| C  | 3.602519  | 10.398155 | 9.594350  |
| C  | 3.245556  | 11.362888 | 8.457085  |
| C  | 2.139723  | 10.869875 | 7.502651  |
| C  | 2.595077  | 10.293165 | 6.150668  |
| H  | 1.308194  | 2.073608  | 0.450510  |
| H  | -3.245596 | 4.076454  | 3.930145  |
| H  | -4.127226 | 9.145628  | 7.570123  |
| H  | -0.164767 | -2.339257 | 8.924599  |
| H  | 5.983426  | 6.460739  | 4.556697  |
| H  | -1.849723 | 5.533987  | 12.616433 |
| H  | -4.539363 | 6.747078  | 7.412017  |
| H  | -3.769250 | 7.982715  | 5.461047  |
| H  | -1.069847 | 2.202396  | 0.979149  |
| H  | 5.334640  | 4.502801  | 3.241195  |
| H  | 3.975528  | 6.534418  | 3.135256  |
| H  | 0.412101  | 4.080037  | 1.512279  |
| H  | 0.125637  | 4.279294  | 13.308765 |
| H  | 0.347634  | 6.152445  | 11.748729 |
| H  | -1.007030 | -2.530096 | 6.640537  |
| H  | 1.139402  | -3.533175 | 7.239117  |
| H  | 3.063131  | 11.100682 | 5.563699  |
| H  | 1.729730  | 9.934405  | 5.584503  |
| H  | 1.469913  | 11.702496 | 7.259236  |
| H  | 1.525776  | 10.118904 | 8.008170  |
| H  | 2.911157  | 12.302304 | 8.912595  |
| H  | 4.152901  | 11.624112 | 7.892570  |
| H  | 4.266286  | 10.912534 | 10.302721 |
| H  | 2.689802  | 10.144597 | 10.149451 |
| H  | 4.558640  | 8.529226  | 10.065430 |
| H  | 5.241830  | 9.357959  | 8.665593  |
| H  | 4.618711  | 9.450134  | 6.539419  |
| H  | 2.412509  | 5.475548  | 9.577127  |
| H  | 4.212467  | 5.055970  | 8.767135  |
| H  | 3.937559  | 4.928973  | 10.752340 |

C<sub>Sruf\_ro</sub>  
77

|    |           |           |          |
|----|-----------|-----------|----------|
| H  | -3.883161 | 0.957771  | 8.447880 |
| O  | -3.523951 | 1.083103  | 7.564420 |
| O  | 1.016562  | -0.997589 | 6.992790 |
| O  | -0.829679 | 0.847725  | 7.610840 |
| Si | -2.101674 | 1.915833  | 7.543482 |
| Si | 0.677546  | 0.604813  | 6.981544 |
| O  | 0.764016  | 1.142553  | 5.418508 |
| O  | -2.054903 | 2.736889  | 6.113666 |
| Si | -1.418008 | 4.050988  | 5.329780 |
| Si | 1.018811  | 2.438892  | 4.433592 |
| O  | 2.639146  | 2.857955  | 4.466178 |
| O  | 0.170219  | 3.770198  | 4.929977 |
| O  | -1.555614 | 5.403680  | 6.240164 |
| H  | 4.762939  | 1.472999  | 5.759211 |
| Si | 3.527836  | 3.465900  | 5.717305 |
| N  | 4.867795  | 2.451995  | 5.986380 |
| Si | -0.980663 | 6.358767  | 7.498950 |
| O  | 2.528385  | 3.825526  | 7.006716 |
| O  | -1.306253 | 5.526400  | 8.926658 |



|    |           |           |           |
|----|-----------|-----------|-----------|
| Si | 1.975445  | 2.940257  | 8.358438  |
| Si | -0.900828 | 3.988174  | 9.352671  |
| O  | -2.071594 | 2.908377  | 8.871459  |
| O  | 1.845320  | 1.355391  | 7.900138  |
| O  | 3.005395  | 3.203410  | 9.566238  |
| O  | -0.726910 | 3.855799  | 10.973868 |
| O  | -2.210502 | 4.225715  | 3.889799  |
| O  | 0.645927  | 1.970211  | 2.912616  |
| Si | -3.569983 | 7.946308  | 7.151734  |
| O  | -1.953218 | 7.699300  | 7.526807  |
| H  | 5.424713  | 2.588198  | 6.819071  |
| B  | 3.464155  | 4.614483  | 9.745741  |
| La | 2.798133  | 6.438380  | 7.437274  |
| O  | 4.023444  | 5.057547  | 5.422905  |
| Si | 4.977422  | 5.619976  | 4.106804  |
| O  | 0.460514  | 3.575114  | 8.505254  |
| Si | 0.129159  | -2.384561 | 7.366145  |
| O  | 0.574414  | 6.750601  | 7.343763  |
| Si | 0.327065  | 2.721131  | 1.433779  |
| Si | -0.487121 | 4.950442  | 12.240800 |
| O  | 3.621916  | 8.258821  | 8.365882  |
| C  | 3.541323  | 9.185011  | 5.954443  |
| O  | 3.349731  | 8.062136  | 5.473530  |
| C  | 4.285830  | 9.204108  | 9.148626  |
| C  | 3.431448  | 10.426814 | 9.472772  |
| C  | 3.040555  | 11.309972 | 8.280569  |
| C  | 1.993894  | 10.714461 | 7.313882  |
| C  | 2.513219  | 10.266097 | 5.928781  |
| H  | 1.316350  | 2.198106  | 0.446572  |
| H  | -3.169992 | 4.224913  | 3.957377  |
| H  | -3.995197 | 9.196589  | 7.846667  |
| H  | -0.274313 | -2.369957 | 8.802366  |
| H  | 6.024086  | 6.510910  | 4.677741  |
| H  | -1.807193 | 5.501551  | 12.667657 |
| H  | -4.420673 | 6.806446  | 7.609959  |
| H  | -3.742157 | 8.122225  | 5.677340  |
| H  | -1.052232 | 2.357947  | 1.006700  |
| H  | 5.598809  | 4.437871  | 3.448463  |
| H  | 4.100433  | 6.350357  | 3.155701  |
| H  | 0.467965  | 4.200732  | 1.553289  |
| H  | 0.121718  | 4.175443  | 13.357399 |
| H  | 0.415059  | 6.059602  | 11.822592 |
| H  | -1.081833 | -2.477341 | 6.500310  |
| H  | 1.035175  | -3.538071 | 7.103263  |
| H  | 2.979543  | 11.131673 | 5.434376  |
| H  | 1.677923  | 9.921749  | 5.311755  |
| H  | 1.221707  | 11.462720 | 7.104392  |
| H  | 1.480661  | 9.870566  | 7.783787  |
| H  | 2.638188  | 12.247284 | 8.682046  |
| H  | 3.947479  | 11.601755 | 7.730576  |
| H  | 3.992056  | 11.041357 | 10.190583 |
| H  | 2.523427  | 10.093100 | 9.992051  |
| H  | 4.613651  | 8.743339  | 10.093352 |
| H  | 5.207795  | 9.544746  | 8.638318  |
| H  | 4.538989  | 9.443448  | 6.344671  |
| H  | 2.486619  | 5.408379  | 9.648421  |
| H  | 4.271121  | 4.946017  | 8.828144  |
| H  | 3.995914  | 4.797081  | 10.812004 |

#### 4.2 (X<sub>1</sub>)(X<sub>2</sub>)La@c-2 as catalyst forms

(BH<sub>4</sub>)(CH<sub>3</sub>)La@c-2

|    |           |           |           |
|----|-----------|-----------|-----------|
| B  | -0.364442 | 7.915450  | 7.530435  |
| La | 1.276488  | 6.000750  | 8.403991  |
| C  | 1.633957  | 6.364944  | 10.837964 |
| Si | 3.509033  | 4.102377  | 7.118997  |
| O  | 3.519332  | 3.698984  | 5.509791  |
| Si | 3.638903  | 2.319700  | 4.599158  |
| O  | 4.037653  | 2.723903  | 3.067394  |
| Si | 4.267917  | 4.187079  | 2.247957  |
| O  | 2.195412  | 1.512605  | 4.584907  |
| Si | 0.778452  | 0.987923  | 5.230177  |
| O  | 1.012638  | -0.412123 | 6.074589  |
| Si | 2.215476  | -1.242973 | 6.843964  |
| O  | 1.790563  | -2.825367 | 6.739312  |
| O  | -0.345340 | 0.779085  | 4.068118  |
| Si | -0.911079 | -0.527793 | 3.151136  |
| O  | 0.169702  | 2.139655  | 6.278831  |
| Si | 0.629420  | 2.644775  | 7.770879  |
| O  | 0.745009  | 1.407200  | 8.842439  |
| Si | 2.033475  | 0.514003  | 9.429417  |
| O  | 1.620734  | -0.045924 | 10.905752 |
| Si | 2.106413  | 0.260258  | 12.497835 |
| O  | 4.806827  | 1.328806  | 5.218928  |
| Si | 4.980004  | 0.017983  | 6.214472  |
| O  | 6.266098  | -0.892444 | 5.748123  |
| O  | 5.175317  | 0.548347  | 7.771613  |
| Si | 4.796484  | 1.814684  | 8.761442  |
| O  | 5.972365  | 1.966886  | 9.888253  |
| Si | 6.940817  | 3.248263  | 10.421583 |
| O  | 3.673319  | -0.985176 | 6.110182  |
| O  | 4.681901  | 3.223566  | 7.898118  |
| O  | 3.359612  | 1.497154  | 9.531034  |
| O  | 2.012278  | 3.535039  | 7.754999  |
| O  | 3.396858  | 5.660442  | 7.450830  |
| O  | -0.430115 | 3.833569  | 8.299648  |
| Si | -2.157367 | 3.819985  | 8.383591  |
| O  | 2.319050  | -0.760016 | 8.426609  |
| H  | 2.455959  | -3.450104 | 7.042702  |
| H  | 7.091790  | -0.411513 | 5.639668  |
| H  | 4.557283  | 3.822242  | 0.833406  |
| H  | 3.033131  | 5.019303  | 2.325924  |
| H  | 5.422144  | 4.924271  | 2.837638  |
| H  | -1.597299 | 0.061349  | 1.968585  |
| H  | 0.229747  | -1.384872 | 2.718509  |
| H  | -1.872809 | -1.323041 | 3.966174  |
| H  | 7.741535  | 2.710667  | 11.556529 |
| H  | 7.843663  | 3.696070  | 9.322185  |
| H  | 6.088641  | 4.382334  | 10.879872 |
| H  | 1.211359  | -0.554368 | 13.364703 |
| H  | 3.526861  | -0.152286 | 12.682653 |
| H  | 1.949255  | 1.710706  | 12.808198 |
| H  | -2.504396 | 4.833315  | 9.412891  |
| H  | -2.697992 | 4.177909  | 7.047370  |
| H  | -2.580446 | 2.453411  | 8.794876  |
| H  | -0.111505 | 8.088092  | 8.731455  |
| H  | 0.717315  | 7.884026  | 6.913639  |
| H  | -0.868095 | 6.777457  | 7.419310  |
| H  | 0.696698  | 6.487711  | 11.401318 |
| H  | 2.172802  | 5.516631  | 11.290636 |
| H  | 2.238198  | 7.261516  | 11.044278 |
| H  | -1.090134 | 8.759921  | 7.086218  |

|    |           |           |           |
|----|-----------|-----------|-----------|
| C  | 3.396760  | 5.680184  | 10.105434 |
| La | 1.939835  | 5.427375  | 8.076128  |
| O  | 0.933549  | 7.495264  | 7.388365  |
| Si | 2.055539  | 8.327643  | 6.615744  |
| O  | 2.466108  | 9.806343  | 7.257800  |
| Si | 3.820575  | 10.677631 | 7.629676  |
| O  | 4.199989  | 11.723641 | 6.406781  |
| Si | 4.104384  | 11.823374 | 4.757128  |
| O  | 5.490010  | 11.269897 | 4.052047  |
| Si | 6.689630  | 10.159870 | 4.312022  |
| O  | 6.933651  | 9.984249  | 5.942716  |
| Si | 6.444928  | 9.033017  | 7.206628  |
| O  | 7.638421  | 8.957023  | 8.320979  |
| Si | 9.277021  | 9.365017  | 8.350096  |
| B  | 1.726170  | 3.136551  | 6.624601  |
| O  | 4.740669  | 5.131775  | 6.717924  |
| Si | 5.574028  | 3.691803  | 6.318411  |
| O  | 0.396997  | 4.146184  | 9.955514  |
| C  | -0.695682 | 4.657523  | 9.768803  |
| O  | -0.706000 | 5.651930  | 8.864133  |
| C  | -1.873974 | 6.409965  | 8.453003  |
| C  | -2.472556 | 7.236745  | 9.576150  |
| C  | -3.310138 | 6.452887  | 10.588107 |
| C  | -2.551087 | 5.372447  | 11.358710 |
| C  | -1.954800 | 4.258435  | 10.477779 |
| O  | 3.407093  | 7.296562  | 6.782723  |
| Si | 4.795800  | 6.672128  | 6.135670  |
| O  | 4.739557  | 6.672823  | 4.487501  |
| Si | 5.008396  | 7.761483  | 3.265731  |
| O  | 5.321871  | 6.896910  | 1.915674  |
| Si | 5.116698  | 7.131599  | 0.255563  |
| O  | 6.119790  | 7.495635  | 6.666939  |
| O  | 5.087627  | 9.652367  | 7.909719  |
| O  | 3.539972  | 11.585573 | 8.965246  |
| Si | 2.637508  | 11.368069 | 10.373983 |
| O  | 1.800334  | 8.538584  | 4.983731  |
| Si | 2.371426  | 9.447049  | 3.727087  |
| O  | 1.193863  | 9.593291  | 2.595928  |
| Si | -0.322619 | 8.879697  | 2.394787  |
| O  | 3.684320  | 8.721016  | 3.028418  |
| O  | 2.788920  | 10.960997 | 4.241218  |
| O  | 6.313213  | 8.696736  | 3.653528  |
| O  | 8.068501  | 10.673845 | 3.578378  |
| O  | 3.983039  | 13.395795 | 4.287980  |
| H  | 8.179703  | 11.629146 | 3.568311  |
| H  | 3.195225  | 13.851316 | 4.598793  |
| H  | -0.824580 | 9.337687  | 1.068766  |
| H  | -0.211209 | 7.392453  | 2.416315  |
| H  | -1.252401 | 9.332224  | 3.471462  |
| H  | 3.696763  | 6.867070  | -0.115978 |
| H  | 5.488608  | 8.525935  | -0.123481 |
| H  | 6.014794  | 6.156046  | -0.422389 |
| H  | 3.238027  | 12.256868 | 11.408038 |
| H  | 1.220895  | 11.768972 | 10.126441 |
| H  | 2.687614  | 9.946773  | 10.823256 |
| H  | 9.999293  | 8.694425  | 7.230253  |
| H  | 9.437025  | 10.844368 | 8.241457  |
| H  | 9.801719  | 8.888403  | 9.659848  |
| H  | 5.573601  | 2.853975  | 7.545301  |
| H  | 4.883638  | 3.016871  | 5.189557  |
| H  | 6.969245  | 4.057765  | 5.934310  |
| H  | 4.292751  | 6.293976  | 9.925924  |
| H  | 2.849072  | 6.164503  | 10.931647 |

|   |           |          |           |
|---|-----------|----------|-----------|
| H | 3.749479  | 4.714359 | 10.498650 |
| H | -1.459390 | 7.047854 | 7.671657  |
| H | -2.598909 | 5.714634 | 8.013887  |
| H | -3.105564 | 7.997016 | 9.102412  |
| H | -1.661494 | 7.783526 | 10.073192 |
| H | -3.746252 | 7.155674 | 11.307223 |
| H | -4.157738 | 5.987590 | 10.065239 |
| H | -1.753924 | 5.822891 | 11.963274 |
| H | -3.236808 | 4.894839 | 12.066432 |
| H | -1.690203 | 3.387199 | 11.079692 |
| H | -2.692500 | 3.934614 | 9.731263  |
| H | 0.646348  | 3.455644 | 7.151404  |
| H | 1.615307  | 2.134824 | 5.969323  |
| H | 2.080165  | 4.098177 | 5.922139  |
| H | 2.559421  | 2.991466 | 7.530665  |

TS<sub>A→AB</sub>

|    |           |           |           |
|----|-----------|-----------|-----------|
| 78 |           |           |           |
| C  | 3.240733  | 6.757007  | 11.020133 |
| La | 2.096602  | 6.225024  | 8.857241  |
| O  | 1.203692  | 8.305326  | 8.164281  |
| Si | 2.240334  | 8.935921  | 7.127257  |
| O  | 2.952785  | 10.382251 | 7.529371  |
| Si | 4.467246  | 11.045878 | 7.583046  |
| O  | 4.826736  | 11.822165 | 6.167941  |
| Si | 4.511451  | 11.755298 | 4.545458  |
| O  | 5.682201  | 10.898802 | 3.754993  |
| Si | 6.746396  | 9.667998  | 4.044125  |
| O  | 7.163292  | 9.661063  | 5.649428  |
| Si | 6.757001  | 8.973765  | 7.096996  |
| O  | 8.080508  | 8.859083  | 8.046866  |
| Si | 9.702992  | 9.312778  | 7.914967  |
| B  | 0.761053  | 4.357072  | 6.501833  |
| O  | 4.398714  | 5.423822  | 7.435951  |
| Si | 5.059692  | 3.838073  | 7.321767  |
| O  | 0.930115  | 4.172558  | 9.545528  |
| C  | -0.173560 | 4.337805  | 8.917976  |
| O  | -0.496484 | 5.722500  | 8.928483  |
| C  | -1.675405 | 6.196398  | 8.259835  |
| C  | -2.852093 | 6.232982  | 9.220290  |
| C  | -3.387042 | 4.863183  | 9.643397  |
| C  | -2.346131 | 3.890957  | 10.209964 |
| C  | -1.341609 | 3.381619  | 9.163996  |
| O  | 3.494318  | 7.765002  | 7.150722  |
| Si | 4.684632  | 6.809799  | 6.544255  |
| O  | 4.486244  | 6.491109  | 4.944814  |
| Si | 4.640940  | 7.430616  | 3.577347  |
| O  | 4.596561  | 6.411208  | 2.304008  |
| Si | 4.107362  | 6.509359  | 0.687834  |
| O  | 6.175163  | 7.429122  | 6.853026  |
| O  | 5.593832  | 9.860578  | 7.857088  |
| O  | 4.535833  | 12.153335 | 8.784333  |
| Si | 3.675063  | 12.402184 | 10.218520 |
| O  | 1.720967  | 9.040579  | 5.551064  |
| Si | 2.313968  | 9.589789  | 4.109718  |
| O  | 1.078935  | 9.733808  | 3.043372  |
| Si | -0.591586 | 9.495951  | 3.137638  |
| O  | 3.422208  | 8.534891  | 3.479774  |
| O  | 3.024626  | 11.068764 | 4.307420  |
| O  | 6.099485  | 8.203422  | 3.644296  |
| O  | 8.081849  | 9.876047  | 3.108675  |
| O  | 4.566033  | 13.261969 | 3.889946  |
| H  | 8.269053  | 10.792308 | 2.884307  |

|   |           |           |           |
|---|-----------|-----------|-----------|
| H | 3.929217  | 13.887066 | 4.248525  |
| H | -1.138786 | 9.893193  | 1.810031  |
| H | -0.897155 | 8.063766  | 3.412030  |
| H | -1.176322 | 10.356078 | 4.207045  |
| H | 2.629169  | 6.335869  | 0.604091  |
| H | 4.499913  | 7.827182  | 0.110524  |
| H | 4.798921  | 5.402467  | -0.028922 |
| H | 4.480607  | 13.362702 | 11.025256 |
| H | 2.341171  | 12.992693 | 9.908251  |
| H | 3.507188  | 11.118916 | 10.957703 |
| H | 10.348753 | 8.579789  | 6.787045  |
| H | 9.808926  | 10.784256 | 7.691336  |
| H | 10.343898 | 8.940106  | 9.206270  |
| H | 4.418843  | 3.080716  | 8.428761  |
| H | 4.731219  | 3.260988  | 5.992324  |
| H | 6.533702  | 3.934338  | 7.514713  |
| H | 4.111989  | 7.422723  | 10.909306 |
| H | 2.558140  | 7.262774  | 11.721460 |
| H | 3.599854  | 5.855771  | 11.541065 |
| H | -1.415720 | 7.199784  | 7.911701  |
| H | -1.866739 | 5.569307  | 7.378961  |
| H | -3.659237 | 6.807448  | 8.747876  |
| H | -2.541165 | 6.805596  | 10.104553 |
| H | -4.174912 | 5.015082  | 10.390510 |
| H | -3.874779 | 4.384928  | 8.782173  |
| H | -1.811306 | 4.341779  | 11.055606 |
| H | -2.874465 | 3.017797  | 10.611936 |
| H | -0.873086 | 2.448122  | 9.489640  |
| H | -1.866942 | 3.169189  | 8.226393  |
| H | 0.006492  | 4.122405  | 7.608293  |
| H | 0.304810  | 3.581294  | 5.703141  |
| H | 0.567858  | 5.535124  | 6.295953  |
| H | 1.851842  | 4.063202  | 6.957712  |

**AB :**

|    |           |           |           |
|----|-----------|-----------|-----------|
| 78 |           |           |           |
| C  | 2.598385  | 6.886092  | 11.151983 |
| La | 1.891216  | 6.502760  | 8.777144  |
| O  | 1.098346  | 8.592660  | 7.949735  |
| Si | 2.227676  | 9.132752  | 6.964526  |
| O  | 2.980910  | 10.564202 | 7.352707  |
| Si | 4.521656  | 11.152009 | 7.479129  |
| O  | 4.998385  | 11.874912 | 6.070624  |
| Si | 4.772145  | 11.764628 | 4.435301  |
| O  | 5.950676  | 10.833655 | 3.746799  |
| Si | 6.934529  | 9.560355  | 4.127347  |
| O  | 7.270014  | 9.578593  | 5.751971  |
| Si | 6.733692  | 8.956502  | 7.186486  |
| O  | 7.985117  | 8.803328  | 8.225006  |
| Si | 9.626890  | 9.205901  | 8.200220  |
| B  | -0.199681 | 4.795067  | 5.786566  |
| O  | 4.179885  | 5.527612  | 7.471277  |
| Si | 4.687140  | 3.887186  | 7.296098  |
| O  | 1.110828  | 4.261475  | 8.599145  |
| C  | -0.172078 | 4.362927  | 8.351141  |
| O  | -0.565883 | 5.697281  | 8.759145  |
| C  | -1.944929 | 6.088291  | 8.714604  |
| C  | -2.613108 | 5.842706  | 10.058995 |
| C  | -2.818778 | 4.370058  | 10.422409 |
| C  | -1.572261 | 3.480525  | 10.329966 |
| C  | -1.084107 | 3.255981  | 8.892557  |
| O  | 3.434672  | 7.916655  | 7.143666  |
| Si | 4.586193  | 6.884092  | 6.581401  |

|    |           |           |           |
|----|-----------|-----------|-----------|
| O  | 4.432399  | 6.554223  | 4.979836  |
| Si | 4.744578  | 7.420294  | 3.589255  |
| O  | 4.741131  | 6.346451  | 2.361212  |
| Si | 4.333499  | 6.383651  | 0.720085  |
| O  | 6.091053  | 7.433864  | 6.948187  |
| O  | 5.569277  | 9.920507  | 7.844325  |
| O  | 4.579660  | 12.283657 | 8.660166  |
| Si | 3.619048  | 12.641296 | 10.004620 |
| O  | 1.840431  | 9.174512  | 5.348290  |
| Si | 2.507356  | 9.685420  | 3.925487  |
| O  | 1.324032  | 9.865378  | 2.810173  |
| Si | -0.357597 | 9.684419  | 2.842325  |
| O  | 3.598442  | 8.579328  | 3.352531  |
| O  | 3.271887  | 11.135662 | 4.136910  |
| O  | 6.233543  | 8.117273  | 3.739771  |
| O  | 8.325421  | 9.674846  | 3.259146  |
| O  | 4.930636  | 13.242461 | 3.731320  |
| H  | 8.561960  | 10.572810 | 3.008390  |
| H  | 4.272055  | 13.891927 | 3.994592  |
| H  | -0.836742 | 10.088115 | 1.490390  |
| H  | -0.718828 | 8.264484  | 3.114686  |
| H  | -0.951445 | 10.574585 | 3.881566  |
| H  | 2.854031  | 6.277939  | 0.571379  |
| H  | 4.821554  | 7.647727  | 0.096298  |
| H  | 5.000762  | 5.207592  | 0.096514  |
| H  | 4.416196  | 13.577223 | 10.846175 |
| H  | 2.357551  | 13.302472 | 9.561462  |
| H  | 3.304912  | 11.399741 | 10.767897 |
| H  | 10.330954 | 8.414502  | 7.150450  |
| H  | 9.794872  | 10.664522 | 7.936764  |
| H  | 10.157361 | 8.861478  | 9.548286  |
| H  | 4.531218  | 3.278967  | 8.642581  |
| H  | 3.828683  | 3.223459  | 6.282823  |
| H  | 6.114722  | 3.898639  | 6.870909  |
| H  | 3.587544  | 7.367543  | 11.223721 |
| H  | 1.901178  | 7.548723  | 11.689652 |
| H  | 2.661797  | 5.957690  | 11.740801 |
| H  | -1.943160 | 7.153416  | 8.467119  |
| H  | -2.442446 | 5.557757  | 7.893739  |
| H  | -3.584222 | 6.354728  | 10.055757 |
| H  | -2.005677 | 6.337899  | 10.827613 |
| H  | -3.220077 | 4.320028  | 11.441942 |
| H  | -3.595399 | 3.944347  | 9.770850  |
| H  | -0.757889 | 3.886197  | 10.943005 |
| H  | -1.819005 | 2.502707  | 10.759676 |
| H  | -0.485767 | 2.343206  | 8.818972  |
| H  | -1.947901 | 3.122670  | 8.229991  |
| H  | -0.399048 | 4.349404  | 7.175095  |
| H  | 0.178312  | 3.734378  | 5.371722  |
| H  | -1.324543 | 5.152398  | 5.559559  |
| H  | 0.627240  | 5.643370  | 6.018984  |

TS<sub>AB→B</sub>

|    |          |          |           |
|----|----------|----------|-----------|
| 78 |          |          |           |
| C  | 2.618036 | 6.998178 | 11.037486 |
| La | 1.880660 | 6.454269 | 8.703477  |
| O  | 1.152991 | 8.498044 | 7.722673  |
| Si | 2.305410 | 8.943292 | 6.716870  |
| O  | 1.933478 | 8.905211 | 5.097374  |
| Si | 2.654067 | 9.295855 | 3.661957  |
| O  | 3.737276 | 8.127731 | 3.214945  |
| Si | 4.838543 | 6.944544 | 3.502325  |
| O  | 4.482338 | 6.164680 | 4.933723  |

|    |           |           |           |
|----|-----------|-----------|-----------|
| Si | 4.601998  | 6.599129  | 6.513637  |
| O  | 6.114975  | 7.127364  | 6.880350  |
| Si | 6.800937  | 8.643011  | 7.035608  |
| O  | 5.657726  | 9.682732  | 7.604205  |
| Si | 4.654674  | 10.921200 | 7.145785  |
| O  | 4.731398  | 12.122407 | 8.254367  |
| Si | 3.789454  | 12.568719 | 9.585506  |
| O  | -0.598032 | 5.699626  | 8.792472  |
| C  | -0.226163 | 4.326699  | 8.493321  |
| O  | 1.057685  | 4.217694  | 8.754552  |
| O  | 3.472203  | 7.701211  | 6.977007  |
| O  | 4.135013  | 5.317193  | 7.481345  |
| Si | 4.589197  | 3.653244  | 7.424038  |
| C  | -1.966790 | 6.115673  | 8.760071  |
| C  | -2.599049 | 5.987595  | 10.137450 |
| C  | -2.830726 | 4.552328  | 10.616340 |
| C  | -1.610938 | 3.625794  | 10.557950 |
| C  | -1.167208 | 3.288364  | 9.126729  |
| O  | 3.099603  | 10.370957 | 7.031321  |
| O  | 8.025225  | 8.534417  | 8.111729  |
| Si | 9.712947  | 8.535749  | 8.015658  |
| O  | 7.388221  | 9.140772  | 5.572176  |
| Si | 7.078310  | 9.043868  | 3.945836  |
| O  | 6.130039  | 10.312966 | 3.478212  |
| Si | 4.971402  | 11.328660 | 4.075655  |
| O  | 5.174809  | 11.540468 | 5.703909  |
| O  | 6.355709  | 7.595077  | 3.614120  |
| O  | 8.485709  | 9.072302  | 3.096521  |
| O  | 4.793719  | 5.815761  | 2.325031  |
| Si | 5.748890  | 5.432121  | 0.982886  |
| O  | 3.453986  | 10.737192 | 3.789438  |
| O  | 5.196996  | 12.748219 | 3.276550  |
| O  | 1.507585  | 9.435139  | 2.504465  |
| Si | -0.140410 | 9.058946  | 2.429706  |
| B  | 0.278061  | 2.876201  | 6.465536  |
| H  | 8.774843  | 9.952600  | 2.838165  |
| H  | 4.529495  | 13.419977 | 3.444238  |
| H  | 10.174652 | 7.487842  | 7.059549  |
| H  | 10.197203 | 9.875510  | 7.574660  |
| H  | 10.206402 | 8.235134  | 9.388005  |
| H  | 2.530924  | 13.217735 | 9.117083  |
| H  | 3.469646  | 11.377431 | 10.423082 |
| H  | 4.606102  | 13.542181 | 10.363369 |
| H  | 6.055741  | 6.662659  | 0.198179  |
| H  | 7.013942  | 4.785826  | 1.435971  |
| H  | 4.949069  | 4.481097  | 0.162546  |
| H  | -0.563596 | 9.356572  | 1.032444  |
| H  | -0.356934 | 7.617112  | 2.739039  |
| H  | -0.902468 | 9.911102  | 3.387361  |
| H  | 6.010990  | 3.587498  | 6.986842  |
| H  | 3.698249  | 2.946118  | 6.467541  |
| H  | 4.427370  | 3.147626  | 8.811184  |
| H  | 1.930099  | 7.699827  | 11.536184 |
| H  | 2.675928  | 6.107866  | 11.680450 |
| H  | 3.611861  | 7.473432  | 11.072278 |
| H  | 0.459740  | 1.784196  | 7.103323  |
| H  | -0.689280 | 3.036317  | 5.637325  |
| H  | 1.258674  | 3.630262  | 6.298765  |
| H  | -2.499881 | 5.536482  | 8.000585  |
| H  | -1.951916 | 7.159921  | 8.433266  |
| H  | -1.959155 | 6.522558  | 10.848147 |
| H  | -3.556508 | 6.525047  | 10.120975 |
| H  | -3.637849 | 4.103707  | 10.019019 |

|   |           |          |           |
|---|-----------|----------|-----------|
| H | -3.203729 | 4.589922 | 11.646299 |
| H | -1.873822 | 2.687808 | 11.062177 |
| H | -0.769417 | 4.051614 | 11.118273 |
| H | -2.051001 | 3.142312 | 8.492495  |
| H | -0.602972 | 2.354294 | 9.105254  |
| H | -0.456685 | 4.218690 | 7.312040  |

**B:**

78

|    |           |           |           |
|----|-----------|-----------|-----------|
| C  | 2.748935  | 6.041079  | 10.640764 |
| La | 1.888571  | 5.658473  | 8.322757  |
| O  | 1.098332  | 7.797463  | 7.612150  |
| Si | 2.229777  | 8.433138  | 6.687203  |
| O  | 1.848575  | 8.564621  | 5.071112  |
| Si | 2.524256  | 9.197161  | 3.700791  |
| O  | 3.670567  | 8.174848  | 3.086809  |
| Si | 4.857102  | 7.049603  | 3.258569  |
| O  | 4.550417  | 6.084743  | 4.582870  |
| Si | 4.673789  | 6.308444  | 6.208794  |
| O  | 6.150309  | 6.907845  | 6.616060  |
| Si | 6.730917  | 8.430202  | 6.969951  |
| O  | 5.524265  | 9.305739  | 7.673577  |
| Si | 4.429508  | 10.511436 | 7.368082  |
| O  | 4.415004  | 11.566358 | 8.619428  |
| Si | 3.451095  | 11.752022 | 9.996096  |
| O  | -0.662851 | 5.382630  | 8.226234  |
| C  | -0.802789 | 3.980866  | 8.559632  |
| O  | 0.485273  | 3.634335  | 8.942145  |
| O  | 3.460644  | 7.247026  | 6.802920  |
| O  | 4.324134  | 4.889891  | 7.006121  |
| Si | 5.058184  | 3.334295  | 6.887795  |
| C  | -1.826548 | 6.203094  | 8.057185  |
| C  | -2.195528 | 6.899646  | 9.358149  |
| C  | -2.723381 | 5.984633  | 10.464953 |
| C  | -1.849339 | 4.767141  | 10.793936 |
| C  | -1.813138 | 3.722745  | 9.672212  |
| O  | 2.919960  | 9.866413  | 7.169610  |
| O  | 7.975980  | 8.255637  | 8.012842  |
| Si | 9.596590  | 8.734676  | 8.044648  |
| O  | 7.262291  | 9.168901  | 5.587886  |
| Si | 6.948619  | 9.236989  | 3.961063  |
| O  | 5.911182  | 10.484611 | 3.645827  |
| Si | 4.691657  | 11.327561 | 4.375421  |
| O  | 4.896307  | 11.343158 | 6.017239  |
| O  | 6.321781  | 7.790201  | 3.466641  |
| O  | 8.341582  | 9.461099  | 3.117236  |
| O  | 4.899435  | 6.077773  | 1.947347  |
| Si | 5.987460  | 5.829368  | 0.676098  |
| O  | 3.219951  | 10.662129 | 4.017803  |
| O  | 4.802412  | 12.851418 | 3.767246  |
| O  | 1.350220  | 9.409861  | 2.579367  |
| Si | -0.270305 | 8.944468  | 2.479280  |
| B  | 1.361871  | 2.923469  | 7.911101  |
| H  | 8.568924  | 10.383214 | 2.964708  |
| H  | 4.121764  | 13.460876 | 4.067526  |
| H  | 10.353748 | 8.046661  | 6.959384  |
| H  | 9.699717  | 10.213473 | 7.877051  |
| H  | 10.122660 | 8.329262  | 9.377262  |
| H  | 2.152041  | 12.380696 | 9.618359  |
| H  | 3.210493  | 10.433310 | 10.648045 |
| H  | 4.204502  | 12.653193 | 10.912498 |
| H  | 6.324901  | 7.128006  | 0.025774  |
| H  | 7.225973  | 5.176767  | 1.189777  |



|   |           |          |           |
|---|-----------|----------|-----------|
| H | 5.294973  | 4.931654 | -0.289415 |
| H | -0.727043 | 9.322117 | 1.112671  |
| H | -0.402985 | 7.471393 | 2.676087  |
| H | -1.077155 | 9.666794 | 3.505523  |
| H | 6.360943  | 3.517556 | 6.184675  |
| H | 4.159050  | 2.443971 | 6.112105  |
| H | 5.272859  | 2.849451 | 8.274792  |
| H | 2.031999  | 6.612166 | 11.252349 |
| H | 2.944637  | 5.103294 | 11.181986 |
| H | 3.688556  | 6.616785 | 10.652072 |
| H | 2.503094  | 3.005341 | 8.377687  |
| H | 1.040839  | 1.780785 | 7.697759  |
| H | 1.328637  | 3.587548 | 6.851133  |
| H | -2.647550 | 5.588767 | 7.664864  |
| H | -1.552257 | 6.939377 | 7.298327  |
| H | -1.304318 | 7.439322 | 9.701598  |
| H | -2.947280 | 7.666696 | 9.130084  |
| H | -3.725407 | 5.624945 | 10.189107 |
| H | -2.858672 | 6.585090 | 11.372711 |
| H | -2.254305 | 4.289530 | 11.693325 |
| H | -0.829491 | 5.078978 | 11.052025 |
| H | -2.814448 | 3.625954 | 9.232328  |
| H | -1.555294 | 2.734475 | 10.066995 |
| H | -1.089196 | 3.444015 | 7.642206  |

TS<sub>B→C</sub>

|    |           |           |           |
|----|-----------|-----------|-----------|
| 78 |           |           |           |
| C  | 2.189707  | 7.483029  | 11.221339 |
| La | 1.366491  | 6.857285  | 8.933364  |
| O  | 1.002478  | 9.255338  | 7.630377  |
| Si | 2.459183  | 9.688535  | 7.008788  |
| O  | 3.426048  | 8.498582  | 7.661991  |
| Si | 5.138812  | 8.358667  | 7.742654  |
| O  | -0.806947 | 7.714897  | 8.592618  |
| Si | -0.694857 | 9.049555  | 7.727590  |
| O  | -1.318159 | 10.443452 | 8.382000  |
| Si | -0.880988 | 12.018422 | 8.624451  |
| O  | -1.354207 | 12.969585 | 7.358325  |
| Si | -1.613659 | 12.910946 | 5.725498  |
| O  | -2.779341 | 13.986937 | 5.291039  |
| O  | 0.944110  | 4.617033  | 9.180850  |
| O  | -1.238562 | 8.932069  | 6.157326  |
| Si | -1.362195 | 9.939515  | 4.852082  |
| O  | -2.303538 | 9.224080  | 3.719833  |
| Si | -3.189014 | 7.786454  | 3.669315  |
| O  | 0.122585  | 10.244759 | 4.197218  |
| Si | 1.747561  | 10.483503 | 4.167871  |
| O  | 2.368054  | 9.990984  | 2.740906  |
| Si | 3.078938  | 10.753259 | 1.409213  |
| O  | -2.053137 | 11.375208 | 5.295669  |
| O  | 2.480956  | 9.588147  | 5.365641  |
| O  | 2.087025  | 12.084656 | 4.414710  |
| Si | 1.382121  | 13.422104 | 5.081823  |
| O  | 1.988755  | 14.723694 | 4.280982  |
| O  | 2.928670  | 11.183524 | 7.510888  |
| Si | 2.131477  | 12.562856 | 8.001251  |
| O  | 1.772892  | 13.506473 | 6.691251  |
| O  | 0.763096  | 12.118469 | 8.803937  |
| O  | 3.119508  | 13.381901 | 9.012711  |
| Si | 3.942472  | 14.856908 | 8.954557  |
| O  | -1.614792 | 12.589216 | 9.971138  |
| Si | -2.209319 | 11.882904 | 11.387582 |
| O  | -0.261177 | 13.390382 | 4.906436  |

|   |           |           |           |
|---|-----------|-----------|-----------|
| H | 1.382901  | 15.468393 | 4.220915  |
| H | -3.651129 | 13.812498 | 5.657717  |
| H | 4.872868  | 14.880306 | 7.788836  |
| H | 2.969613  | 15.982669 | 8.851083  |
| H | 4.709038  | 14.953777 | 10.227517 |
| H | -3.528802 | 11.243669 | 11.114191 |
| H | -1.248636 | 10.869875 | 11.911522 |
| H | -2.373895 | 12.992664 | 12.367933 |
| H | 2.188818  | 11.835453 | 0.898694  |
| H | 4.402891  | 11.320201 | 1.795785  |
| H | 3.253251  | 9.697195  | 0.373874  |
| H | -3.834379 | 7.745585  | 2.327277  |
| H | -2.281844 | 6.613887  | 3.836691  |
| H | -4.229069 | 7.779975  | 4.738635  |
| H | 5.698235  | 9.681177  | 8.137588  |
| H | 5.654335  | 7.942484  | 6.412166  |
| H | 5.401580  | 7.332447  | 8.783585  |
| H | 2.293214  | 8.570929  | 11.361067 |
| H | 1.503769  | 7.137346  | 12.011227 |
| H | 3.172919  | 7.043786  | 11.455078 |
| O | 2.723981  | 5.264365  | 7.413323  |
| C | 2.300816  | 4.013454  | 7.604783  |
| B | 3.963646  | 4.698256  | 6.647878  |
| H | 3.716890  | 3.463821  | 6.761110  |
| H | 3.878872  | 4.954601  | 5.475636  |
| H | 4.975501  | 4.916787  | 7.263496  |
| H | 2.706884  | 3.442722  | 8.437278  |
| C | 1.245156  | 3.440117  | 6.695899  |
| C | 0.429137  | 2.254523  | 7.236088  |
| C | 0.666351  | 3.512663  | 9.991567  |
| C | -0.806512 | 2.641168  | 8.068771  |
| C | -0.613536 | 2.783444  | 9.584331  |
| H | 1.743305  | 3.152656  | 5.764042  |
| H | 0.578245  | 4.268091  | 6.430162  |
| H | 0.087997  | 1.688265  | 6.362523  |
| H | 1.079826  | 1.564645  | 7.790570  |
| H | -1.203270 | 3.583000  | 7.672324  |
| H | -1.591630 | 1.894232  | 7.900467  |
| H | -1.484732 | 3.312025  | 9.990123  |
| H | -0.603647 | 1.792770  | 10.059729 |
| H | 1.510754  | 2.797913  | 9.947458  |
| H | 0.595742  | 3.813771  | 11.048252 |

**C:**

|    |           |           |           |
|----|-----------|-----------|-----------|
| 78 |           |           |           |
| C  | 2.683871  | 7.770907  | 11.024197 |
| La | 1.616188  | 6.670826  | 9.018616  |
| O  | 1.203351  | 9.078233  | 7.609616  |
| Si | 2.666480  | 9.563294  | 7.055797  |
| O  | 3.680989  | 8.432307  | 7.733513  |
| Si | 5.294130  | 8.574922  | 8.287325  |
| O  | -0.566473 | 7.487769  | 8.598063  |
| Si | -0.479185 | 8.811586  | 7.715027  |
| O  | -1.157473 | 10.194956 | 8.340032  |
| Si | -0.787229 | 11.785534 | 8.579675  |
| O  | -1.272876 | 12.709601 | 7.296612  |
| Si | -1.499910 | 12.622977 | 5.660614  |
| O  | -2.697877 | 13.650125 | 5.195104  |
| O  | 1.259035  | 4.665914  | 9.813074  |
| O  | -1.017757 | 8.653792  | 6.142767  |
| Si | -1.126997 | 9.649830  | 4.828696  |
| O  | -2.008974 | 8.900061  | 3.669413  |
| Si | -2.933205 | 7.488158  | 3.628070  |

|    |           |           |           |
|----|-----------|-----------|-----------|
| O  | 0.366696  | 9.992551  | 4.213785  |
| Si | 1.979679  | 10.302261 | 4.198321  |
| O  | 2.634047  | 9.816272  | 2.782134  |
| Si | 3.342066  | 10.601700 | 1.462845  |
| O  | -1.873280 | 11.067823 | 5.239009  |
| O  | 2.741856  | 9.457463  | 5.412199  |
| O  | 2.247922  | 11.920596 | 4.418672  |
| Si | 1.483265  | 13.235831 | 5.064213  |
| O  | 2.056675  | 14.553706 | 4.264928  |
| O  | 3.071537  | 11.078305 | 7.561041  |
| Si | 2.215412  | 12.434512 | 8.008412  |
| O  | 1.836797  | 13.343725 | 6.679751  |
| O  | 0.845840  | 11.962169 | 8.794740  |
| O  | 3.177922  | 13.295883 | 9.009658  |
| Si | 3.487241  | 14.937244 | 9.263972  |
| O  | -1.570813 | 12.334948 | 9.908091  |
| Si | -2.248732 | 11.591800 | 11.267237 |
| O  | -0.154071 | 13.144352 | 4.855777  |
| H  | 1.419617  | 15.269009 | 4.177110  |
| H  | -3.562149 | 13.463718 | 5.573477  |
| H  | 4.378936  | 15.453962 | 8.185986  |
| H  | 2.210969  | 15.710044 | 9.280291  |
| H  | 4.167060  | 15.036717 | 10.585174 |
| H  | -3.516269 | 10.903075 | 10.887884 |
| H  | -1.292844 | 10.614775 | 11.862704 |
| H  | -2.535905 | 12.687302 | 12.235685 |
| H  | 2.407067  | 11.620425 | 0.904300  |
| H  | 4.617593  | 11.252047 | 1.879826  |
| H  | 3.612742  | 9.542584  | 0.450938  |
| H  | -3.558113 | 7.440845  | 2.276383  |
| H  | -2.060579 | 6.294062  | 3.826661  |
| H  | -3.989970 | 7.523089  | 4.680318  |
| H  | 5.364072  | 9.523260  | 9.428412  |
| H  | 6.150195  | 9.037302  | 7.158055  |
| H  | 5.681787  | 7.198757  | 8.704123  |
| H  | 2.775431  | 8.865634  | 10.950922 |
| H  | 2.084042  | 7.570030  | 11.926335 |
| H  | 3.691827  | 7.383488  | 11.247719 |
| O  | 2.640682  | 5.137501  | 6.814321  |
| C  | 2.065634  | 3.807791  | 6.974507  |
| B  | 3.491668  | 5.404327  | 5.789502  |
| H  | 2.687220  | 3.098553  | 6.419230  |
| H  | 3.790370  | 4.528805  | 5.027484  |
| H  | 3.906304  | 6.518604  | 5.709813  |
| H  | 2.131237  | 3.598045  | 8.040117  |
| C  | 0.618085  | 3.788413  | 6.496395  |
| C  | -0.284734 | 2.779104  | 7.236386  |
| C  | 0.937098  | 3.359658  | 10.164234 |
| C  | -1.033540 | 3.350999  | 8.464967  |
| C  | -0.516737 | 2.987139  | 9.861900  |
| H  | 0.608302  | 3.592156  | 5.417390  |
| H  | 0.192412  | 4.792336  | 6.619483  |
| H  | -1.028121 | 2.419505  | 6.517058  |
| H  | 0.296723  | 1.889713  | 7.517565  |
| H  | -1.078601 | 4.443378  | 8.381974  |
| H  | -2.077050 | 3.016683  | 8.417006  |
| H  | -1.166642 | 3.486999  | 10.591735 |
| H  | -0.630733 | 1.906922  | 10.034182 |
| H  | 1.599720  | 2.646371  | 9.634765  |
| H  | 1.126827  | 3.191007  | 11.236367 |

65

|    |           |           |           |
|----|-----------|-----------|-----------|
| O  | 3.040881  | 6.959213  | 11.088640 |
| Si | 2.357267  | 6.512474  | 9.633828  |
| O  | 6.883568  | 10.176909 | 9.296529  |
| Si | 0.835638  | 3.874403  | 9.194667  |
| O  | 3.444803  | 6.836165  | 8.436318  |
| H  | 0.499995  | 4.159600  | 7.769780  |
| Si | 3.780731  | 7.975500  | 7.290355  |
| O  | 4.852266  | 9.074341  | 7.920568  |
| Si | 5.307281  | 9.756705  | 9.355217  |
| O  | 4.388224  | 11.083638 | 9.692125  |
| Si | 2.990158  | 11.859538 | 9.262974  |
| O  | 2.458671  | 11.275541 | 7.810109  |
| Si | 1.503811  | 10.085366 | 7.169289  |
| O  | 2.409073  | 8.755547  | 6.796470  |
| O  | 4.452822  | 7.194223  | 6.010928  |
| O  | 0.957828  | 7.342553  | 9.371926  |
| Si | 0.016002  | 8.695070  | 9.524514  |
| O  | -1.553379 | 8.236718  | 9.497650  |
| Si | -2.869542 | 8.490909  | 10.531226 |
| O  | 2.065658  | 4.910375  | 9.722370  |
| Si | 8.150240  | 9.955858  | 8.197304  |
| Si | 3.868341  | 8.284821  | 11.596801 |
| O  | 4.361679  | 8.054762  | 13.177032 |
| Si | 5.262131  | 6.760047  | 13.880740 |
| O  | 2.893128  | 9.591768  | 11.819031 |
| Si | 1.460572  | 10.508677 | 11.584648 |
| O  | 1.837229  | 11.646219 | 10.433982 |
| La | 2.799356  | 9.990738  | 14.460755 |
| B  | 2.212019  | 8.224221  | 16.416279 |
| N  | 4.344477  | 11.522560 | 15.122985 |
| C  | 4.436079  | 12.835303 | 14.514399 |
| C  | 5.292891  | 11.368991 | 16.207541 |
| O  | 1.184081  | 11.014152 | 13.073957 |
| O  | 5.117253  | 8.652693  | 10.595491 |
| O  | 3.302560  | 13.456472 | 9.094784  |
| Si | 2.686769  | 14.874782 | 9.776268  |
| O  | 0.329077  | 9.468621  | 10.953440 |
| O  | 0.309320  | 9.707169  | 8.250866  |
| O  | 0.851945  | 10.574096 | 5.741407  |
| H  | 4.275895  | 7.601872  | 5.157875  |
| H  | 0.212806  | 11.289735 | 5.805606  |
| H  | -4.036489 | 7.838934  | 9.874280  |
| H  | -2.606819 | 7.865224  | 11.858637 |
| H  | -3.119446 | 9.952349  | 10.692759 |
| H  | -0.371258 | 4.055264  | 10.050790 |
| H  | 1.369139  | 2.491872  | 9.336030  |
| H  | 3.418240  | 15.996991 | 9.125391  |
| H  | 1.225048  | 14.985419 | 9.498076  |
| H  | 2.926393  | 14.887897 | 11.247828 |
| H  | 8.391356  | 8.499970  | 7.981841  |
| H  | 7.821535  | 10.615976 | 6.901139  |
| H  | 9.346594  | 10.592809 | 8.813437  |
| H  | 6.065738  | 7.371624  | 14.970122 |
| H  | 4.308724  | 5.744769  | 14.394750 |
| H  | 6.137738  | 6.192940  | 12.817286 |
| H  | 5.141048  | 12.117719 | 17.004025 |
| H  | 5.196604  | 10.379512 | 16.673056 |
| H  | 6.337071  | 11.471615 | 15.864464 |
| H  | 4.255397  | 13.646881 | 15.240661 |
| H  | 5.426471  | 13.019928 | 14.063798 |
| H  | 3.690986  | 12.951345 | 13.714406 |
| H  | 3.434848  | 8.218581  | 16.198739 |

|   |          |          |           |
|---|----------|----------|-----------|
| H | 1.915579 | 7.472839 | 17.303293 |
| H | 1.900971 | 9.399216 | 16.698990 |
| H | 1.632540 | 7.924150 | 15.361161 |

A :

|    |           |           |           |
|----|-----------|-----------|-----------|
| 83 |           |           |           |
| N  | 3.020682  | 5.516591  | 10.139539 |
| La | 1.842989  | 5.435180  | 8.171527  |
| O  | 3.546355  | 7.240197  | 6.922493  |
| Si | 4.990334  | 6.780870  | 6.234627  |
| O  | 6.224835  | 7.736250  | 6.765814  |
| Si | 6.561837  | 9.263013  | 7.303792  |
| O  | 5.223266  | 9.897357  | 8.034481  |
| Si | 3.883213  | 10.790736 | 7.672433  |
| O  | 3.488596  | 11.694504 | 8.983975  |
| Si | 2.144117  | 11.795978 | 9.991912  |
| O  | 1.044685  | 7.543246  | 7.424824  |
| Si | 2.232948  | 8.304593  | 6.672851  |
| O  | 2.039086  | 8.479840  | 5.030417  |
| Si | 2.503611  | 9.434547  | 3.766052  |
| O  | 2.826521  | 10.972943 | 4.277630  |
| Si | 4.112472  | 11.893947 | 4.772125  |
| O  | 3.920751  | 13.449350 | 4.271330  |
| O  | 5.206019  | 5.236923  | 6.732220  |
| Si | 5.921567  | 3.847568  | 6.067003  |
| O  | -0.003276 | 3.966418  | 9.578934  |
| C  | -0.967571 | 4.715493  | 9.587711  |
| C  | -2.286765 | 4.397210  | 10.225600 |
| C  | -2.669959 | 5.349982  | 11.374480 |
| C  | -3.209700 | 6.707006  | 10.921220 |
| C  | -2.232696 | 7.553745  | 10.103917 |
| C  | -1.777471 | 6.928879  | 8.798008  |
| O  | -0.769018 | 5.900804  | 8.985438  |
| O  | 2.619116  | 9.797720  | 7.295562  |
| O  | 4.209134  | 11.823625 | 6.423841  |
| O  | 5.516701  | 11.374435 | 4.082936  |
| Si | 6.786321  | 10.363408 | 4.410750  |
| O  | 8.183639  | 10.984761 | 3.807625  |
| O  | 7.032546  | 10.217821 | 6.035342  |
| O  | 6.466908  | 8.884895  | 3.736940  |
| Si | 5.196535  | 7.908154  | 3.343845  |
| O  | 3.842730  | 8.804424  | 3.024920  |
| O  | 7.771799  | 9.184737  | 8.400194  |
| Si | 9.366862  | 9.738768  | 8.458181  |
| O  | 4.893607  | 6.855496  | 4.586902  |
| O  | 5.618868  | 7.060839  | 2.009623  |
| Si | 4.784610  | 6.266193  | 0.774981  |
| O  | 1.286945  | 9.502238  | 2.668094  |
| Si | -0.226665 | 8.764850  | 2.556126  |
| B  | 1.925098  | 3.426142  | 6.342288  |
| H  | 8.143108  | 11.252592 | 2.884825  |
| H  | 3.078131  | 13.848806 | 4.505792  |
| H  | -0.802339 | 9.195316  | 1.250705  |
| H  | -0.094079 | 7.280027  | 2.594421  |
| H  | -1.109232 | 9.222013  | 3.670537  |
| H  | 3.485937  | 5.731872  | 1.277467  |
| H  | 4.542817  | 7.218938  | -0.347254 |
| H  | 5.658758  | 5.151014  | 0.314855  |
| H  | 2.463285  | 12.825799 | 11.020127 |
| H  | 0.939104  | 12.214275 | 9.215068  |
| H  | 1.877924  | 10.484343 | 10.652558 |
| H  | 10.154525 | 9.168254  | 7.327359  |
| H  | 9.397531  | 11.228614 | 8.400869  |

|   |           |          |           |
|---|-----------|----------|-----------|
| H | 9.920346  | 9.264718 | 9.757753  |
| H | 5.898754  | 2.815656 | 7.137677  |
| H | 5.163939  | 3.398262 | 4.868895  |
| H | 7.332242  | 4.165098 | 5.692171  |
| C | 3.498006  | 4.343398 | 10.837815 |
| H | -1.248210 | 7.644220 | 8.166795  |
| H | -2.610194 | 6.495559 | 8.231794  |
| H | -2.713144 | 8.506043 | 9.847961  |
| H | -1.344250 | 7.809531 | 10.695008 |
| H | -3.517665 | 7.275524 | 11.806094 |
| H | -4.122329 | 6.546101 | 10.329832 |
| H | -1.807013 | 5.483575 | 12.038779 |
| H | -3.437916 | 4.846016 | 11.970699 |
| H | -2.199982 | 3.370158 | 10.584833 |
| H | -3.066601 | 4.411355 | 9.452058  |
| H | 0.792558  | 3.565898 | 6.836853  |
| H | 1.945043  | 2.518477 | 5.554083  |
| H | 2.229043  | 4.502408 | 5.808761  |
| H | 2.716425  | 3.215250 | 7.275480  |
| H | 3.123417  | 4.289335 | 11.876365 |
| H | 3.167547  | 3.424698 | 10.332858 |
| H | 4.600467  | 4.303099 | 10.893336 |
| C | 3.456196  | 6.734111 | 10.785956 |
| H | 3.084119  | 6.817927 | 11.824083 |
| H | 4.556340  | 6.820127 | 10.835772 |
| H | 3.092507  | 7.618170 | 10.243661 |

TS<sub>A→AB</sub>

|    |           |           |           |
|----|-----------|-----------|-----------|
| 83 |           |           |           |
| N  | 3.067177  | 6.654004  | 10.924900 |
| La | 2.128607  | 6.286761  | 8.871164  |
| O  | 3.582272  | 7.828349  | 7.184324  |
| Si | 4.744417  | 6.850799  | 6.560336  |
| O  | 6.249371  | 7.435990  | 6.872723  |
| Si | 6.868702  | 8.965060  | 7.112696  |
| O  | 5.730528  | 9.884355  | 7.873734  |
| Si | 4.621104  | 11.080704 | 7.595907  |
| O  | 4.725900  | 12.182927 | 8.802730  |
| Si | 3.631522  | 12.851345 | 9.900795  |
| O  | 1.302262  | 8.414622  | 8.206068  |
| Si | 2.347338  | 9.017718  | 7.163545  |
| O  | 1.822843  | 9.134276  | 5.589098  |
| Si | 2.404438  | 9.669325  | 4.138542  |
| O  | 3.143082  | 11.136460 | 4.325583  |
| Si | 4.649577  | 11.784864 | 4.549873  |
| O  | 4.726415  | 13.289987 | 3.891681  |
| O  | 4.441677  | 5.452668  | 7.424099  |
| Si | 5.084845  | 3.866125  | 7.270438  |
| O  | 1.044576  | 4.118130  | 9.206958  |
| C  | -0.099657 | 4.330601  | 8.660902  |
| C  | -1.207213 | 3.284032  | 8.809606  |
| C  | -2.168975 | 3.560141  | 9.974285  |
| C  | -3.286995 | 4.551701  | 9.627770  |
| C  | -2.842242 | 5.998465  | 9.397402  |
| C  | -1.717663 | 6.175306  | 8.388788  |
| O  | -0.483379 | 5.673293  | 8.923230  |
| O  | 3.091449  | 10.452922 | 7.560179  |
| O  | 4.979451  | 11.839219 | 6.170283  |
| O  | 5.790833  | 10.896681 | 3.754429  |
| Si | 6.865157  | 9.678999  | 4.068782  |
| O  | 8.266222  | 9.922114  | 3.245405  |
| O  | 7.286111  | 9.642720  | 5.664189  |
| O  | 6.173043  | 8.239539  | 3.625106  |

|    |           |           |           |
|----|-----------|-----------|-----------|
| Si | 4.702900  | 7.493270  | 3.579781  |
| O  | 3.479786  | 8.593479  | 3.487944  |
| O  | 8.194504  | 8.814391  | 8.053609  |
| Si | 9.786463  | 9.382125  | 7.987157  |
| O  | 4.540190  | 6.563340  | 4.955108  |
| O  | 4.665913  | 6.498934  | 2.284585  |
| Si | 3.479326  | 5.994614  | 1.189924  |
| O  | 1.156467  | 9.826479  | 3.089573  |
| Si | -0.524685 | 9.815912  | 3.257335  |
| B  | 0.734422  | 4.769584  | 6.265350  |
| H  | 8.157119  | 10.180794 | 2.325511  |
| H  | 4.073321  | 13.913337 | 4.222703  |
| H  | -1.073677 | 10.220838 | 1.932506  |
| H  | -1.000124 | 8.448513  | 3.613087  |
| H  | -0.948782 | 10.791489 | 4.303952  |
| H  | 2.193226  | 5.737277  | 1.898417  |
| H  | 3.289131  | 7.042088  | 0.145430  |
| H  | 3.990426  | 4.740858  | 0.569152  |
| H  | 4.403162  | 13.840843 | 10.703915 |
| H  | 2.525593  | 13.540006 | 9.172129  |
| H  | 3.070769  | 11.793506 | 10.788896 |
| H  | 10.514103 | 8.720837  | 6.866340  |
| H  | 9.800078  | 10.862131 | 7.804718  |
| H  | 10.408065 | 9.017343  | 9.290619  |
| H  | 4.414063  | 3.076300  | 8.335979  |
| H  | 4.775222  | 3.336583  | 5.916535  |
| H  | 6.555984  | 3.931848  | 7.492509  |
| C  | 3.456225  | 5.554414  | 11.783269 |
| H  | -1.533496 | 7.232928  | 8.184743  |
| H  | -1.926642 | 5.679601  | 7.431976  |
| H  | -3.701043 | 6.591645  | 9.057334  |
| H  | -2.511528 | 6.445454  | 10.343390 |
| H  | -4.033343 | 4.543362  | 10.431338 |
| H  | -3.805379 | 4.186822  | 8.729402  |
| H  | -1.606948 | 3.898425  | 10.853298 |
| H  | -2.632122 | 2.606915  | 10.255026 |
| H  | -0.678002 | 2.337779  | 8.950910  |
| H  | -1.777842 | 3.196337  | 7.878394  |
| H  | 0.015623  | 4.335298  | 7.346990  |
| H  | 0.121228  | 4.296724  | 5.345318  |
| H  | 0.658296  | 5.973961  | 6.388526  |
| H  | 1.799632  | 4.262220  | 6.541047  |
| H  | 2.916591  | 5.561624  | 12.747184 |
| H  | 3.237274  | 4.586125  | 11.309457 |
| H  | 4.535190  | 5.564586  | 12.021136 |
| C  | 3.321877  | 7.932203  | 11.554463 |
| H  | 2.783054  | 8.040736  | 12.513005 |
| H  | 4.393500  | 8.088633  | 11.771655 |
| H  | 2.996695  | 8.755858  | 10.906636 |

**AB :**

|    |          |           |           |
|----|----------|-----------|-----------|
| 83 |          |           |           |
| N  | 2.740916 | 6.800779  | 10.971965 |
| La | 1.993285 | 6.503399  | 8.829954  |
| O  | 3.538537 | 7.937635  | 7.166017  |
| Si | 4.666506 | 6.899916  | 6.570866  |
| O  | 6.184713 | 7.427135  | 6.920313  |
| Si | 6.852961 | 8.935032  | 7.165702  |
| O  | 5.718730 | 9.912262  | 7.857897  |
| Si | 4.671307 | 11.148678 | 7.519145  |
| O  | 4.774184 | 12.263062 | 8.715154  |
| Si | 3.664588 | 12.982880 | 9.764410  |
| O  | 1.229213 | 8.627511  | 8.045012  |

|    |           |           |           |
|----|-----------|-----------|-----------|
| Si | 2.341528  | 9.164347  | 7.039172  |
| O  | 1.908326  | 9.240174  | 5.435270  |
| Si | 2.544092  | 9.750337  | 3.998943  |
| O  | 3.329566  | 11.190876 | 4.199614  |
| Si | 4.848322  | 11.791725 | 4.468444  |
| O  | 5.002840  | 13.277539 | 3.780801  |
| O  | 4.270054  | 5.527282  | 7.434725  |
| Si | 4.769971  | 3.893659  | 7.217758  |
| O  | 1.227859  | 4.236257  | 8.637514  |
| C  | -0.036664 | 4.339333  | 8.330049  |
| C  | -0.957220 | 3.171527  | 8.704379  |
| C  | -1.560216 | 3.266851  | 10.112650 |
| C  | -2.830436 | 4.124330  | 10.179607 |
| C  | -2.629851 | 5.624652  | 9.952035  |
| C  | -1.868471 | 5.987765  | 8.686100  |
| O  | -0.486926 | 5.623811  | 8.806832  |
| O  | 3.118887  | 10.584560 | 7.429872  |
| O  | 5.116912  | 11.870649 | 6.099239  |
| O  | 5.990326  | 10.847886 | 3.740501  |
| Si | 7.000167  | 9.593692  | 4.118611  |
| O  | 8.436972  | 9.762522  | 3.339558  |
| O  | 7.364919  | 9.571078  | 5.728272  |
| O  | 6.263818  | 8.174123  | 3.682328  |
| Si | 4.768097  | 7.487998  | 3.574247  |
| O  | 3.599916  | 8.634249  | 3.381976  |
| O  | 8.126596  | 8.747776  | 8.170089  |
| Si | 9.735366  | 9.270434  | 8.180789  |
| O  | 4.489522  | 6.606577  | 4.963118  |
| O  | 4.754879  | 6.455134  | 2.309005  |
| Si | 3.648505  | 6.060447  | 1.092195  |
| O  | 1.331992  | 9.945585  | 2.915750  |
| Si | -0.354187 | 9.965779  | 3.039437  |
| B  | 0.127068  | 4.970436  | 5.838953  |
| H  | 8.370218  | 10.030789 | 2.418375  |
| H  | 4.340379  | 13.920951 | 4.048883  |
| H  | -0.858527 | 10.365282 | 1.695261  |
| H  | -0.861716 | 8.611493  | 3.398448  |
| H  | -0.785998 | 10.962901 | 4.062104  |
| H  | 2.288340  | 5.864734  | 1.670279  |
| H  | 3.619514  | 7.145561  | 0.069380  |
| H  | 4.139459  | 4.794062  | 0.481091  |
| H  | 4.441853  | 13.950161 | 10.588890 |
| H  | 2.613838  | 13.704976 | 8.988321  |
| H  | 3.031142  | 11.955204 | 10.639266 |
| H  | 10.503509 | 8.568466  | 7.113022  |
| H  | 9.800865  | 10.745857 | 7.974108  |
| H  | 10.275077 | 8.913082  | 9.522256  |
| H  | 4.670616  | 3.261807  | 8.559052  |
| H  | 3.872554  | 3.239536  | 6.231839  |
| H  | 6.179216  | 3.907540  | 6.734216  |
| C  | 2.990167  | 5.708721  | 11.888856 |
| H  | -1.876959 | 7.068951  | 8.522455  |
| H  | -2.290535 | 5.514601  | 7.790921  |
| H  | -3.608734 | 6.120417  | 9.916337  |
| H  | -2.090540 | 6.064648  | 10.800751 |
| H  | -3.306516 | 3.984096  | 11.157762 |
| H  | -3.545455 | 3.740455  | 9.437698  |
| H  | -0.805770 | 3.633936  | 10.819253 |
| H  | -1.816065 | 2.251938  | 10.438725 |
| H  | -0.330042 | 2.281056  | 8.604541  |
| H  | -1.764355 | 3.075460  | 7.968101  |
| H  | -0.199722 | 4.415609  | 7.125822  |
| H  | -0.965838 | 5.350198  | 5.513126  |



|   |          |          |           |
|---|----------|----------|-----------|
| H | 0.917380 | 5.811567 | 6.204705  |
| H | 0.573684 | 3.964245 | 5.360361  |
| H | 2.359676 | 5.765538 | 12.794701 |
| H | 2.777882 | 4.740645 | 11.413106 |
| H | 4.039314 | 5.678301 | 12.233995 |
| C | 3.000202 | 8.083638 | 11.590665 |
| H | 2.372870 | 8.253962 | 12.484297 |
| H | 4.050974 | 8.191383 | 11.913557 |
| H | 2.790623 | 8.903247 | 10.890501 |

TS<sub>AB→B</sub>

|    |           |           |           |
|----|-----------|-----------|-----------|
| 83 |           |           |           |
| N  | 2.175973  | 6.699032  | 10.862434 |
| La | 1.706618  | 6.208987  | 8.663411  |
| O  | 1.060234  | 8.804365  | 7.649930  |
| Si | 2.165311  | 9.963283  | 7.023258  |
| O  | -0.126693 | 4.660523  | 8.474250  |
| Si | -1.406449 | 5.517830  | 8.077738  |
| O  | -2.687544 | 5.549681  | 9.143475  |
| Si | -3.652012 | 6.673545  | 9.877035  |
| O  | -5.052661 | 6.884787  | 9.019809  |
| Si | -5.613636 | 6.832843  | 7.464441  |
| O  | -7.193521 | 6.375123  | 7.432251  |
| O  | 3.452169  | 4.473895  | 7.873380  |
| C  | 4.024330  | 3.182745  | 8.073057  |
| C  | 4.922096  | 3.161130  | 9.303481  |
| C  | 6.233524  | 3.938316  | 9.162556  |
| C  | 6.095137  | 5.380750  | 8.659699  |
| C  | 5.637677  | 5.478628  | 7.200417  |
| C  | 4.120420  | 5.449024  | 6.977274  |
| O  | 3.497239  | 6.618515  | 7.233057  |
| O  | -0.779207 | 7.116119  | 8.080629  |
| Si | -0.587237 | 8.634318  | 7.481738  |
| O  | -1.418681 | 9.726864  | 8.389493  |
| Si | -2.782525 | 9.630681  | 9.341644  |
| O  | -4.132041 | 9.936968  | 8.434929  |
| Si | -4.739106 | 9.755931  | 6.904247  |
| O  | -5.734519 | 11.012156 | 6.536351  |
| O  | -2.023728 | 5.255746  | 6.552155  |
| Si | -3.324760 | 5.737384  | 5.655451  |
| O  | -3.557251 | 4.672624  | 4.433814  |
| Si | -2.731307 | 3.297578  | 3.902401  |
| O  | -3.073622 | 7.238671  | 5.007242  |
| Si | -2.442149 | 8.754935  | 5.062944  |
| O  | -2.131007 | 9.286186  | 3.550102  |
| Si | -2.760993 | 10.493744 | 2.548603  |
| O  | -4.690865 | 5.778080  | 6.586909  |
| O  | -0.997075 | 8.750193  | 5.891703  |
| O  | -3.490968 | 9.785635  | 5.820842  |
| O  | -2.867679 | 8.125536  | 10.011497 |
| O  | -2.640095 | 10.761034 | 10.513055 |
| Si | -3.669430 | 11.914145 | 11.196223 |
| O  | -4.045302 | 6.156589  | 11.381100 |
| Si | -3.781576 | 4.731347  | 12.247102 |
| O  | -5.593754 | 8.344717  | 6.796822  |
| B  | 2.630446  | 5.949215  | 4.124277  |
| H  | -6.669726 | 10.814451 | 6.643946  |
| H  | -7.355482 | 5.457329  | 7.669363  |
| H  | -3.930605 | 13.005976 | 10.214706 |
| H  | -4.956717 | 11.281285 | 11.606754 |
| H  | -2.957975 | 12.452656 | 12.388552 |
| H  | -4.336503 | 3.563044  | 11.502330 |
| H  | -2.324141 | 4.531722  | 12.489670 |

|   |           |           |           |
|---|-----------|-----------|-----------|
| H | -4.499172 | 4.895388  | 13.542502 |
| H | -4.231274 | 10.309498 | 2.379414  |
| H | -2.478129 | 11.837293 | 3.130614  |
| H | -2.069162 | 10.344732 | 1.238113  |
| H | -3.480997 | 2.801511  | 2.714073  |
| H | -1.333944 | 3.647539  | 3.516067  |
| H | -2.719501 | 2.257045  | 4.970895  |
| H | 1.489680  | 11.292617 | 7.041806  |
| H | 2.542562  | 9.584497  | 5.638263  |
| H | 3.331792  | 9.950067  | 7.942396  |
| C | 1.317051  | 6.277576  | 11.948786 |
| C | 3.317729  | 7.437782  | 11.353199 |
| H | 2.774745  | 7.127333  | 4.005034  |
| H | 3.388327  | 5.196646  | 3.585662  |
| H | 1.695059  | 5.514391  | 4.729545  |
| H | 4.564349  | 2.878527  | 7.166329  |
| H | 3.185561  | 2.490179  | 8.200415  |
| H | 4.338578  | 3.562613  | 10.142662 |
| H | 5.143288  | 2.114710  | 9.552514  |
| H | 6.900576  | 3.395920  | 8.476803  |
| H | 6.739272  | 3.941171  | 10.136010 |
| H | 7.072628  | 5.868487  | 8.752839  |
| H | 5.412431  | 5.947804  | 9.304956  |
| H | 6.117909  | 4.683225  | 6.614480  |
| H | 5.963310  | 6.424813  | 6.755369  |
| H | 3.920941  | 5.069989  | 5.948656  |
| H | 3.024650  | 8.347594  | 11.908480 |
| H | 3.949303  | 6.841452  | 12.037449 |
| H | 3.960192  | 7.762084  | 10.522951 |
| H | 0.915714  | 7.129577  | 12.526794 |
| H | 0.453198  | 5.711942  | 11.570884 |
| H | 1.836988  | 5.621281  | 12.670819 |

**B:**

83

|    |           |           |           |
|----|-----------|-----------|-----------|
| N  | 2.448317  | 7.196969  | 10.225980 |
| La | 2.047167  | 6.665438  | 8.036640  |
| O  | 0.944790  | 9.267905  | 7.159102  |
| Si | 1.759168  | 10.621744 | 6.482610  |
| O  | 0.352705  | 4.989045  | 8.046268  |
| Si | -1.053159 | 5.704966  | 7.815000  |
| O  | -2.194095 | 5.570114  | 9.020198  |
| Si | -3.196854 | 6.566136  | 9.879136  |
| O  | -4.700320 | 6.610119  | 9.188203  |
| Si | -5.425033 | 6.501241  | 7.704723  |
| O  | -6.933261 | 5.859130  | 7.842364  |
| O  | 3.374444  | 4.507731  | 7.530343  |
| C  | 3.250072  | 3.100851  | 7.767532  |
| C  | 3.592539  | 2.757632  | 9.210788  |
| C  | 5.067696  | 2.904114  | 9.586378  |
| C  | 5.700857  | 4.260205  | 9.249777  |
| C  | 5.849446  | 4.502270  | 7.743362  |
| C  | 4.617373  | 5.059967  | 7.039093  |
| O  | 4.463008  | 6.419645  | 7.274748  |
| O  | -0.595711 | 7.350974  | 7.771715  |
| Si | -0.670947 | 8.883349  | 7.182193  |
| O  | -1.534070 | 9.858998  | 8.188691  |
| Si | -2.752103 | 9.603407  | 9.295923  |
| O  | -4.225369 | 9.755414  | 8.557570  |
| Si | -4.965810 | 9.509608  | 7.094821  |
| O  | -6.127764 | 10.645466 | 6.842649  |
| O  | -1.801995 | 5.374219  | 6.364326  |
| Si | -3.248433 | 5.690995  | 5.629526  |

|                   |           |           |           |
|-------------------|-----------|-----------|-----------|
| O                 | -3.488385 | 4.599055  | 4.433305  |
| Si                | -2.519037 | 3.413049  | 3.720130  |
| O                 | -3.257284 | 7.210384  | 4.976756  |
| Si                | -2.794092 | 8.788757  | 4.990296  |
| O                 | -2.718439 | 9.363117  | 3.463292  |
| Si                | -3.671378 | 10.401863 | 2.529077  |
| O                 | -4.492400 | 5.563560  | 6.711142  |
| O                 | -1.272929 | 8.937891  | 5.649279  |
| O                 | -3.859660 | 9.688279  | 5.881247  |
| O                 | -2.578292 | 8.098913  | 9.947811  |
| O                 | -2.611584 | 10.731057 | 10.470332 |
| Si                | -3.580470 | 11.991596 | 11.042413 |
| O                 | -3.348967 | 5.999522  | 11.408523 |
| Si                | -2.905316 | 4.574683  | 12.196720 |
| O                 | -5.656609 | 8.007918  | 7.067029  |
| B                 | 4.006772  | 7.293090  | 6.105175  |
| H                 | -6.997639 | 10.402355 | 7.173451  |
| H                 | -6.958117 | 4.918519  | 8.040780  |
| H                 | -3.826123 | 12.984397 | 9.956663  |
| H                 | -4.879442 | 11.455685 | 11.543265 |
| H                 | -2.821843 | 12.624465 | 12.156682 |
| H                 | -3.491284 | 3.392918  | 11.497568 |
| H                 | -1.420665 | 4.447047  | 12.245037 |
| H                 | -3.457347 | 4.673316  | 13.576875 |
| H                 | -5.101418 | 9.982804  | 2.587789  |
| H                 | -3.528294 | 11.801119 | 3.023975  |
| H                 | -3.157838 | 10.293206 | 1.135399  |
| H                 | -3.316026 | 2.850136  | 2.594312  |
| H                 | -1.254557 | 4.013450  | 3.204630  |
| H                 | -2.206423 | 2.341868  | 4.710309  |
| H                 | 0.789415  | 11.754586 | 6.440872  |
| H                 | 2.223687  | 10.277301 | 5.114659  |
| H                 | 2.892164  | 10.934952 | 7.391116  |
| C                 | 1.723062  | 6.709591  | 11.379065 |
| C                 | 3.511298  | 8.101703  | 10.608526 |
| H                 | 3.588868  | 8.323869  | 6.655255  |
| H                 | 4.879746  | 7.553068  | 5.314615  |
| H                 | 3.045718  | 6.732683  | 5.546392  |
| H                 | 3.876152  | 2.553255  | 7.050846  |
| H                 | 2.203651  | 2.866147  | 7.557230  |
| H                 | 2.976277  | 3.398729  | 9.854166  |
| H                 | 3.266826  | 1.726520  | 9.401358  |
| H                 | 5.648974  | 2.116043  | 9.085650  |
| H                 | 5.169833  | 2.716310  | 10.662186 |
| H                 | 6.697852  | 4.294783  | 9.703760  |
| H                 | 5.128625  | 5.076997  | 9.707037  |
| H                 | 6.151586  | 3.568395  | 7.251452  |
| H                 | 6.645726  | 5.226120  | 7.540261  |
| H                 | 4.667690  | 4.862595  | 5.957132  |
| H                 | 3.134395  | 9.000081  | 11.129529 |
| H                 | 4.248077  | 7.628190  | 11.282502 |
| H                 | 4.068635  | 8.450111  | 9.726850  |
| H                 | 1.238932  | 7.523219  | 11.948055 |
| H                 | 0.932016  | 6.011364  | 11.075710 |
| H                 | 2.376362  | 6.170766  | 12.089764 |
| TS <sub>B→c</sub> |           |           |           |
| 83                |           |           |           |
| N                 | 2.072862  | 12.500651 | 7.847084  |
| La                | 0.063015  | 12.532489 | 6.737796  |
| Si                | -2.494139 | 11.606508 | 8.519943  |
| O                 | -2.596512 | 11.048485 | 10.083911 |
| Si                | -2.633999 | 11.665368 | 11.617478 |

|    |           |           |           |
|----|-----------|-----------|-----------|
| O  | -1.810962 | 13.101201 | 11.679645 |
| Si | -2.067501 | 14.730422 | 11.740293 |
| O  | -1.776079 | 15.378596 | 10.234661 |
| Si | -1.973229 | 14.834092 | 8.692169  |
| O  | -3.376899 | 15.401548 | 8.046063  |
| Si | -4.969503 | 15.405838 | 8.527718  |
| O  | -5.614971 | 13.900915 | 8.381278  |
| Si | -5.522289 | 12.251554 | 8.427368  |
| O  | -6.675873 | 11.629594 | 7.445873  |
| Si | -6.638165 | 10.713205 | 6.027619  |
| O  | -3.618137 | 15.053132 | 12.216298 |
| Si | -5.148381 | 15.299051 | 11.630680 |
| O  | -5.994492 | 13.877985 | 11.656521 |
| Si | -5.699631 | 12.255830 | 11.537950 |
| O  | -6.859229 | 11.544214 | 12.462322 |
| O  | -1.016340 | 15.425531 | 12.781339 |
| Si | -1.135921 | 16.107169 | 14.323150 |
| O  | -4.191521 | 11.903518 | 12.119400 |
| O  | -5.814580 | 11.737955 | 9.971831  |
| O  | -1.925926 | 10.603439 | 12.644280 |
| Si | -1.094393 | 9.146944  | 12.442862 |
| O  | -5.938246 | 16.407659 | 12.553281 |
| O  | -5.051403 | 15.914970 | 10.100663 |
| O  | -5.779138 | 16.445858 | 7.563725  |
| Si | -6.670357 | 17.861173 | 7.808892  |
| O  | -4.040948 | 11.728707 | 7.913960  |
| O  | -1.439062 | 10.900550 | 7.554426  |
| O  | -0.689724 | 15.269192 | 7.728111  |
| Si | 0.081991  | 16.781740 | 7.486613  |
| O  | -0.557633 | 13.973087 | 4.685346  |
| C  | -0.240653 | 13.321379 | 3.559172  |
| C  | -1.289163 | 12.503776 | 2.848629  |
| C  | -0.777891 | 11.395323 | 1.913085  |
| C  | -0.493577 | 10.045189 | 2.596156  |
| C  | 0.928533  | 9.811356  | 3.123252  |
| C  | 1.528614  | 11.010611 | 3.858681  |
| O  | 0.594313  | 11.669238 | 4.660138  |
| O  | -1.878773 | 13.197245 | 8.612842  |
| B  | -0.722895 | 15.268070 | 3.841642  |
| C  | 3.192017  | 13.307391 | 7.418257  |
| H  | -2.010800 | 8.104159  | 11.896340 |
| H  | 0.068302  | 9.331688  | 11.527760 |
| H  | -0.425526 | 14.785934 | 2.706683  |
| H  | -1.879911 | 15.589025 | 3.775144  |
| H  | 0.133229  | 16.071247 | 4.113962  |
| H  | 0.787188  | 13.356016 | 3.204329  |
| H  | -6.525007 | 16.022753 | 13.211175 |
| H  | -6.901590 | 10.585793 | 12.395698 |
| H  | -1.855594 | 17.411072 | 14.247019 |
| H  | -1.857231 | 15.181163 | 15.243913 |
| H  | 0.261096  | 16.317380 | 14.794507 |
| H  | -0.621940 | 8.750129  | 13.798966 |
| H  | -7.827769 | 17.590275 | 8.709473  |
| H  | -5.800114 | 18.917816 | 8.401043  |
| H  | -7.151673 | 18.283935 | 6.464521  |
| H  | -8.054044 | 10.577569 | 5.584544  |
| H  | -5.838339 | 11.411061 | 4.979067  |
| H  | -6.055239 | 9.367071  | 6.297973  |
| H  | 0.405685  | 17.367419 | 8.817588  |
| H  | -0.822069 | 17.681099 | 6.721881  |
| H  | 1.321885  | 16.477208 | 6.726375  |
| C  | 2.412025  | 11.678328 | 8.987355  |
| H  | -1.924101 | 13.198125 | 2.288570  |

|   |           |           |          |
|---|-----------|-----------|----------|
| H | -1.930753 | 12.074671 | 3.626079 |
| H | -1.557630 | 11.239130 | 1.159429 |
| H | 0.099010  | 11.746235 | 1.351755 |
| H | -1.200650 | 9.928489  | 3.425300 |
| H | -0.725162 | 9.238427  | 1.890155 |
| H | 0.903008  | 8.942725  | 3.792714 |
| H | 1.601147  | 9.544762  | 2.296043 |
| H | 1.941049  | 11.713717 | 3.107856 |
| H | 2.394201  | 10.680793 | 4.454760 |
| H | 2.704796  | 12.276061 | 9.869292 |
| H | 1.556592  | 11.058899 | 9.289674 |
| H | 3.250196  | 10.989270 | 8.776935 |
| H | 3.540399  | 14.006320 | 8.200567 |
| H | 4.067129  | 12.701769 | 7.119845 |
| H | 2.923337  | 13.922488 | 6.544290 |

C :  
83

|    |           |           |           |
|----|-----------|-----------|-----------|
| N  | 1.790017  | 11.949422 | 7.464340  |
| La | -0.163423 | 11.504472 | 6.309002  |
| Si | -2.686334 | 11.507958 | 8.512794  |
| O  | -2.574296 | 11.212649 | 10.146322 |
| Si | -2.408408 | 11.859769 | 11.650023 |
| O  | -1.667333 | 13.339043 | 11.561522 |
| Si | -2.075927 | 14.925820 | 11.368084 |
| O  | -2.098996 | 15.298205 | 9.752113  |
| Si | -2.394128 | 14.624845 | 8.272893  |
| O  | -3.974144 | 14.825338 | 7.851957  |
| Si | -5.459938 | 15.004357 | 8.562023  |
| O  | -6.186733 | 13.533306 | 8.729344  |
| Si | -5.768021 | 11.935303 | 8.868701  |
| O  | -6.914008 | 11.024959 | 8.132376  |
| Si | -6.896720 | 9.975587  | 6.808361  |
| O  | -3.553043 | 15.229132 | 12.047250 |
| Si | -5.157712 | 15.294253 | 11.634693 |
| O  | -5.868387 | 13.831455 | 11.933019 |
| Si | -5.474867 | 12.225870 | 11.949692 |
| O  | -6.463186 | 11.556591 | 13.082193 |
| O  | -0.941639 | 15.878166 | 12.063399 |
| Si | -0.734215 | 16.572746 | 13.589069 |
| O  | -3.887104 | 12.030313 | 12.373886 |
| O  | -5.731142 | 11.527232 | 10.472344 |
| O  | -1.485795 | 10.879299 | 12.583145 |
| Si | -0.721148 | 9.395234  | 12.322736 |
| O  | -5.927545 | 16.454742 | 12.510168 |
| O  | -5.289094 | 15.722312 | 10.044711 |
| O  | -6.357927 | 15.964951 | 7.589083  |
| Si | -7.573468 | 17.111390 | 7.838939  |
| O  | -4.305034 | 11.674285 | 8.153491  |
| O  | -1.879312 | 10.500479 | 7.582632  |
| O  | -1.439856 | 15.426673 | 7.175073  |
| Si | -0.758311 | 16.979595 | 7.350390  |
| O  | -0.336672 | 13.746063 | 4.828478  |
| C  | 0.807817  | 14.418710 | 4.238092  |
| C  | 0.979508  | 14.113271 | 2.757748  |
| C  | 1.249060  | 12.641702 | 2.409489  |
| C  | -0.017650 | 11.793817 | 2.250467  |
| C  | 0.219307  | 10.283040 | 2.203343  |
| C  | 0.948404  | 9.739264  | 3.441845  |
| O  | 0.432751  | 10.248480 | 4.628339  |
| O  | -1.961127 | 13.034176 | 8.198491  |
| B  | -1.566636 | 14.342413 | 4.850395  |
| C  | 3.124014  | 11.611559 | 7.018422  |

|   |           |           |           |
|---|-----------|-----------|-----------|
| H | -1.731556 | 8.344670  | 12.003434 |
| H | 0.268285  | 9.505347  | 11.213463 |
| H | 0.683208  | 15.493920 | 4.399606  |
| H | -2.459600 | 13.664315 | 5.269590  |
| H | -1.731778 | 15.413418 | 4.348507  |
| H | 1.676285  | 14.079530 | 4.811768  |
| H | -6.323042 | 16.133747 | 13.326141 |
| H | -6.459235 | 10.595226 | 13.106592 |
| H | -1.591101 | 17.787573 | 13.708823 |
| H | -1.085878 | 15.595893 | 14.660729 |
| H | 0.703720  | 16.949034 | 13.687899 |
| H | -0.027562 | 9.060980  | 13.598575 |
| H | -8.515605 | 16.652428 | 8.900257  |
| H | -6.960964 | 18.413893 | 8.229622  |
| H | -8.289944 | 17.253591 | 6.540410  |
| H | -8.305951 | 9.530490  | 6.617175  |
| H | -6.416990 | 10.685871 | 5.586937  |
| H | -6.022302 | 8.801169  | 7.090826  |
| H | 0.381564  | 16.928555 | 8.306304  |
| H | -1.792610 | 17.948173 | 7.809730  |
| H | -0.271987 | 17.355543 | 5.992546  |
| C | 1.811032  | 12.465828 | 8.815936  |
| H | 1.826509  | 14.732417 | 2.433394  |
| H | 0.104911  | 14.485839 | 2.207531  |
| H | 1.828248  | 12.594744 | 1.478746  |
| H | 1.894954  | 12.209417 | 3.184398  |
| H | -0.699186 | 12.000852 | 3.081617  |
| H | -0.547706 | 12.110482 | 1.342113  |
| H | -0.755109 | 9.786546  | 2.111707  |
| H | 0.796642  | 10.009377 | 1.308828  |
| H | 2.023505  | 9.980425  | 3.360955  |
| H | 0.885169  | 8.639124  | 3.429790  |
| H | 2.412112  | 13.389778 | 8.905748  |
| H | 0.797506  | 12.713521 | 9.160084  |
| H | 2.231913  | 11.746770 | 9.542788  |
| H | 3.800113  | 12.487260 | 7.002598  |
| H | 3.609247  | 10.855906 | 7.663713  |
| H | 3.102643  | 11.197027 | 6.001880  |

#### 4.3 (BH<sub>4</sub>)La@ac-1 as catalyst form

##### (BH<sub>4</sub>)La@ac-1

|    |           |           |          |
|----|-----------|-----------|----------|
| 56 |           |           |          |
| O  | 4.655671  | -0.425772 | 5.578244 |
| Si | 4.649397  | -1.526623 | 4.345437 |
| O  | 4.148574  | -3.013568 | 4.866635 |
| O  | 9.389315  | 0.418702  | 7.316336 |
| O  | 2.766093  | -5.058230 | 5.849432 |
| Si | 2.477532  | -6.708301 | 5.642222 |
| O  | 5.430620  | -5.193302 | 5.984021 |
| Si | 7.017794  | -4.704035 | 6.088974 |
| O  | 7.514277  | -4.594390 | 7.684071 |
| Si | 7.685497  | -3.205544 | 8.573235 |
| O  | 6.222599  | -2.617841 | 9.055535 |
| Si | 4.616854  | -2.437258 | 8.717049 |
| O  | 4.067856  | -3.476492 | 7.559568 |
| Si | 4.123211  | -4.161150 | 6.056248 |
| Si | 8.204084  | -0.638358 | 6.902063 |
| H  | 10.843833 | 2.470983  | 7.689464 |
| Si | 9.407833  | 2.070952  | 7.674836 |
| O  | 6.738983  | -0.031162 | 7.350390 |
| Si | 5.111805  | 0.059228  | 7.088026 |
| O  | 4.342208  | -0.884190 | 8.210707 |

|    |           |           |           |
|----|-----------|-----------|-----------|
| O  | 3.585961  | -1.008491 | 3.209726  |
| Si | 3.709561  | -0.677856 | 1.559226  |
| O  | 6.162149  | -1.565603 | 3.645669  |
| Si | 7.543967  | -2.103674 | 4.400593  |
| O  | 8.283668  | -0.873169 | 5.262659  |
| O  | 6.974152  | -3.102698 | 5.612360  |
| O  | 8.048548  | -5.593402 | 5.211699  |
| La | 9.669151  | -4.764290 | 3.890997  |
| N  | 10.878125 | -3.612987 | 5.978167  |
| O  | 8.545534  | -2.062072 | 7.708092  |
| O  | 8.598082  | -3.561810 | 9.889562  |
| Si | 8.260729  | -3.831727 | 11.523568 |
| O  | 3.832093  | -2.726584 | 10.134162 |
| O  | 4.710366  | 1.641882  | 7.293125  |
| O  | 8.598102  | -2.843931 | 3.419241  |
| B  | 11.457803 | -6.091668 | 2.378624  |
| H  | 4.610603  | 0.488820  | 1.329222  |
| H  | 3.852905  | 1.885368  | 6.931933  |
| H  | 2.878369  | -2.819511 | 10.052334 |
| H  | 0.998724  | -6.859097 | 5.534716  |
| H  | 3.131661  | -7.199154 | 4.394370  |
| H  | 2.982940  | -7.478741 | 6.815885  |
| H  | 4.226050  | -1.869382 | 0.824539  |
| H  | 2.330292  | -0.353037 | 1.097598  |
| H  | 7.875781  | -2.551745 | 12.184233 |
| H  | 7.168638  | -4.835959 | 11.673602 |
| H  | 9.522510  | -4.354303 | 12.121313 |
| H  | 8.671773  | 2.840514  | 6.631016  |
| H  | 8.798136  | 2.309524  | 9.014252  |
| H  | 10.177550 | -3.123262 | 6.543846  |
| H  | 11.347534 | -4.256272 | 6.613391  |
| H  | 11.570082 | -2.909187 | 5.725704  |
| H  | 12.253469 | -6.680185 | 1.704458  |
| H  | 10.586313 | -6.856741 | 2.828581  |
| H  | 11.995737 | -5.536713 | 3.362156  |
| H  | 10.884162 | -5.197622 | 1.730946  |

**A :**

|    |           |           |          |
|----|-----------|-----------|----------|
| 74 |           |           |          |
| C  | 4.672751  | -0.532267 | 5.594531 |
| O  | 4.881902  | -1.466872 | 4.498168 |
| La | 4.452442  | -4.202265 | 4.155357 |
| O  | 3.150360  | -6.012350 | 3.649941 |
| Si | 1.549463  | -6.140241 | 3.715206 |
| O  | 0.860475  | -5.835273 | 2.206959 |
| Si | -0.519240 | -4.941974 | 1.969049 |
| O  | -0.348118 | -3.402915 | 2.577495 |
| Si | -0.806482 | -2.516426 | 3.910104 |
| O  | -1.090561 | -0.982865 | 3.384393 |
| Si | -2.469782 | -0.012718 | 3.349306 |
| C  | 4.191655  | 0.827198  | 5.125610 |
| C  | 5.278128  | 1.723629  | 4.531045 |
| C  | 5.970609  | 1.163438  | 3.287964 |
| C  | 6.728624  | -0.158955 | 3.512294 |
| C  | 5.851147  | -1.372350 | 3.577168 |
| O  | 5.939463  | -2.328685 | 2.815958 |
| N  | 3.097799  | -3.492909 | 1.879341 |
| O  | 2.870602  | -3.422428 | 5.599528 |
| Si | 1.287537  | -3.722351 | 5.637872 |
| O  | 0.793126  | -4.987932 | 4.665170 |
| O  | 0.410280  | -2.426575 | 5.028560 |
| O  | 0.704238  | -4.155629 | 7.141791 |
| Si | -0.487465 | -5.290952 | 7.391084 |

|    |           |            |           |
|----|-----------|------------|-----------|
| O  | -0.119892 | -6.769877  | 6.747067  |
| Si | -0.259209 | -7.762670  | 5.429712  |
| O  | -0.230061 | -9.314767  | 5.965099  |
| Si | 0.903856  | -10.558030 | 5.847194  |
| O  | -2.195706 | -3.112219  | 4.574271  |
| Si | -2.914378 | -4.186340  | 5.598909  |
| O  | -4.190927 | -3.378581  | 6.256181  |
| O  | -1.925629 | -4.724724  | 6.803790  |
| O  | -3.454611 | -5.488492  | 4.729300  |
| Si | -2.662861 | -6.556199  | 3.740931  |
| O  | -3.751508 | -7.488299  | 2.928475  |
| O  | -0.654047 | -5.484275  | 9.014526  |
| Si | 0.197365  | -4.889635  | 10.341793 |
| O  | 0.981710  | -7.578753  | 4.338760  |
| O  | -1.710773 | -7.535477  | 4.667231  |
| O  | -1.840727 | -5.705193  | 2.592724  |
| O  | -0.710635 | -4.774215  | 0.343815  |
| Si | -1.771225 | -5.462106  | -0.774496 |
| H  | -4.018907 | -8.278936  | 3.406427  |
| H  | -4.600013 | -3.829175  | 7.000908  |
| H  | -0.401954 | -5.536151  | 11.544346 |
| H  | 1.644598  | -5.239625  | 10.245771 |
| H  | 0.043866  | -3.407761  | 10.441973 |
| H  | 2.242479  | -10.101407 | 6.321475  |
| H  | 0.403613  | -11.658981 | 6.719607  |
| H  | 1.002452  | -11.039123 | 4.437908  |
| H  | -3.563312 | -0.673857  | 2.579761  |
| H  | -2.932178 | 0.292212   | 4.734092  |
| H  | -2.064476 | 1.249761   | 2.664665  |
| H  | -1.739761 | -6.950595  | -0.685077 |
| H  | -3.158848 | -4.965831  | -0.546096 |
| H  | -1.292098 | -5.024391  | -2.117586 |
| H  | 3.915023  | -1.046445  | 6.186691  |
| H  | 5.599228  | -0.473415  | 6.176221  |
| H  | 3.754605  | 1.324903   | 5.999693  |
| H  | 3.366822  | 0.681059   | 4.416952  |
| H  | 4.838131  | 2.694958   | 4.278825  |
| H  | 6.036891  | 1.923892   | 5.300519  |
| H  | 5.246331  | 1.035552   | 2.473413  |
| H  | 6.701790  | 1.896154   | 2.930777  |
| H  | 7.433778  | -0.347444  | 2.700593  |
| H  | 7.310991  | -0.105998  | 4.442570  |
| H  | 2.261544  | -2.940577  | 2.064461  |
| H  | 3.604856  | -3.021502  | 1.135175  |
| H  | 2.749324  | -4.376339  | 1.506813  |
| B  | 6.736751  | -4.886438  | 5.423545  |
| H  | 7.753466  | -5.199045  | 5.979500  |
| H  | 6.449744  | -3.694705  | 5.638451  |
| H  | 6.836553  | -5.031682  | 4.192597  |
| H  | 5.774843  | -5.569309  | 5.807669  |

TS<sub>A→AB</sub>

74

|    |           |           |          |
|----|-----------|-----------|----------|
| C  | 6.392373  | -1.293490 | 6.095967 |
| O  | 5.562661  | -1.618555 | 4.968164 |
| La | 3.678587  | -3.233926 | 4.003300 |
| O  | 2.883094  | -5.337306 | 3.621109 |
| Si | 1.351091  | -5.812597 | 3.771037 |
| O  | 0.574496  | -5.906099 | 2.286719 |
| Si | -0.896546 | -5.250645 | 1.900676 |
| O  | -0.971593 | -3.648852 | 2.366942 |
| Si | -1.700478 | -2.766751 | 3.583357 |
| O  | -2.281731 | -1.401290 | 2.879774 |



|    |           |            |           |
|----|-----------|------------|-----------|
| Si | -3.749483 | -0.571605  | 2.960886  |
| C  | 6.253585  | 0.175972   | 6.464573  |
| C  | 6.914207  | 1.154551   | 5.490952  |
| C  | 6.524233  | 0.984337   | 4.018443  |
| C  | 7.028146  | -0.327532  | 3.399372  |
| C  | 6.096408  | -1.517652  | 3.635565  |
| O  | 5.132800  | -1.714068  | 2.792758  |
| N  | 2.092232  | -2.534547  | 1.977775  |
| O  | 2.016727  | -2.670778  | 5.438390  |
| Si | 0.532665  | -3.308039  | 5.472266  |
| O  | 0.385560  | -4.728051  | 4.604596  |
| O  | -0.588465 | -2.311066  | 4.723782  |
| O  | 0.017632  | -3.733198  | 7.001561  |
| Si | -0.964246 | -5.031879  | 7.347800  |
| O  | -0.346449 | -6.472897  | 6.826241  |
| Si | -0.132517 | -7.583722  | 5.620145  |
| O  | 0.170007  | -9.031729  | 6.333826  |
| Si | 1.456892  | -10.117401 | 6.238083  |
| O  | -2.951893 | -3.604588  | 4.258119  |
| Si | -3.480967 | -4.645370  | 5.422946  |
| O  | -4.937407 | -4.055880  | 5.916358  |
| O  | -2.470057 | -4.753136  | 6.723267  |
| O  | -3.665719 | -6.153335  | 4.764004  |
| Si | -2.691817 | -7.068989  | 3.785806  |
| O  | -3.565246 | -8.270120  | 3.073696  |
| O  | -1.106518 | -5.124199  | 8.982021  |
| Si | -0.527429 | -4.177925  | 10.250201 |
| O  | 1.153587  | -7.232501  | 4.626102  |
| O  | -1.499646 | -7.748510  | 4.702742  |
| O  | -2.134136 | -6.123609  | 2.554994  |
| O  | -1.037519 | -5.250987  | 0.263992  |
| Si | -1.732118 | -6.310302  | -0.852066 |
| H  | -3.715779 | -9.034111  | 3.638137  |
| H  | -5.284945 | -4.472242  | 6.710564  |
| H  | -1.045883 | -4.798020  | 11.503017 |
| H  | 0.965276  | -4.178103  | 10.268533 |
| H  | -1.027957 | -2.776442  | 10.136209 |
| H  | 2.727453  | -9.466936  | 6.673412  |
| H  | 1.121620  | -11.239246 | 7.161192  |
| H  | 1.605649  | -10.635955 | 4.846740  |
| H  | -4.839048 | -1.385175  | 2.348710  |
| H  | -4.090242 | -0.243752  | 4.375608  |
| H  | -3.555134 | 0.684734   | 2.181374  |
| H  | -1.342172 | -7.719226  | -0.554964 |
| H  | -3.216969 | -6.175925  | -0.829598 |
| H  | -1.206432 | -5.907747  | -2.188220 |
| H  | 6.038572  | -1.927215  | 6.914465  |
| H  | 7.428644  | -1.580636  | 5.880439  |
| H  | 6.682799  | 0.315816   | 7.465047  |
| H  | 5.181973  | 0.394480   | 6.553768  |
| H  | 6.673405  | 2.175471   | 5.810438  |
| H  | 8.006497  | 1.061561   | 5.573141  |
| H  | 5.437615  | 1.064198   | 3.891962  |
| H  | 6.959862  | 1.813489   | 3.449379  |
| H  | 7.100520  | -0.248122  | 2.311240  |
| H  | 8.035425  | -0.548011  | 3.770634  |
| H  | 1.122098  | -2.835711  | 2.097470  |
| H  | 2.070821  | -1.527662  | 1.830220  |
| H  | 2.408214  | -2.944352  | 1.100823  |
| B  | 7.146123  | -3.841071  | 3.717104  |
| H  | 8.046286  | -3.861200  | 4.511681  |
| H  | 6.926938  | -2.470267  | 3.602512  |
| H  | 7.342097  | -4.086931  | 2.560112  |

H 6.072375 -4.212686 4.170664

**AB :**

74

|    |           |            |           |
|----|-----------|------------|-----------|
| C  | 6.405758  | -1.328828  | 6.086900  |
| O  | 5.584747  | -1.666200  | 4.956490  |
| La | 3.682052  | -3.238130  | 3.987629  |
| O  | 2.884874  | -5.343757  | 3.615759  |
| Si | 1.352029  | -5.814450  | 3.770989  |
| O  | 0.571430  | -5.911342  | 2.288928  |
| Si | -0.898377 | -5.253133  | 1.903181  |
| O  | -0.968856 | -3.649720  | 2.364875  |
| Si | -1.694466 | -2.762618  | 3.579681  |
| O  | -2.273544 | -1.397955  | 2.872710  |
| Si | -3.739100 | -0.564364  | 2.953730  |
| C  | 6.230743  | 0.133765   | 6.467614  |
| C  | 6.871351  | 1.136354   | 5.505174  |
| C  | 6.489641  | 0.970941   | 4.029990  |
| C  | 7.021438  | -0.325655  | 3.402178  |
| C  | 6.109956  | -1.534441  | 3.620450  |
| O  | 5.139698  | -1.723270  | 2.781088  |
| N  | 2.089687  | -2.534427  | 1.968589  |
| O  | 2.026222  | -2.666592  | 5.427489  |
| Si | 0.541601  | -3.302104  | 5.466296  |
| O  | 0.391274  | -4.724211  | 4.602684  |
| O  | -0.580100 | -2.305996  | 4.717357  |
| O  | 0.028966  | -3.722305  | 6.997787  |
| Si | -0.956287 | -5.016927  | 7.349470  |
| O  | -0.344317 | -6.461212  | 6.830286  |
| Si | -0.133084 | -7.576440  | 5.627859  |
| O  | 0.167471  | -9.022388  | 6.346494  |
| Si | 1.448561  | -10.114611 | 6.247894  |
| O  | -2.946841 | -3.595918  | 4.258212  |
| Si | -3.475409 | -4.631253  | 5.428164  |
| O  | -4.930216 | -4.037761  | 5.921580  |
| O  | -2.462490 | -4.734827  | 6.727264  |
| O  | -3.663170 | -6.141589  | 4.775568  |
| Si | -2.694163 | -7.061673  | 3.796636  |
| O  | -3.572424 | -8.262167  | 3.089421  |
| O  | -1.095464 | -5.104532  | 8.984216  |
| Si | -0.512492 | -4.155345  | 10.248448 |
| O  | 1.152798  | -7.230777  | 4.631639  |
| O  | -1.501079 | -7.741972  | 4.711808  |
| O  | -2.137394 | -6.120592  | 2.562121  |
| O  | -1.041960 | -5.257623  | 0.266752  |
| Si | -1.739656 | -6.318594  | -0.845790 |
| H  | -3.726000 | -9.023359  | 3.656817  |
| H  | -5.276867 | -4.450132  | 6.718252  |
| H  | -1.031603 | -4.769388  | 11.503968 |
| H  | 0.980223  | -4.159860  | 10.265407 |
| H  | -1.008990 | -2.752820  | 10.129791 |
| H  | 2.723878  | -9.469644  | 6.677458  |
| H  | 1.111152  | -11.233151 | 7.174229  |
| H  | 1.589732  | -10.636360 | 4.856948  |
| H  | -4.831367 | -1.376416  | 2.344366  |
| H  | -4.077481 | -0.232794  | 4.368151  |
| H  | -3.542388 | 0.689882   | 2.171443  |
| H  | -1.351148 | -7.727359  | -0.546035 |
| H  | -3.224284 | -6.182160  | -0.821322 |
| H  | -1.215477 | -5.919840  | -2.183671 |
| H  | 6.067902  | -1.977912  | 6.900109  |
| H  | 7.448695  | -1.588681  | 5.869844  |
| H  | 6.653576  | 0.274752   | 7.470662  |

|   |          |           |          |
|---|----------|-----------|----------|
| H | 5.154014 | 0.326174  | 6.555584 |
| H | 6.606597 | 2.148521  | 5.833445 |
| H | 7.965217 | 1.067258  | 5.589737 |
| H | 5.402030 | 1.029579  | 3.900379 |
| H | 6.909972 | 1.813650  | 3.469432 |
| H | 7.099313 | -0.234387 | 2.315293 |
| H | 8.030234 | -0.531910 | 3.777673 |
| H | 1.120553 | -2.838538 | 2.089426 |
| H | 2.065069 | -1.526837 | 1.826346 |
| H | 2.404330 | -2.938620 | 1.088549 |
| B | 7.189589 | -3.842232 | 3.687313 |
| H | 8.005065 | -3.844632 | 4.568728 |
| H | 6.944804 | -2.470758 | 3.560050 |
| H | 7.509893 | -4.063264 | 2.553543 |
| H | 6.082735 | -4.243965 | 4.015404 |

TS<sub>AB→B</sub>

|    |            |           |           |
|----|------------|-----------|-----------|
| 74 |            |           |           |
| Si | -2.390767  | 9.002572  | 6.825266  |
| Si | -2.186046  | 10.861986 | 9.237616  |
| O  | -1.833117  | 9.538760  | 8.324348  |
| Si | -2.857535  | 15.198683 | 12.451803 |
| O  | -2.947423  | 16.610346 | 13.286250 |
| Si | -3.713646  | 17.071131 | 14.714073 |
| O  | -1.261988  | 14.769892 | 12.364732 |
| Si | -0.077131  | 13.803060 | 11.748387 |
| O  | 1.338606   | 14.111576 | 12.531707 |
| O  | -3.497714  | 15.460741 | 10.953065 |
| Si | -3.647876  | 15.051779 | 9.358835  |
| O  | -4.138257  | 16.400262 | 8.564373  |
| Si | -5.192952  | 16.670380 | 7.276602  |
| O  | -3.682763  | 14.044354 | 13.319038 |
| Si | -3.971713  | 12.475043 | 12.834098 |
| O  | -5.369126  | 11.869368 | 13.360749 |
| La | -6.762929  | 10.673180 | 11.990345 |
| N  | -4.744502  | 8.842034  | 12.013007 |
| O  | -3.725920  | 11.339844 | 8.858681  |
| Si | -4.737187  | 12.333116 | 9.761771  |
| O  | -4.781483  | 13.862009 | 9.097814  |
| O  | -1.087964  | 12.049683 | 8.920153  |
| Si | -0.817637  | 13.682225 | 8.811091  |
| O  | 0.012714   | 14.030529 | 7.432726  |
| O  | -2.059582  | 10.363145 | 10.826246 |
| Si | -1.448348  | 10.986288 | 12.251430 |
| O  | -0.686568  | 9.742358  | 13.010268 |
| Si | 0.887216   | 9.507692  | 13.574649 |
| O  | -0.359902  | 12.190898 | 11.960830 |
| O  | 0.086577   | 14.119273 | 10.131042 |
| O  | -2.204312  | 14.553103 | 8.726363  |
| O  | -2.674304  | 11.487226 | 13.243112 |
| O  | -3.852806  | 12.536360 | 11.168589 |
| O  | -6.180148  | 11.659410 | 10.005810 |
| O  | -8.715606  | 9.575745  | 12.560326 |
| C  | -9.601283  | 10.484430 | 13.024665 |
| O  | -8.866599  | 11.775644 | 12.942303 |
| C  | -9.324617  | 12.919118 | 13.671217 |
| C  | -8.673383  | 13.002785 | 15.045499 |
| C  | -9.152713  | 11.956745 | 16.054520 |
| C  | -9.114416  | 10.502029 | 15.569470 |
| C  | -10.108333 | 10.204546 | 14.441866 |
| B  | -11.168202 | 9.702326  | 10.236337 |
| H  | 0.874534   | 13.608074 | 7.371831  |
| H  | 1.514882   | 15.046908 | 12.670767 |

|   |            |           |           |
|---|------------|-----------|-----------|
| H | -2.478308  | 10.129448 | 5.851970  |
| H | -1.407697  | 7.988438  | 6.348058  |
| H | -3.731817  | 8.364071  | 6.981226  |
| H | 1.228295   | 10.522831 | 14.612202 |
| H | 0.907527   | 8.141797  | 14.173062 |
| H | 1.861926   | 9.581086  | 12.447868 |
| H | -4.928250  | 18.057848 | 6.800230  |
| H | -4.945878  | 15.696626 | 6.173404  |
| H | -6.607167  | 16.558134 | 7.740283  |
| H | -3.427543  | 18.523393 | 14.891407 |
| H | -5.187611  | 16.855947 | 14.614853 |
| H | -3.172127  | 16.304947 | 15.874880 |
| H | -10.938156 | 8.531529  | 10.217082 |
| H | -12.206054 | 10.101055 | 10.677590 |
| H | -10.384940 | 10.477748 | 9.771805  |
| H | -10.420313 | 12.893164 | 13.732265 |
| H | -9.052297  | 13.790633 | 13.066915 |
| H | -7.588001  | 12.924037 | 14.902882 |
| H | -8.859081  | 14.006475 | 15.449963 |
| H | -10.184595 | 12.190447 | 16.353977 |
| H | -8.545784  | 12.049953 | 16.963186 |
| H | -9.345540  | 9.851585  | 16.420906 |
| H | -8.097411  | 10.227357 | 15.256196 |
| H | -11.041597 | 10.754317 | 14.621783 |
| H | -10.376605 | 9.142703  | 14.431519 |
| H | -10.475771 | 10.611865 | 12.348950 |
| H | -4.892797  | 7.909368  | 11.633739 |
| H | -3.945735  | 9.233644  | 11.506506 |
| H | -4.410457  | 8.715334  | 12.967180 |

**B:**

74

|    |           |           |           |
|----|-----------|-----------|-----------|
| Si | -2.979029 | 9.669599  | 6.395567  |
| Si | -2.501512 | 11.012246 | 9.103507  |
| O  | -2.335055 | 9.857783  | 7.942240  |
| Si | -2.532425 | 14.774275 | 13.041739 |
| O  | -2.430246 | 16.021180 | 14.106925 |
| Si | -2.879849 | 16.188038 | 15.722895 |
| O  | -0.994612 | 14.373187 | 12.583131 |
| Si | 0.062066  | 13.526141 | 11.641618 |
| O  | 1.589024  | 13.731502 | 12.224707 |
| O  | -3.432849 | 15.295877 | 11.757166 |
| Si | -3.843399 | 15.127478 | 10.165268 |
| O  | -4.440641 | 16.579977 | 9.687661  |
| Si | -5.508527 | 17.061068 | 8.476871  |
| O  | -3.215922 | 13.486237 | 13.844024 |
| Si | -3.588486 | 12.020115 | 13.138775 |
| O  | -4.912541 | 11.323055 | 13.742524 |
| La | -6.610922 | 10.358704 | 12.582685 |
| N  | -4.886868 | 8.604064  | 11.480679 |
| O  | -4.079586 | 11.522437 | 9.087747  |
| Si | -4.860414 | 12.369102 | 10.310151 |
| O  | -5.021154 | 13.979588 | 9.901454  |
| O  | -1.468530 | 12.257023 | 8.788596  |
| Si | -1.178336 | 13.884896 | 8.907784  |
| O  | -0.609154 | 14.468154 | 7.476742  |
| O  | -2.109075 | 10.259792 | 10.539266 |
| Si | -1.246260 | 10.649934 | 11.915656 |
| O  | -0.389623 | 9.304273  | 12.307265 |
| Si | 1.167355  | 9.033242  | 12.899541 |
| O  | -0.200815 | 11.897411 | 11.638003 |
| O  | -0.033462 | 14.095070 | 10.087424 |
| O  | -2.531983 | 14.750957 | 9.232940  |

|   |            |           |           |
|---|------------|-----------|-----------|
| O | -2.265115  | 10.990841 | 13.176028 |
| O | -3.697396  | 12.397008 | 11.512540 |
| O | -6.239531  | 11.657703 | 10.744842 |
| O | -8.654540  | 9.626489  | 13.854921 |
| C | -9.701548  | 10.358969 | 13.305035 |
| O | -9.011370  | 11.303462 | 12.449726 |
| C | -9.731321  | 12.415490 | 11.894372 |
| C | -9.588494  | 13.649153 | 12.773503 |
| C | -10.291055 | 13.568790 | 14.130710 |
| C | -9.977839  | 12.323316 | 14.970036 |
| C | -10.550111 | 11.029817 | 14.379430 |
| B | -8.338709  | 8.263996  | 13.224888 |
| H | 0.235598   | 14.096095 | 7.206639  |
| H | 1.781129   | 14.629423 | 12.511183 |
| H | -3.140218  | 10.988277 | 5.716562  |
| H | -2.024927  | 8.814267  | 5.633715  |
| H | -4.303036  | 8.984150  | 6.484257  |
| H | 1.430284   | 9.879938  | 14.099265 |
| H | 1.222241   | 7.590742  | 13.273188 |
| H | 2.177845   | 9.321402  | 11.841168 |
| H | -5.253360  | 18.509092 | 8.231791  |
| H | -5.283959  | 16.283552 | 7.223041  |
| H | -6.916529  | 16.872177 | 8.937206  |
| H | -2.519670  | 17.581219 | 16.113093 |
| H | -4.349753  | 15.983749 | 15.884417 |
| H | -2.140135  | 15.215912 | 16.579939 |
| H | -7.195316  | 8.004811  | 13.628458 |
| H | -9.118372  | 7.395878  | 13.519487 |
| H | -8.284350  | 8.417209  | 11.985564 |
| H | -10.780367 | 12.128612 | 11.748103 |
| H | -9.287491  | 12.589767 | 10.910772 |
| H | -8.515436  | 13.834981 | 12.913344 |
| H | -9.973025  | 14.511010 | 12.213189 |
| H | -11.378742 | 13.614571 | 13.977024 |
| H | -10.030444 | 14.464991 | 14.706022 |
| H | -10.412341 | 12.465181 | 15.965828 |
| H | -8.896193  | 12.224179 | 15.129026 |
| H | -11.549553 | 11.229308 | 13.972070 |
| H | -10.682789 | 10.269543 | 15.156169 |
| H | -10.319736 | 9.713933  | 12.662949 |
| H | -5.254426  | 8.160756  | 10.641515 |
| H | -4.017319  | 9.063951  | 11.202245 |
| H | -4.624570  | 7.848698  | 12.110437 |

TS<sub>B→C</sub>

|    |           |           |           |
|----|-----------|-----------|-----------|
| 74 |           |           |           |
| Si | 2.100270  | 12.391712 | 7.068913  |
| O  | -1.580583 | 12.445457 | 6.564565  |
| O  | 0.758039  | 11.962022 | 7.927882  |
| O  | -1.305771 | 13.221304 | 9.128071  |
| O  | 0.990654  | 14.548964 | 9.610475  |
| Si | 2.333037  | 14.988890 | 8.756380  |
| O  | 3.589143  | 15.212095 | 9.788120  |
| Si | 3.721870  | 15.502033 | 11.446766 |
| O  | 3.227303  | 11.205581 | 7.188014  |
| Si | 3.195790  | 9.584638  | 7.661698  |
| O  | 2.781764  | 13.771981 | 7.709144  |
| O  | 1.751963  | 12.621177 | 5.471758  |
| Si | 1.116252  | 13.924842 | 4.638556  |
| O  | 1.946478  | 14.336732 | 3.322373  |
| La | 2.973437  | 16.382506 | 3.659095  |
| N  | 4.629240  | 15.156702 | 5.412663  |
| Si | -1.768307 | 13.683980 | 5.482067  |

|    |           |           |           |
|----|-----------|-----------|-----------|
| O  | -0.511929 | 13.669656 | 4.399700  |
| Si | -0.886613 | 12.068262 | 8.016058  |
| O  | -1.406627 | 10.581271 | 8.493221  |
| Si | -0.656103 | 14.639001 | 9.684146  |
| O  | -1.025427 | 14.867608 | 11.271919 |
| O  | -1.869431 | 15.125934 | 6.273789  |
| Si | -1.523170 | 16.407719 | 7.249366  |
| O  | -2.801248 | 17.434549 | 7.256956  |
| Si | -2.999545 | 19.037072 | 6.760924  |
| O  | -3.163371 | 13.427367 | 4.660484  |
| Si | -3.549079 | 13.324234 | 3.019879  |
| O  | -0.190962 | 17.237503 | 6.714723  |
| Si | 1.365827  | 16.711434 | 6.446161  |
| O  | 2.239430  | 17.638266 | 5.462257  |
| O  | -1.269081 | 15.896525 | 8.803919  |
| O  | 2.088509  | 16.391983 | 7.920854  |
| O  | 1.253638  | 15.214172 | 5.700558  |
| O  | 4.862940  | 16.836022 | 2.397316  |
| C  | 6.169552  | 17.317132 | 2.280616  |
| C  | 7.071363  | 16.391022 | 1.462992  |
| C  | 6.396659  | 15.775631 | 0.230183  |
| C  | 5.548910  | 16.713433 | -0.647897 |
| C  | 4.059908  | 16.786801 | -0.275960 |
| C  | 3.679699  | 17.751622 | 0.810611  |
| O  | 2.536274  | 17.590533 | 1.465377  |
| B  | 1.849368  | 18.687019 | 0.551460  |
| H  | 2.146604  | 8.838192  | 6.908994  |
| H  | 4.543494  | 9.035733  | 7.337428  |
| H  | 2.825990  | 18.991556 | -0.179899 |
| H  | 1.040245  | 18.146475 | -0.154679 |
| H  | 1.563685  | 19.644489 | 1.220822  |
| H  | 4.317784  | 18.595125 | 1.067147  |
| H  | -1.917526 | 15.190064 | 11.430293 |
| H  | -2.353448 | 10.440743 | 8.400008  |
| H  | 2.807043  | 16.604210 | 11.862123 |
| H  | 3.407576  | 14.260323 | 12.210370 |
| H  | 5.139527  | 15.898396 | 11.683409 |
| H  | 2.944256  | 9.482294  | 9.127961  |
| H  | -4.437249 | 19.361353 | 6.983119  |
| H  | -2.141265 | 19.943379 | 7.577583  |
| H  | -2.661479 | 19.181524 | 5.315179  |
| H  | -5.032676 | 13.198501 | 2.952098  |
| H  | -3.108558 | 14.554800 | 2.300373  |
| H  | -2.908611 | 12.122527 | 2.410900  |
| H  | 3.471368  | 17.060496 | -1.158578 |
| H  | 3.688939  | 15.801481 | 0.027667  |
| H  | 5.593444  | 16.347077 | -1.679135 |
| H  | 5.982538  | 17.722295 | -0.681548 |
| H  | 5.761257  | 14.941926 | 0.551095  |
| H  | 7.182658  | 15.328657 | -0.389996 |
| H  | 7.434266  | 15.570952 | 2.095779  |
| H  | 7.960535  | 16.961865 | 1.162010  |
| H  | 6.163212  | 18.315147 | 1.802385  |
| H  | 6.620351  | 17.479556 | 3.273904  |
| H  | 5.267404  | 15.786312 | 5.893924  |
| H  | 4.078827  | 14.699080 | 6.143121  |
| H  | 5.201587  | 14.430335 | 4.988374  |

C :

74

|    |           |           |          |
|----|-----------|-----------|----------|
| Si | 2.081612  | 12.203936 | 7.469839 |
| O  | -1.572987 | 12.667337 | 6.612058 |
| O  | 0.608761  | 12.106313 | 8.211769 |

|    |           |           |           |
|----|-----------|-----------|-----------|
| O  | -1.332831 | 13.757045 | 9.062918  |
| O  | 1.043717  | 15.005964 | 9.381564  |
| Si | 2.497205  | 15.074762 | 8.599295  |
| O  | 3.679199  | 15.388622 | 9.696148  |
| Si | 3.699113  | 16.132899 | 11.210888 |
| O  | 3.019993  | 10.954824 | 7.975694  |
| Si | 2.739324  | 9.566279  | 8.892371  |
| O  | 2.872206  | 13.605711 | 7.909107  |
| O  | 1.944701  | 12.107018 | 5.827329  |
| Si | 1.468440  | 13.284259 | 4.731155  |
| O  | 2.438576  | 13.388592 | 3.453650  |
| La | 3.803105  | 15.255371 | 3.311995  |
| N  | 5.036809  | 14.250857 | 5.497394  |
| Si | -1.474584 | 13.539425 | 5.207899  |
| O  | -0.142688 | 13.057846 | 4.347375  |
| Si | -1.008881 | 12.417928 | 8.143594  |
| O  | -1.761294 | 11.095826 | 8.774747  |
| Si | -0.585502 | 15.222951 | 9.251748  |
| O  | -1.052095 | 15.920815 | 10.668429 |
| O  | -1.489789 | 15.162456 | 5.511528  |
| Si | -1.035222 | 16.500157 | 6.364650  |
| O  | -2.163708 | 17.662192 | 6.082062  |
| Si | -2.071877 | 19.279513 | 5.624620  |
| O  | -2.806486 | 13.193382 | 4.309588  |
| Si | -3.030332 | 12.324501 | 2.881976  |
| O  | 0.438843  | 17.095869 | 5.886864  |
| Si | 1.899227  | 16.278401 | 5.903725  |
| O  | 2.956086  | 16.811409 | 4.812838  |
| O  | -1.008581 | 16.200848 | 7.990559  |
| O  | 2.512893  | 16.274733 | 7.463440  |
| O  | 1.477660  | 14.682266 | 5.651678  |
| O  | 5.707404  | 15.393011 | 2.207302  |
| C  | 6.783890  | 16.116923 | 1.696225  |
| C  | 6.541298  | 16.592829 | 0.256643  |
| C  | 5.169531  | 17.235353 | 0.041018  |
| C  | 4.873977  | 18.454660 | 0.922105  |
| C  | 3.421408  | 18.951792 | 0.834782  |
| C  | 2.441668  | 18.307475 | 1.802631  |
| O  | 2.369136  | 16.860642 | 1.637851  |
| B  | 1.422657  | 16.285689 | 0.848260  |
| H  | 1.651781  | 8.746787  | 8.284113  |
| H  | 4.019118  | 8.801062  | 8.883361  |
| H  | 1.433433  | 18.708683 | 1.662455  |
| H  | 0.612436  | 16.966276 | 0.290359  |
| H  | 1.464411  | 15.093705 | 0.764459  |
| H  | 2.734782  | 18.460871 | 2.845422  |
| H  | -1.978633 | 16.176273 | 10.701005 |
| H  | -2.678349 | 10.998577 | 8.502062  |
| H  | 2.922374  | 17.406379 | 11.184233 |
| H  | 3.135987  | 15.214201 | 12.241772 |
| H  | 5.131059  | 16.417830 | 11.514726 |
| H  | 2.378791  | 9.932267  | 10.292853 |
| H  | -3.468795 | 19.800026 | 5.639262  |
| H  | -1.230847 | 20.058460 | 6.580261  |
| H  | -1.506916 | 19.403961 | 4.247397  |
| H  | -4.504607 | 12.236901 | 2.676315  |
| H  | -2.404246 | 13.038814 | 1.730570  |
| H  | -2.453497 | 10.953331 | 2.998797  |
| H  | 3.380482  | 20.025770 | 1.058384  |
| H  | 3.046055  | 18.842192 | -0.191505 |
| H  | 5.549299  | 19.269773 | 0.633729  |
| H  | 5.115232  | 18.237037 | 1.971800  |
| H  | 4.408402  | 16.466281 | 0.207188  |

|   |          |           |           |
|---|----------|-----------|-----------|
| H | 5.069845 | 17.531730 | -1.011761 |
| H | 6.627010 | 15.735520 | -0.422646 |
| H | 7.342492 | 17.293562 | -0.018048 |
| H | 6.997502 | 16.997394 | 2.330812  |
| H | 7.702291 | 15.507840 | 1.710229  |
| H | 5.714598 | 14.892092 | 5.903265  |
| H | 4.374651 | 14.028542 | 6.243196  |
| H | 5.539106 | 13.388991 | 5.295837  |
